# Supplementary material for: Candidatus Alkanophaga archaea from heated hydrothermal vent sediment oxidize petroleum alkanes
Source: Research Square preprint supplement (doi:10.21203/rs.3.rs-2096998/v1), 2022-10-04
Supplement: Supplementary file 1 [file 0204d4b98975bf22a4ce6929.xlsx]

## Sheet: Hexane-Tetradecane
MAG	Hexane	Heptane	Octane	Nonane	Decane	Dodecane	Tetradecane	Domain	Phylum	Class	Order	Family	Genus	Species
MAG_4	59.3896	42.1463	0	0	0	0	0	Archaea	Halobacteriota	Syntropharchaeia	ANME-1	B39-G2	B39-G2
MAG_1	10.1728	0.709808	32.637	44.0483	19.4388	38.6873	50.1858	Archaea	Halobacteriota	Syntropharchaeia	ANME-1	B39-G2	B39-G2	B39-G2 sp003661185
MAG_24	16.0951	9.25133	14.9231	13.6444	20.672	20.5371	17.7237	Bacteria	Desulfobacterota	Thermodesulfobacteria	Thermodesulfobacteriales	Thermodesulfobacteriaceae	Thermodesulfobacterium
MAG_6	0.848325	8.3655	6.54893	2.10769	2.52193	3.0261	0.999043	Archaea	Halobacteriota	Archaeoglobi	Archaeoglobales	Archaeoglobaceae	B5-G16
MAG_22	0.199434	4.80664	3.23108	1.43174	5.14781	2.10911	0.368013	Archaea	Thermoplasmatota	E2	UBA202	JdFR-43
MAG_20	0.0869063	1.66248	0.89506	1.21783	1.24726	1.4751	1.10312	Archaea	Halobacteriota	Archaeoglobi	Archaeoglobales	Archaeoglobaceae	Archaeoglobus
MAG_33	1.08	1.44353	3.73869	3.22806	3.57248	1.10585	2.75922	Archaea	Thermoplasmatota	E2	UBA202	JdFR-43
MAG_19	0.711397	1.37809	0.693908	2.04083	2.99048	3.52812	2.50176	Archaea	Methanobacteriota	Thermococci	Thermococcales	Thermococcaceae	Thermococcus_A	Thermococcus_A sp003663525
MAG_9	0	1.12498	0	0	0.122122	0	0.0923128	Archaea	Halobacteriota	Archaeoglobi	Archaeoglobales	Archaeoglobaceae	B5-G16
MAG_39	0	0.597498	1.29236	0	0.485436	0.0372756	0	Archaea	Iainarchaeota	Iainarchaeia	Iainarchaeales	DTGL01	DTGL01
MAG_14	0.0549938	0.543532	0.231482	0.0494495	0.441601	0.324196	1.12116	Archaea	Thermoproteota	Bathyarchaeia	B25	B25
MAG_17	0.318337	0.486567	0.226342	0	0.131504	0.341052	3.58546	Archaea	Thermoplasmatota	E2	UBA202	JdFR-43	VBQI01	VBQI01 sp008297865
MAG_30	0.0368639	0.388809	0.405577	2.85434	0.388185	4.16911	0.246194	Archaea	Thermoplasmatota	E2	DHVEG-1	B18-G2	B18-G2
MAG_66	0.0306095	0.376965	0.0460751	0	0.426895	0.299879	0.0246757	Archaea	Aenigmatarchaeota	Aenigmatarchaeia	CG10238-14	SCSR01
MAG_29	0.293554	0.370668	0.385313	0.695438	0.402892	0.293746	0.155422	Archaea	Thermoproteota	Bathyarchaeia	TCS64	TCS64	B23
MAG_48	1.26204	0.358385	1.60882	0	1.1518	0.666745	0.206257	Archaea	Methanobacteriota	Thermococci	Thermococcales	Thermococcaceae	Thermococcus_C	Thermococcus_C sp002009975
MAG_47	0.141205	0.353153	0.379935	0	0	0.165749	0.152093	Archaea	Halobacteriota	Archaeoglobi	Archaeoglobales	Archaeoglobaceae
MAG_67	0	0.317797	0	0.0632131	0.618217	0.586862	0	Archaea	Aenigmatarchaeota	Aenigmatarchaeia	CG10238-14	EX4484-224
MAG_50	0.109911	0.313979	0.394136	0.240732	0.104335	0.275348	0.26433	Archaea	Thermoproteota	Bathyarchaeia
MAG_37	0.151649	0.305124	0.738178	0.285001	0.100881	0.0385066	0.0297433	Archaea	Hadarchaeota	Hadarchaeia	Hadarchaeales	DTKF01
MAG_25	0.214825	0.292888	4.3717	2.24508	1.26404	1.48683	0.622484	Archaea	Thermoplasmatota	B47-G6	B47-G6B	47-G6
MAG_38	0.400143	0.276537	0.759679	0.189858	0.425149	0.0661896	0.211964	Archaea	Thermoplasmatota	E2	UBA202	JdFR-43	JdFR-43
MAG_15	0	0.267831	0.207886	0.0211536	0.566253	0.498473	0.951869	Archaea	Thermoproteota	Bathyarchaeia	B25	B25	EX4484-218	EX4484-218 sp002254975
MAG_95	0.0233216	0.264404	0.0605533	1.3864	0.278824	0.579082	0.300207	Archaea	Thermoproteota	Bathyarchaeia	B26-1	B26-1	B63
MAG_87	0.12362	0.246946	0.334029	0.568564	0.768806	0.888296	0.735905	Archaea	Hadarchaeota	B88-G9	B88-G9	B88-G9	B88-G9	B88-G9 sp003660555
MAG_12	0.0428656	0.246564	0.122224	0.340049	0.385465	0.192508	0.32196	Archaea	Thermoplasmatota	E2	UBA202	JdFR-43	JdFR-43
MAG_84	0.161044	0.237801	0	0.513685	0.0971033	0.160534	0.245728	Archaea	Halobacteriota	Archaeoglobi	Archaeoglobales	Archaeoglobaceae	Geoglobus
MAG_90	0.305973	0.19901	0.310651	1.74432	1.0985	0.566565	0.711615	Archaea	Methanobacteriota	Thermococci	Thermococcales	Thermococcaceae	Thermococcus_A	Thermococcus_A sp001317345
MAG_59	0.0743369	0.182323	0.137935	0.17343	0.178928	0.0622435	0.0669893	Archaea	Thermoproteota	Nitrososphaeria	Nitrososphaerales
MAG_63	0.250793	0.182141	0.728356	0.350508	0.740932	0.190456	0.102838	Archaea	Methanobacteriota	Thermococci	Thermococcales	Thermococcaceae	Thermococcus_A
MAG_94	0.0164782	0.151458	0.180404	0.96255	0.22252	0.722272	0.407451	Archaea	Thermoproteota	Bathyarchaeia	B26-1	WUQV01
MAG_44	0.0532641	0.148325	0.0999992	0.0737131	0.30347	0.0784635	0.0960371	Archaea	Methanobacteriota	Methanopyri
MAG_54	0.0237714	0.119905	0.25964	0.0391129	0.0316761	0.0462889	0.1307	Archaea	Aenigmatarchaeota	Aenigmatarchaeia	QMZP01
MAG_8	0.0389541	0.118796	0.0753155	0.0272563	0.201129	0.170777	0.112817	Archaea	Thermoproteota	EX4484-205	EX4484-205	EX4484-205	EX4484-205	EX4484-205 sp002255045
MAG_56	0	0.117986	0.185257	0.177734	0.0638316	0.06962	0.0645037	Archaea	Thermoproteota	Thermoproteia	Thermofilales	Thermofilaceae
MAG_40	0.12398	0.112243	0.251365	0.134728	0.232932	0.373489	0.132034	Archaea	Thermoproteota	Korarchaeia	Korarchaeales	Korarchaeaceae	DRBY01
MAG_11	1.92969	0.10171	12.5921	0.140252	0.49086	0.406138	0.509824	Archaea	Halobacteriota	Archaeoglobi	Archaeoglobales	Archaeoglobaceae	Archaeoglobus
MAG_96	0.0269078	0.100623	0.593859	1.21839	0.0692591	0.356292	0.334836	Archaea	Thermoproteota	Bathyarchaeia
MAG_62	0.0273678	0.0907238	0.461149	0.532918	0.939063	0.260695	0.024573	Archaea	Thermoplasmatota	E2	DHVEG-1	B18-G2	B18-G2
MAG_78	0.0480126	0.0900158	0.111775	0.130319	0.0941134	0.19787	0.125885	Archaea	Thermoproteota	Nitrososphaeria	Caldarchaeales	NZ13-MGT	EX4484-121
MAG_41	0	0.0885876	0.244752	0.0317217	0.310483	0.335902	0.205181	Archaea	Halobacteriota	Archaeoglobi	Archaeoglobales	Archaeoglobaceae	Archaeoglobus
MAG_92	0.0156107	0.0883317	0.239883	0.656546	0.501827	0.575659	0.300585	Archaea	Thermoproteota	Bathyarchaeia	B26-1	B26-1	B63
MAG_60	0.0259322	0.0807657	0.224295	0.366121	0.285328	0.0979222	0.104257	Archaea	Thermoproteota	Bathyarchaeia	B26-1	B26-1	B63	B63 sp003601725
MAG_82	0.140406	0.076592	0.285028	0	0.0967944	0.0841161	0.911306	Archaea	Asgardarchaeota	DTBI01	DTBI01
MAG_83	0	0.0719	0.0814171	0.403568	0.0991649	0.251923	0.251558	Archaea	Thermoproteota	Bathyarchaeia	B26-1	WUQV01
MAG_93	0.0225825	0.0707192	0.262777	0.427811	0.172273	0.26147	0.193495	Archaea	Thermoproteota	Bathyarchaeia	B26-1	B26-1	B63
MAG_74	0	0.0667022	0.022786	0.118193	0.0373536	0.346412	0.198567	Archaea	Thermoproteota	Korarchaeia	Korarchaeales	Korarchaeaceae	DRBY01
MAG_68	0.0257055	0.0526198	0.19822	0.211094	1.11611	0.273326	0.101584	Archaea	Thermoplasmatota	E2	DHVEG-1	B18-G2	B18-G2
MAG_70	0.0202333	0.0379307	0	0.179741	0.646119	0.0918144	0.161829	Archaea	Nanoarchaeota	Nanoarchaeia	Pacearchaeales	EX4484-31	EX4484-31	EX4484-31 sp002254805
MAG_80	0.11972	0.0358183	0.047284	0.065165	0.0458952	0.185143	0.354025	Archaea	Halobacteriota	Archaeoglobi	Archaeoglobales	Archaeoglobaceae	Archaeoglobus_A
MAG_57	0.0440757	0.0211421	0.356174	0.158076	0.124837	0.0611477	0.111762	Archaea	Thermoproteota	Korarchaeia
MAG_75	0.0684071	0.0177075	0.11378	0.136557	0.133112	0.296914	0.359935	Archaea	Asgardarchaeota	Thorarchaeia
MAG_53	0.13918	0	0.257284	0.0324056	0.197652	0.0287728	0.0167782	Archaea	Thermoproteota	Bathyarchaeia	B26-1	B26-1	B63
MAG_46	0.047288	0	0.110323	0.470959	0.390541	0.890091	0.0581652	Archaea	Thermoplasmatota	E2	DHVEG-1	B18-G2	B18-G2
MAG_72	0.0255232	0	0	0	0.708243	0	0	Archaea	Methanobacteriota	Thermococci	Thermococcales	Thermococcaceae	Thermococcus
MAG_81	0	0	0.0692919	0	0	0.490664	1.17645	Archaea	Thermoplasmatota	E2	UBA202	JdFR-43
MAG_76	0	0	0.0961463	0.245518	0.0201051	0.496746	0.407537	Archaea	Asgardarchaeota	Thorarchaeia
MAG_64	0	0	0	0	0.3878	0.314307	0.355386	Archaea	Thermoproteota	Bathyarchaeia	B26-1	B26-1	B63
MAG_28	0	0	0.265605	0.574315	0.410725	0.221832	0.106112	Archaea	Thermoproteota	Methanomethylicia	Methanomethylicales
MAG_71	0	0	0	0	0.872626	0	0.0230979	Archaea	Nanoarchaeota	Nanoarchaeia
MAG_86	0	0	0	0.571809	0	0	0	Archaea	Thermoproteota	Thermoproteia	Thermofilales	B20-G17	B67-G16	B67-G16 sp003650675
MAG_49	1.01704	4.34454	0	0.401071	0	1.75463	1.68886	Bacteria	Patescibacteria	Paceibacteria	Paceibacterales
MAG_18	0.630097	3.99033	0.569844	3.45459	2.91622	2.35216	1.03119	Bacteria	WOR-3	UBA3073	NMUJ01	NMUJ01	NMUJ01
MAG_16	0.174494	3.36116	0.221607	0.751343	1.51231	0.917261	0.534413	Bacteria	Patescibacteria	Paceibacteria	Paceibacterales	PEYH01
MAG_2	0	2.70182	0	0	12.19	0	0.356893	Bacteria	Omnitrophota	Koll11	4484-171	4484-171
MAG_27	0.259457	2.28557	4.70336	6.66698	4.33472	3.0574	1.21249	Bacteria	Bipolaricaulota	Bipolaricaulia	Bipolaricaulales	Bipolaricaulaceae	UBA3571
MAG_26	0.0639694	1.71895	0.431234	0.162932	1.34012	0.472326	0.261303	Bacteria	Patescibacteria	Paceibacteria	Paceibacterales	PEYH01
MAG_10	1.50776	0.454926	0	0.241813	0.204061	0.172479	0.367496	Bacteria	Omnitrophota	Koll11	4484-49	4484-49	4484-49
MAG_43	0.211332	0.260765	0.134028	0.0643495	0.0560289	0	0.277344	Bacteria	Latescibacterota	Latescibacteria_A	B68-G9	B68-G9	B68-G9	B68-G9 sp003645885
MAG_32	0	0.235366	0.0627843	0.229063	0.0544233	0.0491281	0.0897988	Bacteria	Desulfobacterota	BSN033	B13-G15
MAG_3	0.147395	0.222181	0.147587	0.14283	0.337075	0.366299	0.31643	Bacteria	Desulfobacterota	BSN033	B13-G15	B13-G15	B13-G15	B13-G15 sp003646705
MAG_65	0.13256	0.202291	0.059996	0.0489163	0.531512	0	0	Bacteria	Thermotogota	Thermotogae	UBA12178	UBA12178
MAG_42	0	0.201927	0	0.0504208	0.266521	0.140257	0.415347	Bacteria	Bipolaricaulota	Bipolaricaulia	Bipolaricaulales	Bipolaricaulaceae	UBA3574
MAG_45	0.134265	0.198219	0.0618578	0	0.310054	0.0553074	0.114795	Bacteria	Synergistota	GBS-1	GBS-1	GBS-1
MAG_34	0	0.142466	0.151755	0	0.261875	0.124172	0.119165	Bacteria	WOR-3	Hydrothermia	LBFQ01
MAG_61	0.158915	0.121268	0.361041	0.259073	0.710621	0.194148	0.0883803	Bacteria	Thermotogota	Thermotogae	Thermotogales	Thermotogaceae	4484-232

## Sheet: Pentane
MAG	Pentane	Domain	Phylum	Class	Order	Family	Genus	Species
MAG_4_1	64.5067	Archaea	Halobacteriota	Syntropharchaeia	ANME-1	B39-G2	B39-G2
MAG_24_1	15.5695	Bacteria	Desulfobacterota	Thermodesulfobacteria	Thermodesulfobacteriales	Thermodesulfobacteriaceae	Thermodesulfobacterium
MAG_2	2.861	Archaea	Halobacteriota	Archaeoglobi	Archaeoglobales	Archaeoglobaceae	Archaeoglobus
MAG_7	5.45879	Archaea	Thermoplasmatota	E2	Thermoplasmatota	JdFR-43
MAG_9	1.07429	Archaea	Thermoplasmatota	E2	DHVEG-1	B18-G2	B18-G2
MAG_8	1.89314	Archaea	Halobacteriota	Archaeoglobi	Archaeoglobales	Archaeoglobaceae	B5-G16
MAG_12	2.12047	Archaea	Methanobacteriota	Thermococci	Thermococcales	Thermococcaceae	Thermococcus_C	Thermococcus_C sp002009975
MAG_3	2.14777	Archaea	Halobacteriota	Archaeoglobi	Archaeoglobales	Archaeoglobaceae	Archaeoglobus
MAG_5	1.75543	Bacteria	WOR-3	UBA3073	NMUJ01	NMUJ01	NMUJ01
MAG_6	2.61288	Bacteria	Bipolaricaulota	Bipolaricaulia	Bipolaricaulales	Bipolaricaulaceae	UBA3571
