# Supplementary material for: Candidatus Alkanophaga archaea from heated hydrothermal vent sediment oxidize petroleum alkanes
Source: Research Square preprint supplement (doi:10.21203/rs.3.rs-2096998/v1), 2022-10-04
Supplement: Supplementary file 2 [file 081895f0a49aefe63aef643d.xlsx]

## Sheet: DIC_and_sulfate
DIC (mM)
	Day	0	7	14	21	28	35	42	50	Total DIC produced (mM)
	Negative control	8.57581	8.49676	8.04622	7.8478	7.41125	7.20064	7.72173	6.85492	-1.72088
	Hexane - Replicate 1	11.1931	12.3354	14.0688	15.2902	18.1394	22.3013	25.9505	29.5103	18.3172
	Hexane - Replicate 2	12.2204	13.2663	14.8229	16.7621	18.175	21.1884	24.6891	25.9995	13.7791
	Hexane - Replicate 3	12.1312	13.5753	16.0224	18.4736	19.6209	22.9123	26.2099	31.1568	19.0256
	Tetradecane - Replicate 1	11.2469	10.7324	12.8215	13.9484	15.1258	18.7821	22.0297	25.3893	14.1424
	Tetradecane - Replicate 2	12.1543	11.9781	12.4	13.3981	16.0912	20.0532	22.5975	24.8152	12.6608
	Tetradecane - Replicate 3	12.2446	11.2219	12.4635	13.5632	15.8858	18.7579	21.6575	25.7375	13.4928
DIC production (mM)
	Day	0	7	14	21	28	35	42	50
	Negative control	0	-0.0790472	-0.529582	-0.728006	-1.16456	-1.37517	-0.854077	-1.72088
	Hexane - Replicate 1	0	1.14233	2.87568	4.0971	6.94633	11.1082	14.7574	18.3172
	Hexane - Replicate 2	0	1.0459	2.60251	4.54174	5.95455	8.96796	12.4687	13.7791
	Hexane - Replicate 3	0	1.44414	3.89126	6.34244	7.48976	10.7811	14.0787	19.0256
	Tetradecane - Replicate 1	0	-0.514449	1.57464	2.70156	3.87892	7.53525	10.7828	14.1424
	Tetradecane - Replicate 2	0	-0.176217	0.245634	1.24378	3.93684	7.89886	10.4431	12.6608
	Tetradecane - Replicate 3	0	-1.02266	0.218925	1.31855	3.64118	6.5133	9.4129	13.4928
Sulfate (mM)
	Day	0	7	14	21	28	35	42	50	Total sulfate reduced (mM)
	Negative control	27.1654	25.4581	26.7283	26.0091	25.6769	27.8941	27.854	26.1987	0.966675
	Hexane - Replicate 1	24.3698	23.9176	23.2376	22.3321	19.1867	17.7126	14.102	10.4999	13.8698
	Hexane - Replicate 2	23.7592	22.4052	20.717	18.915	16.7703	15.3616	12.3224	7.72755	16.0316
	Hexane - Replicate 3	23.8529	22.0374	19.4254	17.8919	15.4553	12.6046	9.69	5.60783	18.245
	Tetradecane - Replicate 1	24.3291	23.7286	21.6486	21.081	18.3175	18.1267	14.9153	10.1315	14.1976
	Tetradecane - Replicate 2	24.3698	23.9176	23.2376	22.3321	19.1867	17.7126	14.102	10.4999	13.8698
	Tetradecane - Replicate 3	24.3494	23.7857	22.9206	20.7239	20.1518	18.2493	14.8475	10.5733	13.7762
Sulfate reduction (mM)
	Day	0	7	14	21	28	35	42	50
	Negative control	0	1.70723	0.4371	1.15627	1.48852	-0.7287	-0.688575	0.966675
	Hexane - Replicate 1	0	0.452175	1.13213	2.0376	5.18303	6.65715	10.2677	13.8698
	Hexane - Replicate 2	0	1.35397	3.04215	4.84417	6.98887	8.3976	11.4367	16.0316
	Hexane - Replicate 3	0	1.81545	4.42748	5.96093	8.39753	11.2482	14.1629	18.245
	Tetradecane - Replicate 1	0	0.600525	2.6805	3.2481	6.01163	6.20243	9.41377	14.1976
	Tetradecane - Replicate 2	0	0.452175	1.13213	2.0376	5.18303	6.65715	10.2677	13.8698
	Tetradecane - Replicate 3	0	0.563775	1.42883	3.6255	4.1976	6.10013	9.50198	13.7762
Total ratio DIC production:sulfate reduction
			Average of triplicates		Standard deviation
	Hexane - Replicate 1	1.32065	1.07431		0.189581
	Hexane - Replicate 2	0.859493
	Hexane - Replicate 3	1.04278
	Tetradecane - Replicate 1	0.996116	0.962795		0.0359786
	Tetradecane - Replicate 2	0.912833
	Tetradecane - Replicate 3	0.979435

## Sheet: Carbon_assimilation
Calculations for theoretical percentages of carbon assimilation
Option 1: 0% carbon fixation									Option 2: 100% carbon fixation
Alkane oxidation: CnH2n+2 + 2nH2O ==> nCO2 + (6n+2)H+ + (6n+2)e-									Alkane oxidation: CnH2n+2 + nH2O ==> nCH2O + 2n+2 H+ + 2n+2e-
Sulfate reduction: ((6n+2)/8)SO42- + (6n+2)*(9/8)H+ (6n+2)e- ===> ((6n+2)/8)HS- + 3n+1 H2O									Sulfate reduction: (2n+2)/8SO4 + (2n+2*)(9/8)H+ + (2n+2)e- ===> (2n+2)/8 HS- + (n+1)H2O
	Hexane	Tetradecane							Hexane	Tetradecane
n	6	14						n	6	14
C	6	14						C	6	14
H	14	30						H	14	30
SO42-	4.75	10.75						SO42-	1.75	3.75
H+	4.75	10.75						H+	15.75	33.75
CO2	6	14						CH2O	6	14
H2O	7	15						H2O	1	1
HS-	4.75	10.75						HS-	1.75	3.75
Electrtons transferred	38	86						Electrons transferred	14	30
Option 3: Mix of both processes
	Hexane								Tetradecane
n	6	6	6	6	6	6	6		14	14	14	14	14	14	14	14	14
Fraction carbon fixed	0	0.1	0.2	0.3	0.4	0.5	0.7		0	0.1	0.2	0.3	0.4	0.5	0.6	0.7	0.8
C	0	0.1	0.2	0.3	0.4	0.5	0.7		0	0.1	0.2	0.3	0.4	0.5	0.6	0.7	0.8
H	2	2.2	2.4	2.6	2.8	3	3.4		2	2.2	2.4	2.6	2.8	3	3.2	3.4	3.6
Total sulfate reduction	4.75	4.45	4.15	3.85	3.55	3.25	2.65		10.75	10.05	9.35	8.65	7.95	7.25	6.55	5.85	5.15
Sulfate reduction per carbon oxidized	0.791667	0.741667	0.691667	0.641667	0.591667	0.541667	0.441667		0.767857	0.717857	0.667857	0.617857	0.567857	0.517857	0.467857	0.417857	0.367857
DIC formed	6	5.4	4.8	4.2	3.6	3	1.8		14	12.6	11.2	9.8	8.4	7	5.6	4.2	2.8
Ratio sulfate reduction:DIC formation	0.791667	0.824074	0.864583	0.916667	0.986111	1.08333	1.47222		0.767857	0.797619	0.834821	0.882653	0.946429	1.03571	1.16964	1.39286	1.83929
Ratio DIC formation:sulfate reduction	1.26316	1.21348	1.15663	1.09091	1.01408	0.923077	0.679245		1.30233	1.25373	1.19786	1.13295	1.0566	0.965517	0.854962	0.717949	0.543689
