# Supplementary material for: Candidatus Alkanophaga archaea from heated hydrothermal vent sediment oxidize petroleum alkanes
Source: Research Square preprint supplement (doi:10.21203/rs.3.rs-2096998/v1), 2022-10-04
Supplement: Supplementary file 3 [file 3dc234bffefb7e8464836728.xlsx]

## Sheet: All
Substrate	Average doubling time [days]
n-Pentane	114.86
n-Hexane	21.14
n-Heptane	26.5
n-Octane	24.9
n-Nonane	40.21
n-Decane	16.19
n-Dodecane	12.73
n-Tetradecane	22.5

## Sheet: Pentane (C5)
Day - replicate 1	Sulfide pentane - replicate 1 [mM]	Day - replicate 2	Sulfide pentane -replicate 2 [mM]
3	0.618182	3	0.509091
13	0.909091	13	0.836364
26	1.27273	26	1.49091
40	2	40	2.14545
59	2.10909	59	3.27273
76	1.89091	76	3.38182
89	2.32727	89	4.87273
101	2.94545	101	4.76364
130	4.07273	130	5.96364
143	4.47273	143	6.50909
150	4.4	150	7.30909
157	3.09091	157	5.70909
171	4.72727	171	7.96364
185	2.72727	185	7.78182
208	3.92727	208	9.6
230	5.45455	230	10.7636
249	7.41818	249	12.1091
265	8.98182	265	11.4545
277	12.2909	277	12.6909
298	1.2	279	0.581818
319	2.90909	298	1.34545
340	4.54545	319	1.63636
368	7.45455	340	2.10909
390	12.5091	368	3.12727
427	1.74545	390	4.25455
453	1.56364	427	5.34545
467	2.21818	453	5.67273
495	2	467	6.61818
536	3.63636	495	5.67273
579	2.69091	536	7.85455
608	3.74545	579	7.49091
634	6.36364	608	7.38182
663	13.3455	634	7.56364
		663	11.2364
		729	12.2909
Dilution 0
Dilution 1
Dilution 2
	Inclination (m)	Doubling time [days]	Mean doubling time - first 2 dilutions [days]	Mean doubling time - both replicates [days]
Replicate 1 - Dilution 1	0.024	28.8811	108.109	114.86
Replicate 1 - Dilution 2	0.0037	187.337
Replicate 2 - Dilution 1	0.0054	128.361	NA

## Sheet: Hexane (C6)
Day	Sulfide hexane - replicate 1 [mM]	Sulfide hexane -replicate 2 [mM]
3	0.545455	0.509091
13	1.09091	0.763636
26	1.2	1.12727
40	1.30909	1.63636
59	1.6	1.70909
76	1.96364	2.36364
89	3.45455	3.49091
101	2.36364	3.41818
130	3.23636	5.78182
143	3.92727	9.30909
150	4.4	11.6364
157	4.29091	11.6364
171	7.12727	17.1636
175	1.30909	1.41818
185	3.27273	2.90909
208	5.96364	5.52727
230	10.7273	11.0909
232	1.2	1.56364
249	2.8	2.61818
265	4.21818	4.94545
277	5.6	6.69091
298	9.30909	12.1818
Dilution 0
Dilution 1
Dilution 2
	Inclination (m)	Doubling time [days]	Mean doubling time - first 2 dilutions [days]	Mean doubling time - both replicates [days]
Replicate 1 - Dilution 1	0.0352	19.6917	21.4369	21.1426
Replicate 1 - Dilution 2	0.0299	23.1822
Replicate 2 - Dilution 1	0.0352	19.6917	20.8482
Replicate 2 - Dilution 2	0.0315	22.0047

## Sheet: Heptane (C7)
Day	Sulfide heptane - replicate 1 [mM]	Sulfide heptane - replicate 2 [mM]
3	0.509091	0.581818
13	1.27273	1.01818
26	1.81818	1.70909
40	2.10909	1.92727
59	2.21818	2.43636
76	3.96364	5.09091
89	8.32727	11.6
101	12.8727	14.0727
103	1.92727	2.07273
130	7.16364	7.41818
143	8	8.65
150	10.1091	11.6727
157	8.87273	9.96364
171	14.3273	13.6364
175	2.21818	2.10909
185	4.10909	3.56364
208	7.27273	6.50909
230	8.76364	9.63636
Dilution 0
Dilution 1
Dilution 2
	Inclination (m)	Doubling time [days]	Mean doubling time - first 2 dilutions [days]	Mean doubling time - both replicates [days]
Replicate 1 - Dilution 1	0.0277	25.0234	27.135	26.5001
Replicate 1 - Dilution 2	0.0237	29.2467
Replicate 2 - Dilution 1	0.027	25.6721	25.8651
Replicate 2 - Dilution 2	0.0266	26.0582

## Sheet: Octane (C8)
Day	Sulfide octane - replicate 1 [mM]	Sulfide octane -replicate 2 [mM]
3	0.4	0.4
13	0.836364	1.23636
26	1.09091	1.63636
40	1.74545	2.65455
59	1.74545	2.32727
76	2.50909	2.94545
89	4.61818	4.36364
101	7.45455	6.10909
130	17.3818	18.1091
133	1.96364	1.92727
143	2.65455	2.72727
150	4.21818	3.49
157	4.98182	3.41818
171	9.30909	6.36364
185	11.8909	6.87273
208	14	10.5455
210	1.45455	1.2
230	3.78182	3.56364
249	5.74545	6.07273
265	8.43636	8.07273
277	13.0182	12.3636
Dilution 0
Dilution 1
Dilution 2
	Inclination (m)	Doubling time [days]	Mean doubling time - first 2 dilutions [days]	Mean doubling time - both replicates [days]
Replicate 1 - Dilution 1	0.0277	25.0234	23.7641	24.9012
Replicate 1 - Dilution 2	0.0308	22.5048
Replicate 2 - Dilution 1	0.0224	30.9441	26.0383
Replicate 2 - Dilution 2	0.0328	21.1325

## Sheet: Nonane (C9)
Day - replicate 1	Sulfide nonane - replicate 1 [mM]	Day - replicate 2	Sulfide nonane -replicate 2 [mM]
3	0.4	3	0.436364
13	1.05455	13	1.41818
26	1.2	26	1.38182
40	1.96364	40	5.09091
59	2.61818	59	9.01818
76	6.03636	76	11.3818
89	14.6545	89	14.5455
101	17.3091	103	1.78182
103	2.72727	130	7.2
130	10.6545	143	8.18182
143	13.0545	150	10.6182
150	14	159	1.56364
157	14.9455	171	4.87273
159	2.36364	185	4.18182
171	5.38182	208	6.50909
185	3.2	230	7.89091
208	4.50909	249	9.56364
230	5.70909	265	10.2182
249	7.89091	277	12.2182
265	8.10909
277	10.0727
Dilution 0
Dilution 1
Dilution 2
	Inclination (m)	Doubling time [days]	Mean doubling time - first 2 dilutions [days]	Mean doubling time - both replicates [days]
Replicate 1 - Dilution 1	0.0319	21.7288	45.5217	40.2056
Replicate 1 - Dilution 2	0.01	69.3147
Replicate 2 - Dilution 1	0.0376	18.4348	34.8895
Replicate 2 - Dilution 2	0.0135	51.3442

## Sheet: Decane (C10)
Day	Sulfide decane - replicate 1 [mM]	Sulfide decane - replicate 2 [mM]
3	0.436364	0.436364
13	1.01818	0.909091
26	1.09091	0.945455
40	1.81818	1.52727
59	2.14545	1.70909
76	2.58182	2.29091
89	6.43636	5.56364
101	12.0727	10.5818
103	2.21818	1.67273
130	10.8727	10.5091
133	0.945455	1.12727
143	1.89091	1.16364
150	2.69091	2.36364
157	2.72727	1.89091
171	5.01818	5.74545
185	5.30909	6.50909
208	12.6909	11.7091
Dilution 0
Dilution 1
Dilution 2
	Inclination (m)	Doubling time [days]	Mean doubling time - first 2 dilutions [days]	Mean doubling time - both replicates [days]
Replicate 1 - Dilution 1	0.0589	11.7682	17.0279	16.1854
Replicate 1 - Dilution 2	0.0311	22.2877
Replicate 2 - Dilution 1	0.0681	10.1784	15.3428
Replicate 2 - Dilution 2	0.0338	20.5073

## Sheet: Dodecane (C12)
Day	Sulfide dodecane - replicate 1 [mM]	Sulfide dodecane - replicate 2 [mM]
3	0.472727	0.4
13	1.09091	1.09091
26	1.05455	1.09091
40	1.6	1.52727
59	1.41818	1.27273
76	1.70909	1.78182
89	3.05455	3.38182
101	2.07273	2.58182
130	13.8182	17.8909
133	1.70909	2.21818
143	4.87273	5.34545
150	8.47273	8.72727
157	10.4	11.5273
159	1.81818	1.6
171	7.2	7.63636
185	9.45455	13.4182
208	16.5818	19.5636
Dilution 0
Dilution 1
Dilution 2
	Inclination (m)	Doubling time [days]	Mean doubling time - first 2 dilutions [days]	Mean doubling time - both replicates [days]
Replicate 1 - Dilution 1	0.077	9.00191	13.0583	12.726
Replicate 1 - Dilution 2	0.0405	17.1147
Replicate 2 - Dilution 1	0.0697	9.94472	12.3936
Replicate 2 - Dilution 2	0.0467	14.8426

## Sheet: Tetradecane (C14)
Day	Sulfide tetradecane - replicate 1 [mM]	Sulfide tetradecane - replicate 2 [mM]
3	0.472727	0.4
13	0.981818	0.945455
26	0.945455	1.2
40	1.52727	1.56364
59	1.41818	2
76	1.85455	3.70909
89	2.98182	6.8
101	2.25455	8.18182
130	4.87273	13.9636
143	4.90909	15.9273
150	6.32727	17.0182
157	5.63636	14.1818
171	8.98182	18.5091
175	1.67273	1.16364
185	2.54545	2.8
208	6.43636	5.34545
230	12.3636	8.07273
232	0.981818	0.618182
249	3.81818	2.07273
265	6.90909	2.65455
277	8.72727	3.45455
298	12.5091	5.52727
319	14.1091	8.65455
Dilution 0
Dilution 1
Dilution 2
	Inclination (m)	Doubling time [days]	Mean doubling time - first 2 dilutions [days]	Mean doubling time - both replicates [days]
Replicate 1 - Dilution 1	0.0366	18.9384	21.7591	22.5032
Replicate 1 - Dilution 2	0.0282	24.5797
Replicate 2 - Dilution 1	0.0327	21.1972	23.2473
Replicate 2 - Dilution 2	0.0274	25.2973
