# Supplementary material for: Candidatus Alkanophaga archaea from heated hydrothermal vent sediment oxidize petroleum alkanes
Source: Research Square preprint supplement (doi:10.21203/rs.3.rs-2096998/v1), 2022-10-04
Supplement: Supplementary file 4 [file 5e757ea36e4237c778f6a29d.xlsx]

## Sheet: Sheet1
Cultures:
C6: sulfide (measured 2 days before H2 measurements): 14.6 mM, produced 6.73 mM sulfide in the last 21 days
C14: sulfide (measured 2 days before H2 measurements): 16.1 mM, produced 7.09 mM sulfide in the last 21 days
	Parts per million (ppm)		Millimolar (mM)						Parts per million (ppm)		Millimolar (mM)
time [h]	H2 - C6 (-)	H2 -C6 (Molybdate)	H2 - C6 (-)	H2 - C6 (Molybdate)	Sulfide produced	H2 - theoretical	% of sulfide production explained by H2 production		H2 - C14 (-)	H2 - C14 (Molybdate)	H2 - C14 (-)	H2 - C14 (Molybdate)	Sulfide produced	H2 - theoretical	% of sulfide production explained by H2 production
0	2.5	1.7	11.9298	8.11228	0	0			1.6	1.6	7.63509	7.63509	0	0
1	1.7	1.9	8.11228	9.06667	296.737	1186.95	0.763863		1.7	1.7	8.11228	8.11228	312.61	1250.44	0.648754
2	1.8	8.7	8.58947	41.5158	593.474	2373.9	1.74884		1.8	2	8.58947	9.54386	625.22	2500.88	0.38162
3	2	14.2	9.54386	67.7614	890.212	3560.85	1.90296		1.8	2.5	8.58947	11.9298	937.831	3751.32	0.318016
4	2.1	21	10.0211	100.211	1186.95	4747.8	2.11067		2.1	3.5	10.0211	16.7018	1250.44	5001.76	0.333917
5	2.1	26.5	10.0211	126.456	1483.69	5934.74	2.13078		2.3	4.2	10.9754	20.0421	1563.05	6252.2	0.320561
6	2.3	32	10.9754	152.702	1780.42	7121.69	2.14418		2.4	0.7	11.4526	3.34035	1875.66	7502.65	0.0445223
7	0.2	34.7	0.954386	165.586	2077.16	8308.64	1.99294		2.7	1	12.8842	4.77193	2188.27	8753.09	0.0545171
8	2.8	40	13.3614	190.877	2373.9	9495.59	2.01017		0.3	0.9	1.43158	4.29474	2500.88	10003.5	0.0429322
24	4.5	87.9	21.4737	419.453	7121.69	28486.8	1.47245		5.5	46.8	26.2456	223.326	7502.65	30010.6	0.744159
26	0.8	91.9	3.81754	438.54	7715.17	30860.7	1.42103		6.2	52.1	29.586	248.618	8127.87	32511.5	0.764707
28	7.9	92.6	37.6982	441.881	8308.64	33234.6	1.32958		1.1	58	5.24912	276.772	8753.09	35012.3	0.790498
30	8.3	97.5	39.607	465.263	8902.12	35608.5	1.30661		7.7	63.8	36.7439	304.449	9378.31	37513.2	0.811578
Vial size [ml]	156
Sample volume [ml]	20
Headspace volume [ml]	136
Headspace pressure [atm]	1
Headspace amount [mM]	4.77193
Sulfide production C6 [mM/day]	0.00712169
Sulfide production C6 [mM/hour]	296.737
Sulfide production C14 [mM/day]	0.00750265
Sulfide production C14 [mM/hour]	312.61
