# Supplementary material for: Candidatus Alkanophaga archaea from heated hydrothermal vent sediment oxidize petroleum alkanes
Source: Research Square preprint supplement (doi:10.21203/rs.3.rs-2096998/v1), 2022-10-04
Supplement: Supplementary file 5 [file 72c0a34c536e9122575e3880.xlsx]

## Sheet: Archaea
NCBI_organism	NCBI_accession
Methanocorpusculum_parvum	GCA_002287215.1_ASM228721v1
Methanocorpusculum_parvum_2	GCA_012513095.1_ASM1251309v1
Methanopyrus_kandleri_AV19	GCA_000007185.1_ASM718v1
Methanotorris_formicicus_Mc_S_70	GCA_000243455.2_ASM24345v2
Acidiplasma_cupricumulans_JCM_13668	GCA_001316225.1_ASM131622v1
Nitrosopumilus_maritimus_SCM1	GCA_000018465.1_ASM1846v1
Halorubrum_arcis_JCM_13916	GCA_000337015.1_ASM33701v1
Methanocella_paludicola_SANAE	GCA_000011005.1_ASM1100v1
Nitrososphaera_viennensis_EN76	GCA_000698785.1_ASM69878v1
Methanocella_conradii_HZ254	GCA_000251105.1_ASM25110v1
Methanococcoides_vulcani	GCA_900111645.1_IMG-taxon_2642422537_annotated_assembly
Methanococcoides_vulcani_2	GCA_900773955.1_Methanococcoides_vulcani_SLH33
Candidatus_Nitrosopelagicus_brevis	GCA_000812185.1_ASM81218v1
Candidatus_Nitrosopelagicus_brevis_2	GCA_003045125.1_CN25urea_metaspades
Candidatus_Nitrosopelagicus_brevis_3	GCA_012928565.1_ASM1292856v1
Methanosphaera_sp_WGK6	GCA_001729965.1_ASM172996v1
Candidatus_Methanoplasma_termitum	GCA_000800805.1_ASM80080v1
Methanosarcinales_archaeon_Methan_01	GCA_001602645.1_ASM160264v1
miscellaneous_Crenarchaeota_group_archaeon_SMTZ_80	GCA_001273495.1_ASM127349v1
candidate_division_MSBL1_archaeon_SCGC_AAA833K04	GCA_001549365.1_SCGC-AAA833K04
candidate_division_MSBL1_archaeon_SCGC_AAA259D14	GCA_001548915.1_SCGC-AAA259D14
candidate_division_MSBL1_archaeon_SCGC_AAA259E22	GCA_001548955.1_SCGC-AAA259E22
candidate_division_MSBL1_archaeon_SCGC_AAA259M10	GCA_001549115.1_SCGC-AAA259M10
candidate_division_MSBL1_archaeon_SCGC_AAA261F17	GCA_001549195.1_SCGC-AAA261F17
candidate_division_MSBL1_archaeon_SCGC_AAA385M11	GCA_001549355.1_SCGC-AAA385M11
Candidatus_Bathyarchaeota_archaeon_BA1	GCA_001399805.1_ASM139980v1
Candidatus_Bathyarchaeota_archaeon_BA2	GCA_001399795.1_ASM139979v1
Candidatus_Methanofastidiosum_methylthiophilus	GCA_001587575.1_ASM158757v1
Candidatus_Methanofastidiosum_methylthiophilus_2	GCA_001587595.1_ASM158759v1
Candidatus_Methanofastidiosum_methylthiophilus_3	GCA_001587605.1_ASM158760v1
Candidatus_Methanofastidiosum_methylthiophilus_4	GCA_001587635.1_ASM158763v1
Candidatus_Methanofastidiosum_methylthiophilus_5	GCA_001587655.1_ASM158765v1
Candidatus_Methanofastidiosum_methylthiophilus_6	GCA_001587675.1_ASM158767v1
Candidatus_Methanofastidiosum_methylthiophilus_7	GCA_001587695.1_ASM158769v1
Candidatus_Methanofastidiosum_methylthiophilus_8	GCA_001587715.1_ASM158771v1
Candidatus_Bathyarchaeota_archaeon_B24	GCA_001593865.1_ASM159386v1
Theionarchaea_archaeon_DG_70	GCA_001595795.1_ASM159579v1
Theionarchaea_archaeon_DG_70_1	GCA_001595815.1_ASM159581v1
Thermoplasmatales_archaeon_SG8_52_4	GCA_001595875.1_ASM159587v1
Methanocella_sp_PtaU1Bin125	GCA_002067315.1_ASM206731v1
Methanomassiliicoccales_archaeon_Mx_03	GCA_006954425.1_ASM695442v1
Candidatus_Syntrophoarchaeum_caldarius	GCA_001766815.1_ASM176681v1
Candidatus_Syntrophoarchaeum_butanivorans	GCA_001766825.1_ASM176682v1
Candidatus_Syntrophoarchaeum_butanivorans_2	GCA_011042965.1_ASM1104296v1
Candidatus_Syntrophoarchaeum_butanivorans_3	GCA_011052865.1_ASM1105286v1
Methanosphaera_sp_A6	GCA_001729395.1_ASM172939v1
Candidatus_Methanohalarchaeum_thermophilum	GCA_001914405.1_ASM191440v1
uncultured_Candidatus_Methanomethylophilus_sp	GCA_900313075.1_Rumen_uncultured_genome_RUG779
uncultured_Candidatus_Methanomethylophilus_sp_2	GCA_900314325.1_Rumen_uncultured_genome_hRUG898
Methanolinea_sp_UBA155	GCA_002509505.1_ASM250950v1
Methanomassiliicoccus_sp_UBA315	GCA_002503645.1_ASM250364v1
Methanococcaceae_archaeon_UBA115	GCA_002494795.1_ASM249479v1
Methanomassiliicoccaceae_archaeon_UBA328	GCA_002506905.1_ASM250690v1
Methanosarcinales_archaeon_UBA261	GCA_002506015.1_ASM250601v1
Thermoplasmatales_archaeon_UBA580	GCA_002497605.1_ASM249760v1
Thermoplasmatales_archaeon_UBA617	GCA_002507365.1_ASM250736v1
Methanonatronarchaeum_thermophilum	GCA_002153915.1_ASM215391v1
Candidatus_Bathyarchaeota_archaeon_JdFR_11	GCA_002011035.1_ASM201103v1
Methanopyrus_sp_SNP6	GCA_002201895.1_ASM220189v1
Methanosarcinales_archaeon_ex4484_138	GCA_002255135.1_ASM225513v1
Methanosarcinales_archaeon_ex4572_44	GCA_002254825.2_ASM225482v2
ANME_1_cluster_archaeon_ex4572_4	GCA_002254785.1_ASM225478v1
Methanophagales_archaeon	GCA_003194425.1_ASM319442v1
Methanophagales_archaeon_2	GCA_003194435.1_ASM319443v1
Methanophagales_archaeon_3	GCA_003336485.1_ASM333648v1
Methanophagales_archaeon_4	GCA_003601545.1_ASM360154v1
Methanophagales_archaeon_5	GCA_003601795.1_ASM360179v1
Methanophagales_archaeon_6	GCA_012962515.1_ASM1296251v1
Methanophagales_archaeon_7	GCA_013139985.1_ASM1313998v1
Methanophagales_archaeon_8	GCA_013374425.1_ASM1337442v1
Methanophagales_archaeon_9	GCA_013374505.1_ASM1337450v1
Methanophagales_archaeon_10	GCA_013374555.1_ASM1337455v1
Methanophagales_archaeon_11	GCA_013374565.1_ASM1337456v1
ANME_1_cluster_archaeon_GoMg2	GCA_013180585.1_ASM1318058v1
ANME_1_cluster_archaeon_GoMg1	GCA_013180605.1_ASM1318060v1
ANME_1_cluster_archaeon_AG_394_G21	GCA_009903435.1_ASM990343v1
candidate_division_MSBL1_archaeon	GCA_003555245.1_ASM355524v1
Candidatus_Methanofastidiosa_archaeon	GCA_003558335.1_ASM355833v1
Candidatus_Methanofastidiosa_archaeon_2	GCA_003563815.1_ASM356381v1
Candidatus_Methanofastidiosa_archaeon_3	GCA_012797645.1_ASM1279764v1
Candidatus_Methanofastidiosa_archaeon_4	GCA_012797855.1_ASM1279785v1
Candidatus_Methanofastidiosa_archaeon_5	GCA_012799835.1_ASM1279983v1
Methanonatronarchaeia_archaeon	GCA_003555005.1_ASM355500v1
Methanonatronarchaeia_archaeon_2	GCA_004212035.1_ASM421203v1
Candidatus_Syntrophoarchaeum_sp_WYZ_LMO15	GCA_003601555.1_ASM360155v1
Methanohalophilus_sp_RSK	GCA_003722075.1_MethanohalophilusRSK
Methanophagales_archaeon_ANME_1_THS	GCA_004212135.1_ASM421213v1
Candidatus_Methanoliparum_thermophilum	GCA_004212075.1_ASM421207v1
Candidatus_Methanolliviera_hydrocarbonicum	GCA_004212085.1_ASM421208v1
Candidatus_Methanolliviera_sp_GoM_oil	GCA_902158735.1_MOIL
Candidatus_Methanolliviera_sp_GoM_asphalt	GCA_902158745.1_MASP
Candidatus_Syntrophoarchaeum_sp_GoM_oil	GCA_902158755.1_SYNGOMJ08
Methanopyri_archaeon	GCA_013154335.1_ASM1315433v1
Candidatus_Methanoplasma_sp	GCA_009782125.1_ASM978212v1
Candidatus_Argoarchaeum_ethanivorans	GCA_004193545.1_ASM419354v1
Methanocellales_archaeon	GCA_013331355.1_ASM1333135v1
Candidatus_Methanofastidiosum_sp	GCA_013178285.1_ASM1317828v1
Candidatus_Methanofastidiosum_sp_2	GCA_013329085.1_ASM1332908v1

## Sheet: Bacteria
NCBI_organism	NCBI_accession
Desulfovibrio_desulfuricans_ATCC_27774	GCA_000022125.1_ASM2212v1
Desulfovibrio_vulgaris_str_Hildenborough	GCA_000195755.1_ASM19575v1
Desulfovibrio_vulgaris_str_Hildenborough_2	GCA_902167245.1_DSV_KAUST_v1
Thermodesulfobacterium_thermophilum_DSM_1276	GCA_000421605.1_ASM42160v1
Thermodesulfobacterium_commune_DSM_2178	GCA_000734015.1_ASM73401v1
Thermodesulfobacterium_commune_DSM_2178_2	GCA_000746435.1_ASM74643v1
Thermodesulfobacterium_hveragerdense_DSM_12571	GCA_000423845.1_ASM42384v1
Desulfonatronum_lacustre_DSM_10312	GCA_000519265.1_ASM51926v1
Thermodesulfobacterium_hydrogeniphilum	GCA_000746255.1_ASM74625v1
Thermodesulfatator_indicus_DSM_15286	GCA_000217795.1_ASM21779v1
Desulfopila_aestuarii_DSM_18488	GCA_900143695.1_IMG-taxon_2582581262_annotated_assembly
Thermodesulfatator_atlanticus_DSM_21156	GCA_000421585.1_ASM42158v1
Thermosulfurimonas_dismutans	GCA_001652585.1_ASM165258v1
Thermosulfurimonas_dismutans_2	GCA_011322625.1_ASM1132262v1
Acetothermia_bacterium_SCGC_AAA255_C06	GCA_000404965.1_ASM40496v1
Thermodesulfobacterium_geofontis_OPF15	GCA_000215975.1_ASM21597v1
Candidatus_Desulfofervidus_auxilii	GCA_001577525.1_ASM157752v1
Candidatus_Desulfofervidus_auxilii_2	GCA_011039335.1_ASM1103933v1
Candidatus_Desulfofervidus_auxilii_3	GCA_011039895.1_ASM1103989v1
Candidatus_Desulfofervidus_auxilii_4	GCA_011051585.1_ASM1105158v1
Candidatus_Desulfofervidus_auxilii_5	GCA_011052695.1_ASM1105269v1
Candidatus_Desulfofervidus_auxilii_6	GCA_011052795.1_ASM1105279v1
Thermodesulfobacterium_sp_37_54	GCA_001508775.1_ASM150877v1
Acetothermia_bacterium_64_32	GCA_001508155.1_ASM150815v1
Caldimicrobium_thiodismutans	GCA_001548275.1_ASM154827v1
Caldimicrobium_thiodismutans_2	GCA_002877875.1_ASM287787v1
Caldimicrobium_thiodismutans_3	GCA_011364275.1_ASM1136427v1
Caldimicrobium_thiodismutans_4	GCA_011369865.1_ASM1136986v1
Thermodesulfatator_autotrophicus	GCA_001642325.1_ASM164232v1
Desulfobacterales_bacterium_C00003060	GCA_001751085.1_ASM175108v1
Thermodesulfatator_sp	GCA_003978075.1_ASM397807v1
Thermodesulfatator_sp_2	GCA_003978135.1_ASM397813v1
Thermodesulfatator_sp_3	GCA_011322185.1_ASM1132218v1
Candidatus_Acetothermia_bacterium_JdFR_46	GCA_002011365.1_ASM201136v1
Candidatus_Acetothermia_bacterium_JdFR_47	GCA_002011415.1_ASM201141v1
Candidatus_Acetothermia_bacterium_JdFR_48	GCA_002011425.1_ASM201142v1
Candidatus_Acetothermia_bacterium_JdFR_49	GCA_002010355.1_ASM201035v1
Candidatus_Acetothermia_bacterium_JdFR_50	GCA_002010365.1_ASM201036v1
Candidatus_Acetothermia_bacterium_JdFR_51	GCA_002011435.1_ASM201143v1
Candidatus_Acetothermia_bacterium_JdFR_52	GCA_002010385.1_ASM201038v1
Thermosulfuriphilus_ammonigenes	GCA_011207455.1_ASM1120745v1
Acetothermia_bacterium_UBA2187	GCA_002328705.1_ASM232870v1
Acetothermia_bacterium_UBA3560	GCA_002376485.1_ASM237648v1
Acetothermia_bacterium_UBA3563	GCA_002376125.1_ASM237612v1
Acetothermia_bacterium_UBA3564	GCA_002376085.1_ASM237608v1
Acetothermia_bacterium_UBA3565	GCA_002376075.1_ASM237607v1
Acetothermia_bacterium_UBA3571	GCA_002375995.1_ASM237599v1
Acetothermia_bacterium_UBA3574	GCA_002375935.1_ASM237593v1
Acetothermia_bacterium_UBA4777	GCA_002403185.1_ASM240318v1
Acetothermia_bacterium_UBA4801	GCA_002402715.1_ASM240271v1
Acetothermia_bacterium_UBA7521	GCA_002479455.1_ASM247945v1
Desulfobacter_sp_UBA2225	GCA_002348205.1_ASM234820v1
Thermodesulfobacteriaceae_bacterium_UBA6232	GCA_002441555.1_ASM244155v1
Desulfobacteraceae_bacterium_UBA2130	GCA_002329025.1_ASM232902v1
Caldimicrobium_sp	GCA_009903935.1_ASM990393v1
Caldimicrobium_sp_2	GCA_011055415.1_ASM1105541v1
Caldimicrobium_sp_3	GCA_011334295.1_ASM1133429v1
Caldimicrobium_sp_4	GCA_011361835.1_ASM1136183v1
Caldimicrobium_sp_5	GCA_011362055.1_ASM1136205v1
Caldimicrobium_sp_6	GCA_011375865.1_ASM1137586v1
Candidatus_Bipolaricaulis_anaerobius	GCA_900465355.1_Ran1-1
Thermosulfurimonas_marina	GCA_012317585.1_ASM1231758v1
Candidatus_Acetothermia_bacterium	GCA_003445465.1_ASM344546v1
Candidatus_Acetothermia_bacterium_2	GCA_003485525.1_ASM348552v1
Candidatus_Acetothermia_bacterium_3	GCA_003485545.1_ASM348554v1
Candidatus_Acetothermia_bacterium_4	GCA_003535305.1_ASM353530v1
Candidatus_Acetothermia_bacterium_5	GCA_003545155.1_ASM354515v1
Candidatus_Acetothermia_bacterium_6	GCA_003551325.1_ASM355132v1
Candidatus_Acetothermia_bacterium_7	GCA_003552425.1_ASM355242v1
Candidatus_Acetothermia_bacterium_8	GCA_003553125.1_ASM355312v1
Candidatus_Acetothermia_bacterium_9	GCA_003562845.1_ASM356284v1
Candidatus_Acetothermia_bacterium_10	GCA_003563005.1_ASM356300v1
Candidatus_Acetothermia_bacterium_11	GCA_003563495.1_ASM356349v1
Candidatus_Acetothermia_bacterium_12	GCA_003566155.1_ASM356615v1
Candidatus_Acetothermia_bacterium_13	GCA_003567155.1_ASM356715v1
Candidatus_Acetothermia_bacterium_14	GCA_003648925.1_ASM364892v1
Candidatus_Acetothermia_bacterium_15	GCA_003648965.1_ASM364896v1
Candidatus_Acetothermia_bacterium_16	GCA_003648975.1_ASM364897v1
Candidatus_Acetothermia_bacterium_17	GCA_003650495.1_ASM365049v1
Candidatus_Acetothermia_bacterium_18	GCA_003650505.1_ASM365050v1
Candidatus_Acetothermia_bacterium_19	GCA_003650565.1_ASM365056v1
Candidatus_Acetothermia_bacterium_20	GCA_011038595.1_ASM1103859v1
Candidatus_Acetothermia_bacterium_21	GCA_011041075.1_ASM1104107v1
Candidatus_Acetothermia_bacterium_22	GCA_011042175.1_ASM1104217v1
Candidatus_Acetothermia_bacterium_23	GCA_011042375.1_ASM1104237v1
Candidatus_Acetothermia_bacterium_24	GCA_011042525.1_ASM1104252v1
Candidatus_Acetothermia_bacterium_25	GCA_011044065.1_ASM1104406v1
Candidatus_Acetothermia_bacterium_26	GCA_011048635.1_ASM1104863v1
Candidatus_Acetothermia_bacterium_27	GCA_011052735.1_ASM1105273v1
Candidatus_Acetothermia_bacterium_28	GCA_011057175.1_ASM1105717v1
Candidatus_Acetothermia_bacterium_29	GCA_011333125.1_ASM1133312v1
Candidatus_Acetothermia_bacterium_30	GCA_011362175.1_ASM1136217v1
Candidatus_Acetothermia_bacterium_31	GCA_011364065.1_ASM1136406v1
Candidatus_Acetothermia_bacterium_32	GCA_011366905.1_ASM1136690v1
Candidatus_Acetothermia_bacterium_33	GCA_011368365.1_ASM1136836v1
Candidatus_Acetothermia_bacterium_34	GCA_011371555.1_ASM1137155v1
Candidatus_Acetothermia_bacterium_35	GCA_011372235.1_ASM1137223v1
Candidatus_Acetothermia_bacterium_36	GCA_011372425.1_ASM1137242v1
Candidatus_Acetothermia_bacterium_37	GCA_011373065.1_ASM1137306v1
Candidatus_Acetothermia_bacterium_38	GCA_011375065.1_ASM1137506v1
Candidatus_Acetothermia_bacterium_39	GCA_011388625.1_ASM1138862v1
Candidatus_Acetothermia_bacterium_40	GCA_900768315.1_SRS476098_71
Thermodesulfobacteria_bacterium	GCA_003641595.1_ASM364159v1
Thermodesulfobacteria_bacterium_2	GCA_003641605.1_ASM364160v1
Thermodesulfobacteria_bacterium_3	GCA_003641645.1_ASM364164v1
Thermodesulfobacteria_bacterium_4	GCA_003644025.1_ASM364402v1
Thermodesulfobacteria_bacterium_5	GCA_003645605.1_ASM364560v1
Thermodesulfobacteria_bacterium_6	GCA_013153525.1_ASM1315352v1
Thermodesulfobacteria_bacterium_7	GCA_013153725.1_ASM1315372v1
Thermodesulfobacteria_bacterium_8	GCA_013154175.1_ASM1315417v1
Thermodesulfobacteria_bacterium_9	GCA_013154385.1_ASM1315438v1
Thermodesulfobacterium_sp_TA1	GCA_008630935.1_ASM863093v1
Desulfonatronovibrio_sp_MSAO_Bac4	GCA_003838125.1_ASM383812v1
Candidatus_Bipolaricaulota_bacterium	GCA_003979035.1_ASM397903v1
Candidatus_Bipolaricaulota_bacterium_2	GCA_012961285.1_ASM1296128v1
Candidatus_Bipolaricaulota_bacterium_3	GCA_012962795.1_ASM1296279v1
Candidatus_Bipolaricaulis_sibiricus	GCA_004102645.1_ASM410264v1
Thermodesulfobacteriales_bacterium	GCA_004525335.1_ASM452533v1
Thermodesulfobacteriaceae_bacterium	GCA_012961355.1_ASM1296135v1
Thermodesulfobacteriaceae_bacterium_2	GCA_012961845.1_ASM1296184v1
Desulfatitalea_sp	GCA_013041835.1_ASM1304183v1

## Sheet: mcrA
sequence_label	sequence_accession	NCBI_organism
OFV68676_IN6Gnc05_organism=BOX_GOM2_Contig_1	OFV68676	Candidatus Syntrophoarchaeum caldarius
RLG35499.1_methyl-coenzyme_M_reductase_subunit_alpha_Methanosarcinales_archaeon	RLG35499.1	Methanosarcinales archaeon
OFV67021_IN6Gnc00_organism=BOX_GOM1_Contig_1	OFV67021	Candidatus Syntrophoarchaeum butanivorans
RJS71678.1_coenzyme-B_sulfoethylthiotransferase_subunit_alpha_Candidatus_Syntrophoarchaeum_sp._WYZ-LMO15	RJS71678.1	Candidatus Syntrophoarchaeum sp. WYZ-LMO15
U_85862_NODE_2133_scaffold_21_Archaeglobi_Polytropus_marinifundus		Polytropus marinifundus
RLG38978.1_methyl-coenzyme_M_reductase_subunit_alpha_Methanosarcinales_archaeon	RLG38978.1	Methanosarcinales archaeon
KPV65186.1_Methyl-coenzyme_M_reductase_I_subunit_alpha_Candidatus_Bathyarchaeota_archaeon_BA1	KPV65186.1	Candidatus Bathyarchaeota archaeon BA1
KT387805_Gic00009	KT387805	uncultured Bathyarchaeota archaeon
KPV61791.1_Methyl-coenzyme_M_reductase_I_subunit_alpha_Candidatus_Bathyarchaeota_archaeon_BA2	KPV61791.1	Candidatus Bathyarchaeota archaeon BA2
KT387806_Gic00008	KT387806	uncultured Bathyarchaeota archaeon
KT387810_Gic00021	KT387810	uncultured archaeon
TDA31058.1_methyl-coenzyme_M_reductase_subunit_alpha_Hadesarchaea_archaeon	TDA31058.1	Hadesarchaea archaeon
SUPS01000022.1_20Hel_GB_A_McrA	SUPS01000022.1	Candidatus Helarchaeota ASGARD archaeon Hel_GB_A
SUPS01000008.1_19Hel_GB_A_McrA	SUPS01000008.1	Candidatus Helarchaeota ASGARD archaeon Hel_GB_A
MCR_A_D-C06_oil_16re_NODE_32	VUT24756.1	Candidatus Methanolliviera sp. GoM_oil
RZN64248.1_coenzyme-B_sulfoethylthiotransferase_subunit_alpha_Euryarchaeota_archaeon_NM1a	RZN64248.1	Candidatus Methanoliparum thermophilum
OFV67100_IN6Gnc08_organism=BOX_GOM2_Contig_8	OFV67100	Candidatus Syntrophoarchaeum caldarius
OFV65745_organism=BOX_GOM1_Contig_7.1	OFV65745	Candidatus Syntrophoarchaeum butanivorans
RJS72636.1_coenzyme-B_sulfoethylthiotransferase_subunit_alpha_Candidatus_Syntrophoarchaeum_sp._WYZ-LMO15	RJS72636.1	Candidatus Syntrophoarchaeum sp. WYZ-LMO15
OFV68281_IN6Gnc06_organism=BOX_GOM2_Contig_2	OFV68281	Candidatus Syntrophoarchaeum caldarius
RLG32975.1_methyl-coenzyme_M_reductase_subunit_alpha_Methanosarcinales_archaeon	RLG32975.1	Methanosarcinales archaeon
OFV66176_IN6Gnc02_organism=BOX_GOM1_Contig_3	OFV66176	Candidatus Syntrophoarchaeum butanivorans
RJS73394.1_coenzyme-B_sulfoethylthiotransferase_subunit_alpha_Candidatus_Syntrophoarchaeum_sp._WYZ-LMO15	RJS73394.1	Candidatus Syntrophoarchaeum sp. WYZ-LMO15
RLG37785.1_methyl-coenzyme_M_reductase_subunit_alpha_Methanosarcinales_archaeon	RLG37785.1	Methanosarcinales archaeon
U_85862_NODE_1051_scaffold_2_Archaeoglobi_Polytropus_marinifundus
OFV65760_IN6Gnc04_organism=BOX_GOM1_Contig_7.2	OFV65760	Candidatus Syntrophoarchaeum butanivorans
RJS73045.1_coenzyme-B_sulfoethylthiotransferase_subunit_alpha_Candidatus_Syntrophoarchaeum_sp._WYZ-LMO15	RJS73045.1	Candidatus Syntrophoarchaeum sp. WYZ-LMO15
OFV67773_IN6Gnc07_organism=BOX_GOM2_Contig_3	OFV67773	Candidatus Syntrophoarchaeum caldarius
RLG34810.1_methyl-coenzyme_M_reductase_subunit_alpha_Methanosarcinales_archaeon	RLG34810.1	Methanosarcinales archaeon
RLF08185.1_coenzyme-B_sulfoethylthiotransferase_subunit_alpha_partial_Thermoprotei_archaeon	RLF08185.1	Thermoprotei archaeon
TDA35900.1_TDA34547.1_coenzyme-B_sulfoethylthiotransferase_subunit_alpha_TACK_group_Nezhaarchaeota_WYZ_LMO7_LMO8	TDA35900.1	Candidatus Nezhaarchaeota archaeon WYZ-LMO7
MAGT01000008.1_103_V1_MAGS01000030.1_94_V2_Verstraetearchaeota_V1	MAGT01000008.1	Candidatus Methanomethylicus mesodigestus
MAGU01000068.1_30_Vestraetearchaeota_V3	MAGU01000068.1	Candidatus Methanomethylicus oleisabuli
RZN57862.1_coenzyme-B_sulfoethylthiotransferase_subunit_alpha_Candidatus_Verstraetearchaeota_archaeon	RZN57862.1	Candidatus Verstraetearchaeota archaeon
MAGV01000073.1_10_Vestraetearchaeota_V4	MAGV01000073.1	Candidatus Methanosuratincola petrocarbonis
WP_125672267.1_coenzyme-B_sulfoethylthiotransferase_subunit_alpha_Candidatus_Methanodesulfokores_washburnensis	WP125672267.1	Candidatus Methanodesulfokores washburnensis
TDA25649.1_coenzyme-B_sulfoethylthiotransferase_subunit_alpha_Archaeoglobi_archaeon	TDA25649.1	Archaeoglobi archaeon
TDA30809.1_TDA25962.1_coenzyme-B_sulfoethylthiotransferase_subunit_alpha_Archaeoglobi_archaeon	TDA30809.1	Archaeoglobi archaeon
AAA72197_MmsFer11_organism=Methanothermus_fervidus	AAA72197	Methanothermus fervidus
YP_004004345_MmsFerv4_organism=Methanothermus_fervidus	YP4004345	Methanothermus fervidus DSM 2088
YP_003424666_MbvRumi4_organism=Methanobrevibacter_ruminantium	YP3424666	Methanobrevibacter ruminantium M1
AHY86397.1_methyl_coenzyme-M_reductase_Methanobrevibacter_sp._YLM1	AHY86397.1	Methanobrevibacter sp. YLM1
WP_019264905_MbvSmi13_organism=Methanobrevibacter_smithii	WP19264905	Methanobrevibacter smithii
WP_049780206.1_coenzyme-B_sulfoethylthiotransferase_subunit_alpha_Methanobrevibacter_smithii	WP49780206.1	Methanobrevibacter
WP_048202874.1_coenzyme-B_sulfoethylthiotransferase_subunit_alpha_Methanobrevibacter_smithii	WP48202874.1	Methanobrevibacter smithii
WP_100815688.1_coenzyme-B_sulfoethylthiotransferase_subunit_alpha_Methanobrevibacter_smithii	WP100815688.1	Methanobrevibacter smithii
WP_019262578.1_coenzyme-B_sulfoethylthiotransferase_subunit_alpha_Methanobrevibacter_smithii	WP19262578.1	Methanobrevibacter smithii
WP_011954235.1_coenzyme-B_sulfoethylthiotransferase_subunit_alpha_Methanobrevibacter	WP11954235.1	Methanobrevibacter
WP_004035797_MbvSmi14_organism=Methanobrevibacter_smithii	WP4035797	Methanobrevibacter smithii
EFC93211.1_methyl-coenzyme_M_reductase_alpha_subunit_Methanobrevibacter_smithii_DSM_2374	EFC93211.1	Methanobrevibacter smithii DSM 2374
KZX10527.1_hypothetical_protein_MBORA_18580_Methanobrevibacter_oralis	KZX10527.1	Methanobrevibacter oralis
SEK31499.1_methyl-coenzyme_M_reductase_alpha_subunit_Methanobrevibacter_gottschalkii	SEK31499.1	Methanobrevibacter gottschalkii
WP_069575737.1_coenzyme-B_sulfoethylthiotransferase_subunit_alpha_Methanobrevibacter	WP69575737.1	Methanobrevibacter
WP_067044659.1_coenzyme-B_sulfoethylthiotransferase_subunit_alpha_Methanobrevibacter_sp._YE315	WP67044659.1	Methanobrevibacter sp. YE315
AHY86394_MbvSpe24_organism=Methanobrevibacter_sp.	AHY86394	Methanobrevibacter sp. D5
WP_058739998.1_coenzyme-B_sulfoethylthiotransferase_subunit_alpha_Methanobrevibacter_millerae	WP58739998.1	Methanobrevibacter millerae
YP_008075839_MbvSpe25_organism=Methanobrevibacter_sp.	YP8075839	Methanobrevibacter sp. AbM4
WP_040682084.1_coenzyme-B_sulfoethylthiotransferase_subunit_alpha_Methanobrevibacter_boviskoreani	WP40682084.1	Methanobrevibacter boviskoreani
OWT33390.1_coenzyme-B_sulfoethylthiotransferase_subunit_alpha_Methanobrevibacter_sp._87.7	OWT33390.1	Methanobrevibacter sp. 87.7
WP_042708239.1_coenzyme-B_sulfoethylthiotransferase_subunit_alpha_Methanobrevibacter_wolinii	WP42708239.1	Methanobrevibacter wolinii
KZX14437.1_hypothetical_protein_MBCUR_04850_Methanobrevibacter_curvatus	KZX14437.1	Methanobrevibacter curvatus
KZX11644.1_hypothetical_protein_MBFIL_13670_Methanobrevibacter_filiformis	KZX11644.1	Methanobrevibacter filiformis
KZX17247.1_hypothetical_protein_MBCUT_02940_Methanobrevibacter_cuticularis	KZX17247.1	Methanobrevibacter cuticularis
WP_054834881.1_coenzyme-B_sulfoethylthiotransferase_subunit_alpha_Methanobrevibacter_arboriphilus	WP54834881.1	Methanobrevibacter arboriphilus
WP_042703044.1_coenzyme-B_sulfoethylthiotransferase_subunit_alpha_Methanobrevibacter_arboriphilus	WP42703044.1	Methanobrevibacter arboriphilus
WP_080459572.1_coenzyme-B_sulfoethylthiotransferase_subunit_alpha_Methanobrevibacter_arboriphilus	WP80459572.1	Methanobrevibacter arboriphilus
BAW31874.1_methyl-coenzyme_M_reductase_I_subunit_alpha_Methanothermobacter_sp._MT-2	BAW31874.1	Methanothermobacter sp. MT-2
WP_008514009_MhbSpe21_organism=Methanobacterium_sp.	WP8514009	Methanobacterium sp. Maddingley MBC34
WP_004031277_MhbForm9_organism=Methanobacterium_formicicum	WP4031277	Methanobacterium formicicum
YP_008916519_MhbSpe20_organism=Methanobacterium_sp.	YP8916519	Methanobacterium sp. MB1
CEL25616.1_Methyl-coenzyme_M_reductase_subunit_alpha_Methanobacterium_formicicum	CEL25616.1	Methanobacterium formicicum
WP_100905596.1_coenzyme-B_sulfoethylthiotransferase_subunit_alpha_Methanobacterium	WP100905596.1	Methanobacterium
YP_004289577_MhbLacu3_organism=Methanobacterium_lacus	YP4289577	Methanobacterium lacus
WP_048191628.1_coenzyme-B_sulfoethylthiotransferase_subunit_alpha_Methanobacterium_sp._SMA-27	WP48191628.1	Methanobacterium sp. SMA-27
5A8KA_Chain_A_Methyl-coenzyme_M_Reductase_Methanothermobacter_Wolfeii	5A8K_A	Methanothermobacter wolfeii
WP_074359432.1_coenzyme-B_sulfoethylthiotransferase_subunit_alpha_Methanothermobacter_wolfeii	WP74359432.1	Methanothermobacter sp. THM-1
5G0RA_Chain_A_Methyl-coenzyme_M_Reductase_I_Methanothermobacter_Marburgensis	5G0R_A	Methanothermobacter marburgensis
3POTD_Chain_A_Methyl-coenzyme_M_Reductase_Methanothermobacter_Marburgensis	3POT_D	Methanothermobacter marburgensis
CAA30639_MhtThe13_organism=Methanothermobacter_thermautotrophicus	CAA30639	Methanothermobacter thermautotrophicus
1HBU_D_MhtThe30_organism=Methanothermobacter_thermautotrophicus	1HBU_D	Methanothermobacter marburgensis str. Marburg
1MRO_D_MhtThe27_organism=Methanothermobacter_thermautotrophicus	1MRO_D	Methanothermobacter marburgensis str. Marburg
AAB85653_Methanothermobacter_thermautotrophicus	AAB85653	Methanothermobacter thermautotrophicus str. Delta H
AAA73445_MhtThe14_organism=Methanothermobacter_thermautotrophicus	AAA73445	Methanothermobacter thermautotrophicus
WP_048175731.1_coenzyme-B_sulfoethylthiotransferase_subunit_alpha_Methanothermobacter_sp._CaT2	WP48175731.1	Methanothermobacter sp. CaT2
BAZ99180.1_hypothetical_protein_tca_01121_Methanothermobacter_sp._EMTCatA1	BAZ99180.1	Methanothermobacter sp. EMTCatA1
PAV02920.1_methyl-coenzyme_M_reductase_subunit_alpha_Methanobacterium_bryantii	PAV02920.1	Methanobacterium bryantii
WP_048081846.1_coenzyme-B_sulfoethylthiotransferase_subunit_alpha_Methanobacterium	WP48081846.1	Methanobacterium
PKL66830.1_coenzyme-B_sulfoethylthiotransferase_subunit_alpha_Methanobacteriales_HGW-1	PKL66830.1	Methanobacteriales archaeon HGW-Methanobacteriales-1
YP_004520866_MhbPalud_organism=Methanobacterium_paludis	YP4520866	Methanobacterium paludis
WP_071907585.1_coenzyme-B_sulfoethylthiotransferase_subunit_alpha_Methanobacterium_congolense	WP71907585.1	Methanobacterium congolense
WP_088335801.1_coenzyme-B_sulfoethylthiotransferase_subunit_alpha_Methanopyrus_sp._KOL6	WP88335801.1	Methanopyrus sp. KOL6
Q49605_MnrKand7_organism=Methanopyrus_kandleri	Q49605	Methanopyrus kandleri AV19
AAB02003_MnrKand6_organism=Methanopyrus_kandleri	AAB02003	Methanopyrus kandleri
AHY86396.1_methyl_coenzyme-M_reductase_Methanosphaera_sp._ISO3-F5	AHY86396.1	Methanosphaera sp. ISO3-F5
WP_069592666.1_coenzyme-B_sulfoethylthiotransferase_subunit_alpha_Methanosphaera_sp._WGK6	WP69592666.1	Methanosphaera sp. WGK6
ABC56731_MshStad8_organism=Methanosphaera_stadtmanae	ABC56731	Methanosphaera stadtmanae DSM 3091
CAE48306_MshStad9_organism=Methanosphaera_stadtmanae	CAE48306	Methanosphaera stadtmanae DSM 3091
WP_095608312.1_coenzyme-B_sulfoethylthiotransferase_subunit_alpha_Methanosphaera_cuniculi	WP95608312.1	Methanosphaera cuniculi
AHY86398.1_methyl_coenzyme-M_reductase_Methanobrevibacter_sp._YLM1	AHY86398.1	Methanobrevibacter sp. YLM1
WP_074797980.1_coenzyme-B_sulfoethylthiotransferase_subunit_alpha_Methanobrevibacter_olleyae	WP74797980.1	Methanobrevibacter olleyae
YP_001273475_MbvSmi12_organism=Methanobrevibacter_smithii	YP1273475	Methanobrevibacter smithii ATCC 35061
WP_042694806.1_coenzyme-B_sulfoethylthiotransferase_subunit_alpha_Methanobrevibacter_oralis	WP42694806.1	Methanobrevibacter oralis
WP_069575111.1_coenzyme-B_sulfoethylthiotransferase_subunit_alpha_Methanobrevibacter	WP69575111.1	Methanobrevibacter
AHY86395_MbvSpe23_organism=Methanobrevibacter_sp.	AHY86395	Methanobrevibacter sp. D5
AHY86400.1_methyl_coenzyme-M_reductase_Methanobrevibacter_sp._SM9	AHY86400.1	Methanobrevibacter sp. SM9
PKL66143.1_coenzyme-B_sulfoethylthiotransferase_subunit_alpha_Methanobacteriales_HGW-1	PKL66143.1	Methanobacteriales archaeon HGW-Methanobacteriales-1
WP_018154763_MhnTher3_organism=Methanothermococcus_thermolithotrophicus	WP18154763	Methanothermococcus thermolithotrophicus
YP_003247534_MhdVulc5_organism=Methanocaldococcus_vulcanius	YP3247534	Methanocaldococcus vulcanius M7
AIJ05353_MhdSpec6_organism=Methanocaldococcus_sp.	AIJ05353	Methanocaldococcus bathoardescens
AAB98851_Methanocaldococcus_jannaschii_DSM_2661	AAB98851	Methanocaldococcus jannaschii DSM 2661
YP_003457854_MhdSpec9_organism=Methanocaldococcus_sp.	YP3457854	Methanocaldococcus sp. FS406-22
YP_004484066_MtrIgne4_organism=Methanotorris_igneus_strain=Kol_5	YP4484066	Methanotorris igneus Kol 5
WP_007044524_MtrForm5_organism=Methanotorris_formicicus	WP7044524	Methanotorris formicicus
WP_048115624.1_coenzyme-B_sulfoethylthiotransferase_subunit_alpha_Methanotorris_formicicus	WP48115624.1	Methanotorris formicicus
CAA50044_Methanothermus_fervidus	CAA50044	Methanothermus fervidus DSM 2088
YP_004004295_MmsFerv5_organism=Methanothermus_fervidus	YP4004295	Methanothermus fervidus DSM 2088
5A8RA_Chain_A_Methyl-coenzyme_M_Reductase_Methanothermobacter_Marburgensis	5A8RA	Methanothermobacter marburgensis
YP_003850404_MhtMarb3_organism=Methanothermobacter_marburgensis	YP3850404	Methanothermobacter marburgensis str. Marburg
AAB85618_MCR-A_II_Methanothermobacter_thermautotrophicus	AAB85618	Methanothermobacter thermautotrophicus str. Delta H
BAZ99144.1_hypothetical_protein_tca_01085_Methanothermobacter_sp._EMTCatA1	BAZ99144.1	Methanothermobacter sp. EMTCatA1
WP_048175703.1_coenzyme-B_sulfoethylthiotransferase_subunit_alpha_Methanothermobacter_sp._CaT2	WP48175703.1	Methanothermobacter
AAA73439_MhtThe18_organism=Methanothermobacter_thermautotrophicus_strain_GB_delta_H	AAA73439	Methanothermobacter thermautotrophicus
5A8WA_Chain_A_Methyl-coenzyme_M_Reductase_Methanothermobacter_Wolfeii	5A8WA	Methanothermobacter wolfeii
WP_074359401.1_coenzyme-B_sulfoethylthiotransferase_subunit_alpha_Methanothermobacter_wolfeii	WP74359401.1	Methanothermobacter sp. THM-1
WP_008513191_MhbSpe19_organism=Methanobacterium_sp.	WP8513191	Methanobacterium sp. Maddingley MBC34
WP_100905456.1_coenzyme-B_sulfoethylthiotransferase_subunit_alpha_Methanobacterium	WP100905456.1	Methanobacterium
YP_008916650_MhbSpe18_organism=Methanobacterium_sp.	YP8916650	Methanobacterium sp. MB1
CEL25802.1_Methyl-coenzyme_M_reductase_II_subunit_alpha_Methanobacterium_formicicum	CEL25802.1	Methanobacterium formicicum
WP_048072649.1_coenzyme-B_sulfoethylthiotransferase_subunit_alpha_Methanobacterium_formicicum	WP48072649.1	Methanobacterium formicicum
WP_004029250_MhbForm8_organism=Methanobacterium_formicicum	WP4029250	Methanobacterium formicicum
YP_004291467_MhbLacu2_organism=Methanobacterium_lacus	YP4291467	Methanobacterium lacus
WP_069583361.1_coenzyme-B_sulfoethylthiotransferase_subunit_alpha_Methanobacterium	WP69583361.1	Methanobacterium
WP_048080940.1_coenzyme-B_sulfoethylthiotransferase_subunit_alpha_Methanobacterium	WP48080940.1	Methanobacterium
CAA30633_MeuVolt6_organism=Methanococcus_voltae	CAA30633	Methanococcus voltae PS
YP_003707758_MeuVolt5_organism=Methanococcus_voltae	YP3707758	Methanococcus voltae A3
1307300C_MeuVann8_organism=Methanococcus_vannielii	1307300C	Methanococcus vannielii
AAA72598_MeuVann7_organism=Methanococcus_vannielii	AAA72598	Methanococcus vannielii
ZP_01702953_MeuVan10_organism=Methanococcus_vannielii	WP11977191.1	Methanococcus maripaludis
CAF31115_MeuMar21_organism=Methanococcus_maripaludis	CAF31115	Methanococcus maripaludis S2
YP_004743325_MeuMar19_organism=Methanococcus_maripaludis	YP4743325	Methanococcus maripaludis X1
YP_001549157_MeuMar17_organism=Methanococcus_maripaludis	YP1549157	Methanococcus maripaludis C6
ABO34334_MeuMar20_organism=Methanococcus_maripaludis	ABO34334	Methanococcus maripaludis C5
WP_018153522_MhnTher2_organism=Methanothermococcus_thermolithotrophicus	WP18153522	Methanothermococcus thermolithotrophicus
5N1QA_Chain_A_Methyl-coenzyme_M_Reductase_Methanothermococcus_Thermolithotrophicus	5N1Q_A	Methanothermococcus thermolithotrophicus
YP_004576704_MhnOkin4_organism=Methanothermococcus_okinawensis	YP4576704	Methanothermococcus okinawensis IH1
WP_017981119_MhdVill2_organism=Methanocaldococcus_villosus	WP17981119	Methanocaldococcus villosus
WP_004590263.1_coenzyme-B_sulfoethylthiotransferase_subunit_alpha_Methanocaldococcus_villosus	WP4590263.1	Methanocaldococcus villosus
YP_003615915_MhdInfe4_organism=Methanocaldococcus_infernus	YP3615915	Methanocaldococcus infernus ME
YP_003246499_MhdVulc4_organism=Methanocaldococcus_vulcanius	YP3246499	Methanocaldococcus vulcanius M7
WP_048202038.1_coenzyme-B_sulfoethylthiotransferase_subunit_alpha_Methanocaldococcus_bathoardescens	WP48202038.1	Methanocaldococcus bathoardescens
YP_003128256_MhdFerv4_organism=Methanocaldococcus_fervens	YP3128256	Methanocaldococcus fervens AG86
YP_003458728_MhdSpec8_organism=Methanocaldococcus_sp.	YP3458728	Methanocaldococcus sp. FS406-22
AAB98063_MCR-A_II_Methanocaldococcus_jannaschii_DSM_2661	AAB98063	Methanocaldococcus jannaschii DSM 2661
F64405_MhdJan10_organism=Methanocaldococcus_jannaschii	F64405	Methanocaldococcus jannaschii
YP_004484839_MtrIgne3_organism=Methanotorris_igneus	YP4484839	Methanotorris igneus Kol 5
WP_007043982_MtrForm4_organism=Methanotorris_formicicus	WP7043982	Methanotorris formicicus
5N28A_Chain_A_Methyl-coenzyme_M_Reductase_Methanotorris_Formicicus	5N28_A	Methanotorris formicicus Mc-S-70
ZP_01799496_MeuAeol7_organism=Methanococcus_aeolicus_strain_GB_Nankai-3	AAQ63481.1	Methanococcus aeolicus
AAU83007_Unc03d9g_organism=uncultured_archaeon_clone_GB_GZfos26B2	AAU83007	uncultured archaeon GZfos26B2
AAQ63481_IMCRiver_organism=Eel_River_Basin_clone_GZfos35D7	AAQ63481	uncultured archaeon
ABK14360_Methanothrix_thermoacetophila	ABK14360	Methanothrix thermoacetophila PT
YP_004383383_MtsConc6_organism=Methanosaeta_concilii	YP4383383	Methanosaeta concilii GP6
OYV13241.1_methyl-coenzyme_M_reductase_alpha_subunit_Methanosaeta_sp._ASO1	OYV13241.1	Methanosaeta sp. ASO1
OYV09333.1_methyl-coenzyme_M_reductase_alpha_subunit_Methanosaeta_sp._NSP1	OYV09333.1	Methanosaeta sp. NSP1
APO18219.1_methyl_coenzyme-M_reductase_subunit_A_partial_uncultured_archaeon	APO18219.1	uncultured archaeon
APO18211.1_methyl_coenzyme-M_reductase_subunit_A_partial_uncultured_archaeon	APO18211.1	uncultured archaeon
APO18198.1_methyl_coenzyme-M_reductase_subunit_A_partial_uncultured_archaeon	APO18198.1	uncultured archaeon
YP_005919503_MtsHaru4_organism=Methanosaeta_harundinacea	YP5919503	Methanosaeta harundinacea 6Ac
YP_007248437_MtgForm4_organism=Methanoregula_formicica	YP7248437	Methanoregula formicica SMSP
WP_048111146.1_coenzyme-B_sulfoethylthiotransferase_subunit_alpha_Methanoregula_formicica	WP48111146.1	Methanoregula formicica
WP_042697841.1_coenzyme-B_sulfoethylthiotransferase_subunit_alpha_Methanocorpusculum_bavaricum	WP42697841.1	Methanocorpusculum bavaricum
WP_042699351.1_coenzyme-B_sulfoethylthiotransferase_subunit_alpha_Methanocorpusculum_bavaricum	WP42699351.1	Methanocorpusculum bavaricum
WP_095642342.1_coenzyme-B_sulfoethylthiotransferase_subunit_alpha_partial_Methanocorpusculum_parvum	WP95642342.1	Methanocorpusculum parvum
ABN07725_Methanocorpusculum_labreanum_Z	ABN07725	Methanocorpusculum labreanum Z
ABN07237_Methanocorpusculum_labreanum_Z	ABN07237	Methanocorpusculum labreanum Z
WP_042705994.1_coenzyme-B_sulfoethylthiotransferase_subunit_alpha_Methanomicrobium_mobile	WP42705994.1	Methanomicrobium mobile
WP_004079635_MhsLimi3_organism=Methanoplanus_limicola	WP4079635	Methanoplanus limicola
YP_003895599_MhsPetr5_organism=Methanoplanus_petrolearius	YP3895599	Methanolacinia petrolearia DSM 11571
WP_048152823.1_coenzyme-B_sulfoethylthiotransferase_subunit_alpha_partial_Methanolacinia_paynteri	WP48152823.1	Methanolacinia paynteri
WP_062396498.1_coenzyme-B_sulfoethylthiotransferase_subunit_alpha_Methanogenium_cariaci	WP62396498.1	Methanogenium cariaci
APO18215.1_methyl_coenzyme-M_reductase_subunit_A_partial_uncultured_archaeon	APO18215.1	uncultured archaeon
APO18213.1_methyl_coenzyme-M_reductase_subunit_A_partial_uncultured_archaeon	APO18213.1	uncultured archaeon
CVK33165.1_Methyl-coenzyme_M_reductase_I_subunit_alpha_Methanoculleus_sp._MAB1	CVK33165.1	Methanoculleus bourgensis
WP_062263961.1_coenzyme-B_sulfoethylthiotransferase_subunit_alpha_Methanoculleus_sp._MAB1	WP62263961.1	Methanoculleus bourgensis
YP_006545160_MtcBour7_organism=Methanoculleus_bourgensis	YP6545160	Methanoculleus bourgensis MS2
WP_074174927.1_coenzyme-B_sulfoethylthiotransferase_subunit_alpha_Methanoculleus_bourgensis	WP74174927.1	Methanoculleus bourgensis
WP_048179676.1_coenzyme-B_sulfoethylthiotransferase_subunit_alpha_Methanoculleus_sediminis	WP48179676.1	Methanoculleus sediminis
WP_066957677.1_coenzyme-B_sulfoethylthiotransferase_subunit_alpha_Methanoculleus_thermophilus	WP66957677.1	Methanoculleus thermophilus
WP_074369714.1_coenzyme-B_sulfoethylthiotransferase_subunit_alpha_Methanoculleus_chikugoensis	WP74369714.1	Methanoculleus chikugoensis
WP_011843221.1_Methanoculleus_marisnigri	WP11843221.1	Methanoculleus marisnigri
WP_067078350.1_coenzyme-B_sulfoethylthiotransferase_subunit_alpha_Methanoculleus_horonobensis	WP67078350.1	Methanoculleus horonobensis
WP_048114200.1_coenzyme-B_sulfoethylthiotransferase_subunit_alpha_Methanoculleus_sp._MH98A	WP48114200.1	Methanoculleus sp. MH98A
AEV59717.1_methyl-coenzyme_M_reductase_subunit_A_uncultured_archaeon	AEV59717.1	uncultured archaeon
WP_048114231.1_coenzyme-B_sulfoethylthiotransferase_subunit_alpha_Methanoculleus_sp._MH98A	WP48114231.1	Methanoculleus sp. MH98A
WP_067074736.1_coenzyme-B_sulfoethylthiotransferase_subunit_alpha_Methanoculleus_horonobensis	WP67074736.1	Methanoculleus horonobensis
WP_048180309.1_coenzyme-B_sulfoethylthiotransferase_subunit_alpha_Methanoculleus_sediminis	WP48180309.1	Methanoculleus sediminis
YP_001046528_MtcMari6_organism=Methanoculleus_marisnigri	YP1046528	Methanoculleus marisnigri JR1
WP_074370629.1_coenzyme-B_sulfoethylthiotransferase_subunit_alpha_Methanoculleus_chikugoensis	WP74370629.1	Methanoculleus chikugoensis
PKL62129.1_methyl-coenzyme_M_reductase_subunit_alpha_Methanomicrobiales_archaeon_HGW-Methanomicrobiales-2	PKL62129.1	Methanomicrobiales archaeon HGW-Methanomicrobiales-2
WP_066957227.1_coenzyme-B_sulfoethylthiotransferase_subunit_alpha_Methanoculleus_thermophilus	WP66957227.1	Methanoculleus thermophilus
WP_062264453.1_coenzyme-B_sulfoethylthiotransferase_subunit_alpha_Methanoculleus_sp._MAB1	WP62264453.1	Methanoculleus bourgensis
WP_074175723.1_coenzyme-B_sulfoethylthiotransferase_subunit_alpha_Methanoculleus_bourgensis	WP74175723.1	Methanoculleus bourgensis
YP_006545377_MtcBour6_organism=Methanoculleus_bourgensis	YP6545377	Methanoculleus bourgensis MS2
WP_004039455_MtfLimi4_organism=Methanofollis_liminatans	WP4039455	Methanofollis liminatans
WP_067049872.1_coenzyme-B_sulfoethylthiotransferase_subunit_alpha_Methanofollis_ethanolicus	WP67049872.1	Methanofollis ethanolicus
WP_004037742_MtfLimi5_organism=Methanofollis_liminatans	WP4037742	Methanofollis liminatans
WP_067052907.1_coenzyme-B_sulfoethylthiotransferase_subunit_alpha_Methanofollis_ethanolicus	WP67052907.1	Methanofollis ethanolicus
YP_003895179_MhsPetr4_organism=Methanoplanus_petrolearius	YP3895179	Methanolacinia petrolearia DSM 11571
WP_048153025.1_coenzyme-B_sulfoethylthiotransferase_subunit_alpha_Methanolacinia_paynteri	WP48153025.1	Methanolacinia paynteri
KUL02431.1_Methyl-coenzyme_M_reductase_alpha_subunit_Methanomicrobiales_archaeon_53_19	KUL02431.1	Methanomicrobiales archaeon 53_19
APO18212.1_methyl_coenzyme-M_reductase_subunit_A_partial_uncultured_archaeon	APO18212.1	uncultured archaeon
ABD41854_Methanospirillum_hungatei_JF-1	ABD41854	Methanospirillum hungatei JF-1
WP_007314361.1_coenzyme-B_sulfoethylthiotransferase_subunit_alpha_Methanolinea_tarda	WP7314361.1	Methanolinea tarda
YP_002467317_MprPalu5_organism=Methanosphaerula_palustris	YP2467317	Methanosphaerula palustris E1-9c
YP_001403743_MtgBoon6_organism=Methanoregula_boonei	YP1403743	Methanoregula boonei 6A8
PKG32638.1_coenzyme-B_sulfoethylthiotransferase_subunit_alpha_partial_Methanoregula_sp.	PKG32638.1	Methanoregula sp.
PKL65387.1_coenzyme-B_sulfoethylthiotransferase_subunit_alpha_Methanomicrobiales_HGW-3	PKL65387.1	Methanomicrobiales archaeon HGW-Methanomicrobiales-3
PKL69262.1_coenzyme-B_sulfoethylthiotransferase_subunit_alpha_Methanomicrobiales_HGW-1	PKL69262.1	Methanomicrobiales archaeon HGW-Methanomicrobiales-1
YP_007250108_MtgForm3_organism=Methanoregula_formicica	YP7250108	Methanoregula formicica SMSP
AFI62041.1_methyl_coenzyme_M_reductase_alpha_subunit_uncultured_archaeon	AFI62041.1	uncultured archaeon
AFI62043.1_methyl_coenzyme_M_reductase_alpha_subunit_uncultured_archaeon	AFI62043.1	uncultured archaeon
AFI62039.1_methyl_coenzyme_M_reductase_alpha_subunit_uncultured_archaeon	AFI62039.1	uncultured archaeon
AFI62037.1_methyl_coenzyme_M_reductase_alpha_subunit_partial_uncultured_archaeon	AFI62037.1	uncultured archaeon
AFI62033.1_methyl_coenzyme_M_reductase_alpha_subunit_partial_uncultured_archaeon	AFI62033.1	uncultured archaeon
WP_012035370.1_MethanocellaarvoryzaeMRE50	WP12035370.1	Methanocella arvoryzae
YP_003355571_MhcPalu4_organism=Methanocella_paludicola	YP3355571	Methanocella paludicola SANAE
YP_005380187_MhcConr4_organism=Methanocella_conradii	YP5380187	Methanocella conradii HZ254
WP_048177090.1_coenzyme-B_sulfoethylthiotransferase_subunit_alpha_Methanosarcina_sp._MTP4	WP48177090.1	Methanosarcina sp. MTP4
WP_048125107.1_coenzyme-B_sulfoethylthiotransferase_subunit_alpha_Methanosarcina	WP48125107.1	unclassified Methanosarcina
OEU44064.1_coenzyme-B_sulfoethylthiotransferase_subunit_alpha_Methanosarcina_sp._Ant1	OEU44064.1	Methanosarcina sp. Ant1
WP_048124207.1_coenzyme-B_sulfoethylthiotransferase_subunit_alpha_Methanosarcina_lacustris	WP48124207.1	Methanosarcina lacustris
WP_048172209.1_coenzyme-B_sulfoethylthiotransferase_subunit_alpha_Methanosarcina_sp._2.H.A.1B.4	WP48172209.1	Methanosarcina sp. 2.H.A.1B.4
WP_048131296.1_coenzyme-B_sulfoethylthiotransferase_subunit_alpha_Methanosarcina_sp._1.H.T.1A.1	WP48131296.1	Methanosarcina sp. 1.H.T.1A.1
WP_048141827.1_coenzyme-B_sulfoethylthiotransferase_subunit_alpha_Methanosarcina	WP48141827.1	unclassified Methanosarcina
WP_048123270.1_coenzyme-B_sulfoethylthiotransferase_subunit_alpha_Methanosarcina_vacuolata	WP48123270.1	Methanosarcina vacuolata
AKB49151.1_Methyl_coenzyme_M_reductase_alpha_subunit_Methanosarcina_sp._Kolksee	AKB49151.1	Methanosarcina sp. Kolksee
P07962_MhrBar13_organism=Methanosarcina_barkeri_strain_GB_Fusaro	P07962	Methanosarcina barkeri str. Fusaro
1E6Y_D_MhrBar15_organism=Methanosarcina_barkeri	1E6Y_D	Methanosarcina barkeri
WP_095645536.1_coenzyme-B_sulfoethylthiotransferase_subunit_alpha_Methanosarcina_spelaei	WP95645536.1	Methanosarcina spelaei
WP_048108547.1_coenzyme-B_sulfoethylthiotransferase_subunit_alpha_Methanosarcina_barkeri	WP48108547.1	Methanosarcina barkeri
AKJ39604.1_methyl-coenzyme_M_reductase_alpha_subunit_McrA_Methanosarcina_barkeri_CM1	AKJ39604.1	Methanosarcina barkeri CM1
WP_048136663.1_coenzyme-B_sulfoethylthiotransferase_subunit_alpha_Methanosarcina_horonobensis	WP48136663.1	Methanosarcina horonobensis
YP_007489939_MhrMaz23_organism=Methanosarcina_mazei	YP7489939	Methanosarcina mazei Tuc01
WP_048048304.1_coenzyme-B_sulfoethylthiotransferase_subunit_alpha_Methanosarcina_mazei	WP48048304.1	Methanosarcina mazei
WP_048050667.1_coenzyme-B_sulfoethylthiotransferase_subunit_alpha_Methanosarcina_soligelidi	WP48050667.1	Methanosarcina soligelidi
KKI05469.1_methyl-coenzyme_M_reductase_Methanosarcina_mazei	KKI05469.1	Methanosarcina mazei
WP_048037134.1_coenzyme-B_sulfoethylthiotransferase_subunit_alpha_Methanosarcina_mazei	WP48037134.1	Methanosarcina mazei
AAM30936_MhrMaz31_organism=Methanosarcina_mazei	AAM30936	Methanosarcina mazei Go1
AAM07885_MhrAcet8_organism=Methanosarcina_acetivorans	AAM07885	Methanosarcina acetivorans C2A
WP_048174272.1_coenzyme-B_sulfoethylthiotransferase_subunit_alpha_Methanosarcina_siciliae	WP48174272.1	Methanosarcina siciliae
WP_048044585.1_coenzyme-B_sulfoethylthiotransferase_subunit_alpha_Methanosarcina_mazei	WP48044585.1	Methanosarcina mazei
WP_054299716.1_coenzyme-B_sulfoethylthiotransferase_subunit_alpha_Methanosarcina_flavescens	WP54299716.1	Methanosarcina flavescens
WP_048167432.1_coenzyme-B_sulfoethylthiotransferase_subunit_alpha_Methanosarcina_thermophila	WP48167432.1	Methanosarcina thermophila
AKB15963.1_Methyl_coenzyme_M_reductase_alpha_subunit_Methanosarcina_thermophila_CHTI-55	AKB15963.1	Methanosarcina thermophila CHTI-55
ALK04706.1_methyl-coenzyme_M_reductase_Methanosarcina_sp._795	ALK04706.1	Methanosarcina sp. 795
APO18197.1_methyl_coenzyme-M_reductase_subunit_A_partial_uncultured_archaeon	APO18197.1	uncultured archaeon
APO18214.1_methyl_coenzyme-M_reductase_subunit_A_partial_uncultured_archaeon	APO18214.1	uncultured archaeon
WP_096712228.1_coenzyme-B_sulfoethylthiotransferase_subunit_alpha_Methanohalophilus_euhalobius	WP96712228.1	Methanohalophilus euhalobius
OBZ35131.1_coenzyme-B_sulfoethylthiotransferase_subunit_alpha_Methanohalophilus_sp._DAL1	OBZ35131.1	Methanohalophilus sp. DAL1
KXS46816.1_methyl-coenzyme_M_reductase_alpha_subunit_Methanohalophilus_sp._T328-1	KXS46816.1	Methanohalophilus sp. T328-1
YP_003541782_MepMahi5_organism=Methanohalophilus_mahii	YP3541782	Methanohalophilus mahii DSM 5219
WP_072359425.1_coenzyme-B_sulfoethylthiotransferase_subunit_alpha_Methanohalophilus_portucalensis	WP72359425.1	Methanohalophilus portucalensis
WP_072560206.1_coenzyme-B_sulfoethylthiotransferase_subunit_alpha_Methanohalophilus_halophilus	WP72560206.1	Methanohalophilus halophilus
YP_004615938_MsmZhil5_organism=Methanosalsum_zhilinae	YP4615938	Methanosalsum zhilinae DSM 4017
YP_006922405_MlbPsyc5_organism=Methanolobus_psychrophilus	YP6922405	Methanolobus psychrophilus R15
KXS44245.1_methyl-coenzyme_M_reductase_alpha_subunit_Methanolobus_sp._T82-4	KXS44245.1	Methanolobus sp. T82-4
WP_091708234.1_coenzyme-B_sulfoethylthiotransferase_subunit_alpha_Methanolobus_vulcani	WP91708234.1	Methanolobus vulcani
WP_023845930_MlbTinda_organism=Methanolobus_tindarius	WP23845930	Methanolobus tindarius
WP_091936029.1_coenzyme-B_sulfoethylthiotransferase_subunit_alpha_Methanolobus_profundi	WP91936029.1	Methanolobus profundi
WP_094228242.1_coenzyme-B_sulfoethylthiotransferase_subunit_alpha_Methanolobus_sp._YSF-03	WP94228242.1	Methanolobus psychrotolerans
YP_007313393_MhvHoll4_organism=Methanomethylovorans_hollandica	YP7313393	Methanomethylovorans hollandica DSM 15978
WP_091690538.1_coenzyme-B_sulfoethylthiotransferase_subunit_alpha_Methanococcoides_vulcani	WP91690538.1	Methanococcoides
ABE53268_Methanococcoides_burtonii_DSM_6242	ABE53268	Methanococcoides burtonii DSM 6242
WP_048204805.1_coenzyme-B_sulfoethylthiotransferase_subunit_alpha_Methanococcoides_methylutens	WP48204805.1	Methanococcoides methylutens
WP_048193230.1_coenzyme-B_sulfoethylthiotransferase_subunit_alpha_Methanococcoides_methylutens	WP48193230.1	Methanococcoides methylutens
YP_003726594_MbmEves4_organism=Methanohalobium_evestigatum	YP3726594	Methanohalobium evestigatum Z-7303
WP_084174107.1_coenzyme-B_sulfoethylthiotransferase_subunit_alpha_Methermicoccus_shengliensis	WP84174107.1	Methermicoccus shengliensis
KUK04994.1_Methyl-coenzyme_M_reductase_subunit_alpha_Euryarchaeota_archaeon_55_53	KUK04994.1	Euryarchaeota archaeon 55_53
RZN68357.1_coenzyme-B_sulfoethylthiotransferase_subunit_alpha_Euryarchaeota_archaeon_NM1b	RZN68357.1	Candidatus Methanolliviera hydrocarbonicum
MCR_A_D-C06_oil_16th_re_NODE_2	VUT23562.1	Candidatus Methanolliviera sp. GoM_oil
RZN65461.1_coenzyme-B_sulfoethylthiotransferase_subunit_alpha_Euryarchaeota_archaeon_NM1a	RZN65461.1	Candidatus Methanoliparum thermophilum
MCR_A_D-C06_asphalt12_7re_NODE_9	VUT23916.1	Candidatus Methanolliviera sp. GoM_asphalt
AUD55425.1_methyl-coenzyme_M_reductase_alpha_subunit_partial_uncultured_euryarchaeote	AUD55425.1	uncultured euryarchaeote
PKL53585.1_coenzyme-B_sulfoethylthiotransferase_subunit_alpha_Candidatus_Methanoperedenaceae_HGW-1	PKL53585.1	Candidatus Methanoperedenaceae archaeon HGW-Methanoperedenaceae-1
SNQ61551.1_Methyl-coenzyme_M_reductase_subunit_alpha_Candidatus_Methanoperedens_nitroreducens	SNQ61551.1	Candidatus Methanoperedens nitroreducens
KCZ72673.1_methyl-coenzyme_M_reductase_alpha_subunit_Candidatus_Methanoperedens_nitroreducens	KCZ72673.1	Candidatus Methanoperedens nitroreducens
KPQ44219.1_methyl_coenzyme_M_reductase_subunit_mcrA_Candidatus_Methanoperedens_sp._BLZ1	KPQ44219.1	Candidatus Methanoperedens sp. BLZ1
KYC53403.1_Methyl_coenzyme_M_reductase_alpha_subunit_Arc_I_group_archaeon_U1lsi0528_Bin055	KYC53403.1	Candidatus Methanofastidiosum methylthiophilus
KYC55281.1_Methyl-coenzyme_M_reductase_I_subunit_alpha_Arc_I_group_archaeon_ADurb1013_Bin02101	KYC55281.1	Candidatus Methanofastidiosum methylthiophilus
KYC49031.1_Methyl-coenzyme_M_reductase_I_subunit_alpha_Arc_I_group_archaeon_BMIXfssc0709_Meth_Bin006	KYC49031.1	Candidatus Methanofastidiosum methylthiophilus
KYC51830.1_Methyl-coenzyme_M_reductase_I_subunit_alpha_Arc_I_group_archaeon_U1lsi0528_Bin089	KYC51830.1	Candidatus Methanofastidiosum methylthiophilus
WP_019176774_MhaLumi3_organism=Methanomassiliicoccus_luminyensis	WP19176774	Methanomassiliicoccus luminyensis
YP_008072226_CanMeth3_organism=Candidatus_Methanomassiliicoccus	YP8072226	Candidatus Methanomassiliicoccus intestinalis Issoire-Mx1
WP_048134048.1_coenzyme-B_sulfoethylthiotransferase_subunit_alpha_Candidatus_Methanomassiliicoccus_intestinalis	WP48134048.1	Candidatus Methanomassiliicoccus intestinalis
AHY86393.1_methyl_coenzyme-M_reductase_methanogenic_archaeon_ISO4-H5	AHY86393.1	methanogenic archaeon ISO4-H5
WP_015491991.1_coenzyme-B_sulfoethylthiotransferase_subunit_alpha_Thermoplasmatales_archaeon_BRNA1	WP15491991.1	Thermoplasmatales archaeon BRNA1
YP_007713068_CanMeth2_organism=Candidatus_Methanomethylophilus	YP7713068	Candidatus Methanomethylophilus alvus Mx1201
KUE73676.1_methyl-coenzyme_M_reductase_subunit_alpha_Candidatus_Methanomethylophilus_sp._1R26	KUE73676.1	Candidatus Methanomethylophilus sp. 1R26
WP_082662427.1_coenzyme-B_sulfoethylthiotransferase_subunit_alpha_Candidatus_Methanomethylophilus_sp._1R26	WP82662427.1	Candidatus Methanomethylophilus sp. 1R26
KQM10793.1_methyl-coenzyme_M_reductase_Methanomassiliicoccales_archaeon_RumEn_M2	KQM10793.1	Methanomassiliicoccales archaeon RumEn M2
WP_048111444.1_coenzyme-B_sulfoethylthiotransferase_subunit_alpha_Candidatus_Methanoplasma_termitum	WP48111444.1	Candidatus Methanoplasma termitum
AMK13668.1_methyl-coenzyme_M_reductase_alpha_subunit_McrA_methanogenic_archaeon_mixed_culture_ISO4-G1	AMK13668.1	methanogenic archaeon mixed culture ISO4-G1
RZN47592.1_coenzyme-B_sulfoethylthiotransferase_subunit_alpha_archaeon	RZN47592.1	archaeon
OKY78426.1_Methyl_coenzyme_M_reductase_alpha_subunit_McrA_Candidatus_Methanohalarchaeum_thermophilum	OKY78426.1	Candidatus Methanohalarchaeum thermophilum
WP_086637809.1_coenzyme-B_sulfoethylthiotransferase_subunit_alpha_Methanonatronarchaeum_thermophilum	WP86637809.1	Methanonatronarchaeum thermophilum
RZN61136.1_coenzyme-B_sulfoethylthiotransferase_subunit_alpha_Methanonatronarchaeia_archaeon	RZN61136.1	Methanonatronarchaeia archaeon
WP_086637808.1_coenzyme-B_sulfoethylthiotransferase_subunit_alpha_Methanonatronarchaeum_thermophilum	WP86637808.1	Methanonatronarchaeum thermophilum
ALG76131.1_methyl-coenzyme_M_reductase_subunit_alpha_uncultured_archaeon	ALG76131.1	uncultured archaeon
OYT67293.1_methyl-coenzyme_M_reductase_subunit_alpha_ANME-1_cluster_archaeon_ex4572_4	OYT67293.1	ANME-1 cluster archaeon ex4572_4
AAU82711_IMCRive2_organism=Eel_River_sediment_fosmid_clone_GZfos19C7_clone_GB_GZfos19C7	AAU82711	uncultured archaeon GZfos19C7
AAU84252_Unc03d9d_organism=uncultured_archaeon_clone_GB_GZfos9C4	AAU84252	uncultured archaeon GZfos9C4
AUD55420.1_methyl-coenzyme_M_reductase_alpha_subunit_partial_uncultured_euryarchaeote	AUD55420.1	uncultured euryarchaeote
CBH39484_BakSea13_organism=Black_Sea_microbial_mat_clone	CBH39484	uncultured archaeon
3SQGA_Chain_A_Crystal_structure_methyl-coenzyme_M_reductase_from_Black_Sea_mats	3SQG_A
CAE46369_BakSea00_organism=Black_Sea_microbial_mat_clone_0418F12_clone_GB_0418F12	CAE46369	uncultured archaeon
AAU82960_Unc03d9h_organism=uncultured_archaeon_clone_GB_GZfos24D9	AAU82960	uncultured archaeon GZfos24D9
AAU83544_Unc03d0t_organism=GZfos30H9_clone_GB_GZfos30H9	AAU83544	uncultured archaeon GZfos30H9
AAU83782_Unc03d9f_organism=uncultured_archaeon_clone_GB_GZfos33H6	AAU83782	uncultured archaeon GZfos33H6
AAQ63476_Unc03d71_organism=uncultured_archaeon	AAQ63476	uncultured archaeon
AAU82276_Unc03d9j_organism=uncultured_archaeon_clone_GB_GZfos13E1	AAU82276	uncultured archaeon GZfos13E1
GoM-ArcI-fra-mcrA_Lokis_castle	RZN16117.1	Methanosarcinales archaeon
AG-392-D22_GoM-Arc-I_concatenated	RZB32666.1	Candidatus Argoarchaeum ethanivorans
AG-392-J18_Gom-Arc-I	RLG26955.1	Methanosarcinales archaeon
RZN16117.1_coenzyme-B_sulfoethylthiotransferase_subunit_alpha_Methanosarcinales_archaeon	RZN16117.1	Methanosarcinales archaeon
RZB32666.1_methyl-coenzyme_M_reductase_alpha_subunit_Methanosarcinales_archaeon	RZB32666.1	Candidatus Argoarchaeum ethanivorans
RLG26955.1_methyl-coenzyme_M_reductase_subunit_alpha_Methanosarcinales_archaeon	RLG26955.1	Methanosarcinales archaeon
GoM-ArcI-bin-j13_ethane_50	CAD7773534.1	Candidatus Methanoperedenaceae archaeon GB50
OYT62528.1_hypothetical_protein_B6U67_04395_Methanosarcinales_archaeon_ex4484_138	OYT62528.1	Methanosarcinales archaeon ex4484_138
RLG26650.1_methyl-coenzyme_M_reductase_subunit_alpha_Methanosarcinales_archaeon	RLG26650.1	Methanosarcinales archaeon
PHP46140.1_methyl-coenzyme_M_reductase_subunit_alpha_Methanosarcinales_archaeon_ex4572_44	PHP46140.1	Methanosarcinales archaeon ex4572_44
SUPR01000026.1_31Hel_GB_B_McrA	SUPR01000026.1	Candidatus Helarchaeota ASGARD archaeon Hel_GB_B
