# Supplementary material for: Candidatus Alkanophaga archaea from heated hydrothermal vent sediment oxidize petroleum alkanes
Source: Research Square preprint supplement (doi:10.21203/rs.3.rs-2096998/v1), 2022-10-04
Supplement: Supplementary file 6 [file a9645e353b2f56021b20fe14.xlsx]

## Sheet: MAG 4 (A. volatiphilum)
Organism A	Genes in A	Organism B	Genes in B	Mean AAI	# orthologous genes	Std AAI	Orthologous fraction (OF)		Alkanophaga
MAG4_Alkanophaga_volatiphilum	1773	MAG1_Alkanophaga_liqudiphilum	2011	84.38	1221	8.31	68.87		ANME-1
MAG4_Alkanophaga_volatiphilum	1773	ANME-1_10	347	59.43	165	10.32	47.55		Syntrophoarchaeum
MAG4_Alkanophaga_volatiphilum	1773	ANME_sp._SA	2466	58.7	655	10.88	36.94
MAG4_Alkanophaga_volatiphilum	1773	ANME_PB_MANV_002	1197	58.52	553	11	46.2
MAG4_Alkanophaga_volatiphilum	1773	Methanophagales_archaeon_5	1974	58.1	480	11.06	27.07
MAG4_Alkanophaga_volatiphilum	1773	Methanophagales_archaeon_4	2388	58.03	485	11.22	27.35
MAG4_Alkanophaga_volatiphilum	1773	ANME1_50	1455	58	685	12.04	47.08
Methanophagales_archaeon_2	1824	MAG4_Alkanophaga_volatiphilum	1773	57.89	695	10.79	39.2
MAG4_Alkanophaga_volatiphilum	1773	ANME_sp._SCGC_AAA252-L18	2836	57.76	517	10.91	29.16
MAG4_Alkanophaga_volatiphilum	1773	ANME1_15_1	2008	57.71	723	10.87	40.78
MAG4_Alkanophaga_volatiphilum	1773	ANME_PB_MBMC_171	2029	57.62	594	10.26	33.5
ANME-1b_9	1099	MAG4_Alkanophaga_volatiphilum	1773	57.59	494	10.36	44.95
MAG4_Alkanophaga_volatiphilum	1773	ANME_sp._GoMg1	2498	57.49	594	10.48	33.5
ANME_1_cluster_archaeon_GoMg1	2500	MAG4_Alkanophaga_volatiphilum	1773	57.49	596	10.46	33.62
MAG4_Alkanophaga_volatiphilum	1773	ANME_sp._GoMg2	2357	57.4	548	10.6	30.91
ANME_1_cluster_archaeon_GoMg2	2359	MAG4_Alkanophaga_volatiphilum	1773	57.39	550	10.59	31.02
MAG4_Alkanophaga_volatiphilum	1773	ANME-1a_1	1682	57.26	626	10.25	37.22
MAG4_Alkanophaga_volatiphilum	1773	ANME-1b_13	1616	57.21	637	10.34	39.42
Methanophagales_archaeon_7	2429	MAG4_Alkanophaga_volatiphilum	1773	57.2	604	10.72	34.07
MAG4_Alkanophaga_volatiphilum	1773	ANME_sp._ERB6	5000	57.16	561	10.61	31.64
MAG4_Alkanophaga_volatiphilum	1773	ANME_1_cluster_archaeon_AG_394_G21	1920	57.15	539	10.63	30.4
MAG4_Alkanophaga_volatiphilum	1773	Methanophagales_archaeon_6	1451	57.09	482	11	33.22
MAG4_Alkanophaga_volatiphilum	1773	ANME_sp._CONS3730MDAH03UFb1	3311	56.99	618	10.56	34.86
MAG4_Alkanophaga_volatiphilum	1773	Methanophagales_archaeon_11	3303	56.95	617	10.53	34.8
MAG4_Alkanophaga_volatiphilum	1773	Methanophagales_archaeon_10	2947	56.94	554	10.55	31.25
ANME_sp._CONS3730F07p2b1	2946	MAG4_Alkanophaga_volatiphilum	1773	56.93	555	10.54	31.3
MAG4_Alkanophaga_volatiphilum	1773	ANME_sp._GoMg3.2	2929	56.84	535	10.9	30.17
Methanophagales_archaeon_ANME_1_THS	2217	MAG4_Alkanophaga_volatiphilum	1773	56.76	625	10.79	35.25
MAG4_Alkanophaga_volatiphilum	1773	ANME1_15_2	2031	56.73	746	11.71	42.08
MAG4_Alkanophaga_volatiphilum	1773	ANME-1b_20	1900	56.69	600	10.47	33.84
MAG4_Alkanophaga_volatiphilum	1773	ANME_sp._ERB7	6156	56.54	541	11.09	30.51
MAG4_Alkanophaga_volatiphilum	1773	Methanophagales_archaeon_3	3337	56.52	700	10.34	39.48
MAG4_Alkanophaga_volatiphilum	1773	ANME_sp._CONS3730H04p2b1	2828	56.43	547	10.89	30.85
MAG4_Alkanophaga_volatiphilum	1773	Methanophagales_archaeon_9	2832	56.39	546	10.86	30.8
MAG4_Alkanophaga_volatiphilum	1773	ANME_1_cluster_archaeon_ex4572_4	1049	56.12	465	10.68	44.33
MAG4_Alkanophaga_volatiphilum	1773	Methanophagales_archaeon_8	2059	56.12	435	10.65	24.53
MAG4_Alkanophaga_volatiphilum	1773	ANME_sp._Agg-C03	2060	56.12	435	10.65	24.53
MAG4_Alkanophaga_volatiphilum	1773	Methanophagales_archaeon	1385	56.01	630	10.03	45.49
MAG4_Alkanophaga_volatiphilum	1773	ANME1_12mod	1575	55.79	625	10.17	39.68
MAG4_Alkanophaga_volatiphilum	1773	Candidatus_Syntrophoarchaeum_sp_WYZ_LMO15	1459	55.1	687	10.91	47.09
MAG4_Alkanophaga_volatiphilum	1773	Candidatus_Syntrophoarchaeum_butanivorans	1560	54.97	675	11.16	43.27
Candidatus_Syntrophoarchaeum_butanivorans_3	1659	MAG4_Alkanophaga_volatiphilum	1773	54.91	712	11.19	42.92
MAG4_Alkanophaga_volatiphilum	1773	Candidatus_Syntrophoarchaeum_caldarius	1753	53.93	690	10.23	39.36
Candidatus_Syntrophoarchaeum_Pesca	1808	MAG4_Alkanophaga_volatiphilum	1773	53.85	697	10.11	39.31
MAG4_Alkanophaga_volatiphilum	1773	Candidatus_Syntrophoarchaeum_sp_GoM_oil	866	52.86	269	9.74	31.06

## Sheet: MAG 1 (A. liquidiphilum)
Organism A	Genes in A	Organism B	Genes in B	Mean AAI	# orthologous genes	Std AAI	Orthologous fraction (OF)		Alkanophaga
MAG4_Alkanophaga_volatiphilum	1773	MAG1_Alkanophaga_liqudiphilum	2011	84.38	1221	8.31	68.87		ANME-1
ANME-1_10	347	MAG1_Alkanophaga_liqudiphilum	2011	58.53	173	10.37	49.86		Syntrophoarchaeum
ANME_sp._SA	2466	MAG1_Alkanophaga_liqudiphilum	2011	58.11	710	10.5	35.31
ANME_PB_MANV_002	1197	MAG1_Alkanophaga_liqudiphilum	2011	57.74	600	10.82	50.13
Methanophagales_archaeon_5	1974	MAG1_Alkanophaga_liqudiphilum	2011	57.56	506	10.95	25.63
Methanophagales_archaeon_4	2388	MAG1_Alkanophaga_liqudiphilum	2011	57.52	535	11.12	26.6
MAG1_Alkanophaga_liqudiphilum	2011	ANME1_50	1455	57.48	762	11.71	52.37
Methanophagales_archaeon_2	1824	MAG1_Alkanophaga_liqudiphilum	2011	57.29	773	10.98	42.38
ANME-1b_9	1099	MAG1_Alkanophaga_liqudiphilum	2011	57.08	527	10.27	47.95
ANME_sp._ERB6	5000	MAG1_Alkanophaga_liqudiphilum	2011	56.98	855	10.83	42.52
MAG1_Alkanophaga_liqudiphilum	2011	ANME1_15_1	2008	56.96	779	10.9	38.79
ANME_sp._SCGC_AAA252-L18	2836	MAG1_Alkanophaga_liqudiphilum	2011	56.93	578	10.94	28.74
Methanophagales_archaeon_7	2429	MAG1_Alkanophaga_liqudiphilum	2011	56.93	641	10.63	31.87
ANME-1b_13	1616	MAG1_Alkanophaga_liqudiphilum	2011	56.83	692	10.26	42.82
ANME_1_cluster_archaeon_GoMg2	2359	MAG1_Alkanophaga_liqudiphilum	2011	56.78	617	10.65	30.68
MAG1_Alkanophaga_liqudiphilum	2011	Methanophagales_archaeon_6	1451	56.78	526	10.61	36.25
MAG1_Alkanophaga_liqudiphilum	2011	ANME_sp._GoMg2	2357	56.76	616	10.64	30.63
MAG1_Alkanophaga_liqudiphilum	2011	ANME_PB_MBMC_171	2029	56.74	640	10.16	31.82
MAG1_Alkanophaga_liqudiphilum	2011	ANME_1_cluster_archaeon_AG_394_G21	1920	56.68	579	10.65	30.16
ANME-1a_1	1682	MAG1_Alkanophaga_liqudiphilum	2011	56.6	666	10.15	39.6
ANME_1_cluster_archaeon_GoMg1	2500	MAG1_Alkanophaga_liqudiphilum	2011	56.58	662	10.77	32.92
ANME_sp._GoMg1	2498	MAG1_Alkanophaga_liqudiphilum	2011	56.58	662	10.77	32.92
MAG1_Alkanophaga_liqudiphilum	2011	ANME_sp._CONS3730MDAH03UFb1	3311	56.46	680	10.32	33.81
MAG1_Alkanophaga_liqudiphilum	2011	Methanophagales_archaeon_3	3337	56.43	762	10.22	37.89
MAG1_Alkanophaga_liqudiphilum	2011	Methanophagales_archaeon_11	3303	56.43	679	10.31	33.76
Methanophagales_archaeon_ANME_1_THS	2217	MAG1_Alkanophaga_liqudiphilum	2011	56.42	712	10.57	35.41
ANME-1b_20	1900	MAG1_Alkanophaga_liqudiphilum	2011	56.38	638	10.33	33.58
ANME1_15_2	2031	MAG1_Alkanophaga_liqudiphilum	2011	56.36	824	11.66	40.97
ANME_sp._GoMg3.2	2929	MAG1_Alkanophaga_liqudiphilum	2011	56.34	571	10.88	28.39
MAG1_Alkanophaga_liqudiphilum	2011	Methanophagales_archaeon_10	2947	56.19	624	10.64	31.03
MAG1_Alkanophaga_liqudiphilum	2011	ANME_sp._ERB7	6156	56.18	581	11.04	28.89
ANME_sp._CONS3730F07p2b1	2946	MAG1_Alkanophaga_liqudiphilum	2011	56.17	626	10.63	31.13
ANME_sp._CONS3730H04p2b1	2828	MAG1_Alkanophaga_liqudiphilum	2011	55.96	587	10.57	29.19
Methanophagales_archaeon_9	2832	MAG1_Alkanophaga_liqudiphilum	2011	55.93	586	10.55	29.14
MAG1_Alkanophaga_liqudiphilum	2011	Methanophagales_archaeon_8	2059	55.81	469	10.31	23.32
MAG1_Alkanophaga_liqudiphilum	2011	ANME_sp._Agg-C03	2060	55.81	469	10.31	23.32
MAG1_Alkanophaga_liqudiphilum	2011	ANME_1_cluster_archaeon_ex4572_4	1049	55.61	505	10.73	48.14
MAG1_Alkanophaga_liqudiphilum	2011	Methanophagales_archaeon	1385	55.3	690	10.16	49.82
MAG1_Alkanophaga_liqudiphilum	2011	ANME1_12mod	1575	55.27	680	10.13	43.17
Candidatus_Syntrophoarchaeum_butanivorans	1560	MAG1_Alkanophaga_liqudiphilum	2011	54.47	768	10.91	49.23
Candidatus_Syntrophoarchaeum_butanivorans_3	1659	MAG1_Alkanophaga_liqudiphilum	2011	54.38	787	10.97	47.44
MAG1_Alkanophaga_liqudiphilum	2011	Candidatus_Syntrophoarchaeum_sp_WYZ_LMO15	1459	54.34	768	10.63	52.64
MAG1_Alkanophaga_liqudiphilum	2011	Candidatus_Syntrophoarchaeum_caldarius	1753	53.42	771	10.4	43.98
Candidatus_Syntrophoarchaeum_Pesca	1808	MAG1_Alkanophaga_liqudiphilum	2011	53.19	766	10.13	42.37
MAG1_Alkanophaga_liqudiphilum	2011	Candidatus_Syntrophoarchaeum_sp_GoM_oil	866	52.18	317	9.83	36.61
