# Supplementary material for: Candidatus Alkanophaga archaea from heated hydrothermal vent sediment oxidize petroleum alkanes
Source: Research Square preprint supplement (doi:10.21203/rs.3.rs-2096998/v1), 2022-10-04
Supplement: Supplementary file 7 [file b6dfb3424aa96d55fe669df6.xlsx]

## Sheet: MAG 4 (A. volatiphilum)
Alkane oxidation and electron transfer								Raw fragments								Fragments per kilobase (FPK)								Centered log ratio (CLR)
gene_callers_id	pathway_part	protein	protein_abbreviation	specific_gene	COG20_function	KOfam_function	Pfam_function	pentane	hexane	heptane	octane	nonane	decane	dodecane	tetradecane	pentane	hexane	heptane	octane	nonane	decane	dodecane	tetradecane	pentane	hexane	heptane	octane	nonane	decane	dodecane	tetradecane
156	Alkane activation	Alkyl-coenzyme M reductase	acr	acrG	Methyl coenzyme M reductase, gamma subunit (McorG) (PDB:5N1Q)	methyl-coenzyme M reductase gamma subunit [EC:2.8.4.1]	Methyl-coenzyme M reductase gamma subunit	1242	1173	1229	0	0	0	0	0	1389.26	1312.08	1374.72	0	0	0	0	0	1.12607	0.534634	0.722669	-0.243895	-0.232163	-0.218394	-0.227532	-0.210933
157	Alkane activation	Alkyl-coenzyme M reductase	acr	acrB	Methyl coenzyme M reductase, beta subunit (McorB) (PDB:5N28)	methyl-coenzyme M reductase beta subunit [EC:2.8.4.1]	Methyl-coenzyme M reductase beta subunit, C-terminal domain	2375	1401	1863	0	0	0	0	0	1721.01	1015.22	1350	0	0	0	0	0	1.21899	0.423203	0.714728	-0.432437	-0.420705	-0.406936	-0.416074	-0.399475
174	Alkane activation	Alkyl-coenzyme M reductase	acr	acrA	Methyl coenzyme M reductase, alpha subunit (McorA) (PDB:1E6V)	methyl-coenzyme M reductase alpha subunit [EC:2.8.4.1]	Methyl-coenzyme M reductase alpha subunit, C-terminal domain	905	1274	1255	1	0	0	0	0	540.621	761.051	749.701	0.597372	0	0	0	0	0.716242	0.298073	0.459339	-0.0391922	-0.504581	-0.490812	-0.49995	-0.483351
175	Alkane activation	Alkyl-coenzyme M reductase	acr	acrG	Methyl coenzyme M reductase, gamma subunit (McorG) (PDB:5N1Q)	methyl-coenzyme M reductase gamma subunit [EC:2.8.4.1]	Methyl-coenzyme M reductase gamma subunit	284	333	361	0	0	0	0	0	366.925	430.233	466.408	0	0	0	0	0	0.548451	0.0508435	0.253645	-0.181299	-0.169567	-0.155798	-0.164936	-0.148337
176	Alkane activation	Alkyl-coenzyme M reductase	acr	acrB	Methyl coenzyme M reductase, beta subunit (McorB) (PDB:5N28)	methyl-coenzyme M reductase beta subunit [EC:2.8.4.1]	Methyl-coenzyme M reductase beta subunit, C-terminal domain	302	499	560	1	0	0	0	0	221.733	366.373	411.16	0.734214	0	0	0	0	0.329657	-0.019153	0.198677	0.0503862	-0.415003	-0.401234	-0.410372	-0.393773
379	Alkane activation	Alkyl-coenzyme M reductase	acr	acrC	Methyl coenzyme M reductase, subunit C (McorC)	methyl-coenzyme M reductase subunit C		174	216	178	0	0	0	0	0	274.882	341.232	281.201	0	0	0	0	0	0.423501	-0.0494571	0.0345127	-0.0939617	-0.0822293	-0.0684605	-0.0775985	-0.0609995
514	Alkane activation	Alkyl-coenzyme M reductase	acr	acrA	Methyl coenzyme M reductase, alpha subunit (McorA) (PDB:1E6V)		Methyl-coenzyme M reductase alpha subunit, C-terminal domain	10400	5253	6525	2	1	0	0	0	5450.73	2753.14	3419.81	1.04822	0.524109	0	0	0	1.71959	0.856359	1.11831	0.125834	-0.0842827	-0.547635	-0.556773	-0.540174
783	Alkane activation	Alkyl-coenzyme M reductase	acr	acrD	Methyl coenzyme M reductase, subunit D (McorD)		Methyl-coenzyme M reductase operon protein D	113	211	182	0	0	0	0	0	289.744	541.026	466.667	0	0	0	0	0	0.44704	0.150734	0.254476	0.116377	0.12811	0.141879	0.132741	0.14934
813	Alkane activation	Alkyl-coenzyme M reductase	acr	acrG	Methyl coenzyme M reductase, gamma subunit (McorG) (PDB:5N1Q)	methyl-coenzyme M reductase gamma subunit [EC:2.8.4.1]	Methyl-coenzyme M reductase gamma subunit	423	376	250	0	0	0	0	0	536.122	476.553	316.857	0	0	0	0	0	0.712886	0.0951766	0.0860089	-0.189635	-0.177903	-0.164134	-0.173272	-0.156673
814	Alkane activation	Alkyl-coenzyme M reductase	acr	acrA	Methyl coenzyme M reductase, alpha subunit (McorA) (PDB:1E6V)	methyl-coenzyme M reductase alpha subunit [EC:2.8.4.1]	Methyl-coenzyme M reductase alpha subunit, C-terminal domain	1218	605	477	0	0	0	0	0	731.532	363.363	286.486	0	0	0	0	0	0.847521	-0.0228114	0.0418373	-0.513972	-0.50224	-0.488471	-0.497609	-0.48101
815	Alkane activation	Alkyl-coenzyme M reductase	acr	acrB	Methyl coenzyme M reductase, beta subunit (McorB) (PDB:5N28)	methyl-coenzyme M reductase beta subunit [EC:2.8.4.1]	Methyl-coenzyme M reductase beta subunit, C-terminal domain	824	445	351	0	0	0	0	0	620.015	334.838	264.108	0	0	0	0	0	0.775775	-0.0581886	0.00667849	-0.416083	-0.404351	-0.390582	-0.39972	-0.383121
1881	Alkane activation	Alkyl-coenzyme M reductase	acr	acrA	Methyl coenzyme M reductase, alpha subunit (McorA) (PDB:1E6V)			0	36	38	3	3	0	0	0	0	255.319	269.504	21.2766	21.2766	0	0	0	-1.46714	-0.170438	0.0205198	1.40332	1.41505	0.583724	0.574586	0.591185
29	Beta-oxidation	Acyl-CoA dehydrogenase	acad	caiA	Acyl-CoA dehydrogenase related to the alkylation response protein AidB (CaiA) (PDB:1BUC)	acyl-CoA dehydrogenase [EC:1.3.8.7]	Acyl-CoA dehydrogenase, C-terminal domain	412	523	340	0	0	0	1	0	358.573	455.178	295.909	0	0	0	0.870322	0	0.538213	0.0750853	0.0560752	-0.352878	-0.341146	-0.327377	0.140606	-0.319916
133	Beta-oxidation	Acyl-CoA dehydrogenase	acad	caiA	Acyl-CoA dehydrogenase related to the alkylation response protein AidB (CaiA) (PDB:1BUC)	acyl-CoA dehydrogenase [EC:1.3.8.7]	Acyl-CoA dehydrogenase, C-terminal domain	190	433	351	0	0	0	0	0	167.106	380.827	308.707	0	0	0	0	0	0.207244	-0.0022827	0.074443	-0.348318	-0.336586	-0.322817	-0.331955	-0.315356
409	Beta-oxidation	Acyl-CoA dehydrogenase	acad	caiA	Acyl-CoA dehydrogenase related to the alkylation response protein AidB (CaiA) (PDB:1BUC)		Acyl-CoA dehydrogenase, N-terminal domain	37	45	42	0	0	0	0	0	173.709	211.268	197.183	0	0	0	0	0	0.228761	-0.25388	-0.115713	0.379062	0.390795	0.404564	0.395426	0.412025
410	Beta-oxidation	Acyl-CoA dehydrogenase	acad	caiA	Acyl-CoA dehydrogenase related to the alkylation response protein AidB (CaiA) (PDB:1BUC)		Acyl-CoA dehydrogenase, middle domain	41	100	63	0	0	0	0	0	128.931	314.465	198.113	0	0	0	0	0	0.0987302	-0.0837724	-0.115375	0.205015	0.216747	0.230516	0.221378	0.237977
411	Beta-oxidation	Acyl-CoA dehydrogenase	acad	caiA	Acyl-CoA dehydrogenase related to the alkylation response protein AidB (CaiA) (PDB:1BUC)		Acyl-CoA dehydrogenase, C-terminal domain	48	163	91	0	0	0	0	0	125.984	427.822	238.845	0	0	0	0	0	0.087926	0.0490814	-0.0352257	0.126517	0.138249	0.152018	0.14288	0.159479
556	Beta-oxidation	Acyl-CoA dehydrogenase	acad	caiA	Acyl-CoA dehydrogenase related to the alkylation response protein AidB (CaiA) (PDB:1BUC)	acyl-CoA dehydrogenase [EC:1.3.8.7]	Acyl-CoA dehydrogenase, C-terminal domain	192	378	319	0	0	0	0	0	171.123	336.898	284.314	0	0	0	0	0	0.217547	-0.0554383	0.0387561	-0.342551	-0.330818	-0.31705	-0.326188	-0.309589
677	Beta-oxidation	Acyl-CoA dehydrogenase	acad	caiA	Acyl-CoA dehydrogenase related to the alkylation response protein AidB (CaiA) (PDB:1BUC)	acyl-CoA dehydrogenase [EC:1.3.8.7]	Acyl-CoA dehydrogenase, C-terminal domain	226	557	451	0	0	0	0	0	145.712	359.123	290.78	0	0	0	0	0	0.147566	-0.0278783	0.0483241	-0.48317	-0.471437	-0.457669	-0.466807	-0.450208
886	Beta-oxidation	Acyl-CoA dehydrogenase	acad	caiA	Acyl-CoA dehydrogenase related to the alkylation response protein AidB (CaiA) (PDB:1BUC)	acyl-CoA dehydrogenase [EC:1.3.8.7]	Acyl-CoA dehydrogenase, C-terminal domain	328	902	1102	0	0	0	0	0	290.009	797.524	974.359	0	0	0	0	0	0.446182	0.318473	0.573194	-0.346021	-0.334288	-0.320519	-0.329657	-0.313058
947	Beta-oxidation	Acyl-CoA dehydrogenase	acad	caiA	Acyl-CoA dehydrogenase related to the alkylation response protein AidB (CaiA) (PDB:1BUC)		Acyl-CoA dehydrogenase, C-terminal domain	43	84	78	0	0	0	0	0	150.877	294.737	273.684	0	0	0	0	0	0.166754	-0.111499	0.0243029	0.252597	0.26433	0.278098	0.26896	0.285559
1173	Beta-oxidation	Acyl-CoA dehydrogenase	acad	caiA	Acyl-CoA dehydrogenase related to the alkylation response protein AidB (CaiA) (PDB:1BUC)	acyl-CoA dehydrogenase [EC:1.3.8.7]	Acyl-CoA dehydrogenase, C-terminal domain	614	1385	1271	0	0	0	0	0	396.641	894.703	821.059	0	0	0	0	0	0.58186	0.368324	0.498824	-0.482329	-0.470597	-0.456828	-0.465966	-0.449367
1488	Beta-oxidation	Acyl-CoA dehydrogenase	acad	caiA	Acyl-CoA dehydrogenase related to the alkylation response protein AidB (CaiA) (PDB:1BUC)	acyl-CoA dehydrogenase [EC:1.3.8.7]	Acyl-CoA dehydrogenase, C-terminal domain	187	346	303	0	0	0	0	0	162.326	300.347	263.021	0	0	0	0	0	0.194658	-0.105261	0.00498436	-0.35401	-0.342278	-0.328509	-0.337647	-0.321048
42	Beta-oxidation	Enoyl-CoA hydratase	ech	caiD	Enoyl-CoA hydratase/carnithine racemase (CaiD) (PDB:1DCI)!!!3-hydroxyacyl-CoA dehydrogenase (FadB) (PDB:5ZQZ)	enoyl-CoA hydratase / 3-hydroxyacyl-CoA dehydrogenase [EC:4.2.1.17 1.1.1.35]	3-hydroxyacyl-CoA dehydrogenase, C-terminal domain	626	1151	1211	0	0	0	0	0	513.957	944.992	994.253	0	0	0	0	0	0.694383	0.392105	0.581954	-0.378205	-0.366473	-0.352704	-0.361842	-0.345243
180	Beta-oxidation	Enoyl-CoA hydratase	ech				Enoyl-CoA hydratase/isomerase	2	35	31	0	0	0	0	0	6.00601	105.105	93.0931	0	0	0	0	0	-1.1414	-0.555727	-0.439856	0.184998	0.19673	0.210499	0.201361	0.21796
335	Beta-oxidation	Enoyl-CoA hydratase	ech	caiD	Enoyl-CoA hydratase/carnithine racemase (CaiD) (PDB:1DCI)	enoyl-CoA hydratase [EC:4.2.1.17]	Enoyl-CoA hydratase/isomerase	259	1727	1095	0	0	0	0	0	327.02	2180.56	1382.58	0	0	0	0	0	0.498521	0.755182	0.725165	-0.191283	-0.179551	-0.165782	-0.17492	-0.158321
491	Beta-oxidation	Enoyl-CoA hydratase	ech	caiD	Enoyl-CoA hydratase/carnithine racemase (CaiD) (PDB:1DCI)	enoyl-CoA hydratase [EC:4.2.1.17]	Enoyl-CoA hydratase/isomerase	134	220	149	0	0	0	0	0	169.835	278.834	188.847	0	0	0	0	0	0.214754	-0.13718	-0.138158	-0.189635	-0.177903	-0.164134	-0.173272	-0.156673
976	Beta-oxidation	Enoyl-CoA hydratase	ech	caiD	Enoyl-CoA hydratase/carnithine racemase (CaiD) (PDB:1DCI)	enoyl-CoA hydratase [EC:4.2.1.17]	Enoyl-CoA hydratase/isomerase	18	84	50	0	0	0	0	0	40.2685	187.919	111.857	0	0	0	0	0	-0.400027	-0.306962	-0.362738	0.0571345	0.0688669	0.0826357	0.0734977	0.0900967
977	Beta-oxidation	Enoyl-CoA hydratase	ech	caiD	Enoyl-CoA hydratase/carnithine racemase (CaiD) (PDB:1DCI)		Enoyl-CoA hydratase/isomerase	41	24	17	0	0	0	0	0	133.987	78.4314	55.5556	0	0	0	0	0	0.115436	-0.680067	-0.658405	0.221721	0.233453	0.247222	0.238084	0.254683
1100	Beta-oxidation	Enoyl-CoA hydratase	ech	caiD	Enoyl-CoA hydratase/carnithine racemase (CaiD) (PDB:1DCI)!!!3-hydroxyacyl-CoA dehydrogenase (FadB) (PDB:5ZQZ)	enoyl-CoA hydratase [EC:4.2.1.17]	Enoyl-CoA hydratase/isomerase	93	305	226	0	0	0	0	0	120.623	395.59	293.126	0	0	0	0	0	0.0668664	0.0144455	0.052292	-0.179612	-0.16788	-0.154111	-0.163249	-0.14665
1610	Beta-oxidation	Enoyl-CoA hydratase	ech	caiD	Enoyl-CoA hydratase/carnithine racemase (CaiD) (PDB:1DCI)	enoyl-CoA hydratase [EC:4.2.1.17]	Enoyl-CoA hydratase/isomerase	100	277	185	0	0	0	0	0	127.226	352.417	235.369	0	0	0	0	0	0.0898527	-0.0356709	-0.0428005	-0.187981	-0.176248	-0.162479	-0.171617	-0.155018
42	Beta-oxidation	Hydroxyacyl-CoA dehydrogenase	hadh	caiD	Enoyl-CoA hydratase/carnithine racemase (CaiD) (PDB:1DCI)!!!3-hydroxyacyl-CoA dehydrogenase (FadB) (PDB:5ZQZ)	enoyl-CoA hydratase / 3-hydroxyacyl-CoA dehydrogenase [EC:4.2.1.17 1.1.1.35]	3-hydroxyacyl-CoA dehydrogenase, C-terminal domain	626	1151	1211	0	0	0	0	0	513.957	944.992	994.253	0	0	0	0	0	0.694383	0.392105	0.581954	-0.378205	-0.366473	-0.352704	-0.361842	-0.345243
262	Beta-oxidation	Hydroxyacyl-CoA dehydrogenase	hadh	fadB	3-hydroxyacyl-CoA dehydrogenase (FadB) (PDB:5ZQZ)	3-hydroxyacyl-CoA dehydrogenase [EC:1.1.1.35]	3-hydroxyacyl-CoA dehydrogenase, C-terminal domain	264	883	871	0	0	0	0	0	305.556	1021.99	1008.1	0	0	0	0	0	0.469021	0.426181	0.588032	-0.229072	-0.217339	-0.203571	-0.212709	-0.19611
975	Beta-oxidation	Hydroxyacyl-CoA dehydrogenase	hadh				3-hydroxyacyl-CoA dehydrogenase, NAD binding domain	59	109	92	0	0	0	0	0	180.428	333.333	281.346	0	0	0	0	0	0.243078	-0.058645	0.0358721	0.192894	0.204627	0.218395	0.209257	0.225856
1212	Beta-oxidation	Hydroxyacyl-CoA dehydrogenase	hadh		Dihydrolipoamide dehydrogenase (E3) component of pyruvate/2-oxoglutarate dehydrogenase complex or glutathione oxidoreductase (Lpd) (PDB:6QKG)!!!2,4-dienoyl-CoA reductase or related NADH-dependent reductase, Old Yellow Enzyme (OYE) family (FadH) (PDB:1BWK)	2,4-dienoyl-CoA reductase (NADPH2) [EC:1.3.1.34]	3-hydroxyacyl-CoA dehydrogenase, NAD binding domain	293	685	544	0	0	0	0	0	144.906	338.773	269.041	0	0	0	0	0	0.144936	-0.053285	0.0144949	-0.598339	-0.586607	-0.572838	-0.581976	-0.565377
245	Beta-oxidation	Acetyl-CoA acetyltransferase	acat	paaJ	Acetyl-CoA acetyltransferase (PaaJ) (PDB:1AFW)			112	299	214	0	0	0	0	0	96.7185	258.204	184.801	0	0	0	0	0	-0.0294468	-0.170823	-0.148003	-0.356267	-0.344534	-0.330765	-0.339903	-0.323304
264	Beta-oxidation	Acetyl-CoA acetyltransferase	acat	paaJ	Acetyl-CoA acetyltransferase (PaaJ) (PDB:1AFW)	acetyl-CoA C-acetyltransferase [EC:2.3.1.9]	Beta-ketoacyl synthase, N-terminal domain	202	351	303	0	0	0	0	0	172.65	300	258.974	0	0	0	0	0	0.221348	-0.105772	-0.00174902	-0.360744	-0.349011	-0.335243	-0.344381	-0.327782
565	Beta-oxidation	Acetyl-CoA acetyltransferase	acat	paaJ	Acetyl-CoA acetyltransferase (PaaJ) (PDB:1AFW)	acetyl-CoA C-acetyltransferase [EC:2.3.1.9]	Beta-ketoacyl synthase, N-terminal domain	770	1171	1098	0	0	0	0	0	638.474	970.978	910.448	0	0	0	0	0	0.788535	0.403884	0.543731	-0.373905	-0.362173	-0.348404	-0.357542	-0.340943
566	Beta-oxidation	Acetyl-CoA acetyltransferase	acat	paaJ	Acetyl-CoA acetyltransferase (PaaJ) (PDB:1AFW)	acetyl-CoA C-acetyltransferase [EC:2.3.1.9]	Beta-ketoacyl synthase, N-terminal domain	70	700	579	0	0	0	0	0	58.4795	584.795	483.709	0	0	0	0	0	-0.246796	0.183803	0.269237	-0.370652	-0.35892	-0.345151	-0.354289	-0.33769
896	Beta-oxidation	Acetyl-CoA acetyltransferase	acat	paaJ	Acetyl-CoA acetyltransferase (PaaJ) (PDB:1AFW)	acetyl-CoA C-acetyltransferase [EC:2.3.1.9]	Thiolase, C-terminal domain	65	250	155	0	0	0	0	0	100.309	385.802	239.198	0	0	0	0	0	-0.0122245	0.00372138	-0.0355665	-0.104133	-0.0924006	-0.0786318	-0.0877698	-0.0711708
1237	Beta-oxidation	Acetyl-CoA acetyltransferase	acat	paaJ	Acetyl-CoA acetyltransferase (PaaJ) (PDB:1AFW)		Beta-ketoacyl synthase, N-terminal domain	34	91	63	0	0	0	0	0	64.7619	173.333	120	0	0	0	0	0	-0.199231	-0.34225	-0.333107	-0.0127173	-0.000984904	0.0127839	0.00364593	0.0202449
1238	Beta-oxidation	Acetyl-CoA acetyltransferase	acat	paaJ	Acetyl-CoA acetyltransferase (PaaJ) (PDB:1AFW)			27	82	48	0	0	0	0	0	58.8235	178.649	104.575	0	0	0	0	0	-0.239371	-0.32887	-0.391793	0.0456294	0.0573617	0.0711305	0.0619925	0.0785915
1880	Beta-oxidation	Acetyl-CoA acetyltransferase	acat	paaJ	Acetyl-CoA acetyltransferase (PaaJ) (PDB:1AFW)	acetyl-CoA C-acetyltransferase [EC:2.3.1.9]	Thiolase, C-terminal domain	0	360	279	0	0	0	0	0	0	324.324	251.351	0	0	0	0	0	-2.36324	-0.071929	-0.014663	-0.337881	-0.326149	-0.31238	-0.321518	-0.304919
789	Beta-oxidation	Methylmalonyl-CoA mutase	mcm	sbm	Methylmalonyl-CoA mutase, C-terminal domain/subunit (cobalamin-binding) (Sbm) (PDB:1B1A)	methylmalonyl-CoA mutase, C-terminal domain [EC:5.4.99.2]	B12 binding domain	84	197	185	0	0	0	0	0	183.007	429.194	403.05	0	0	0	0	0	0.248153	0.0502431	0.190809	0.0456294	0.0573617	0.0711305	0.0619925	0.0785915
1485	Beta-oxidation	Methylmalonyl-CoA mutase	mcm	sbm	Methylmalonyl-CoA mutase, N-terminal domain/subunit (Sbm) (PDB:6OXC)	methylmalonyl-CoA mutase, N-terminal domain [EC:5.4.99.2]	Methylmalonyl-CoA mutase	959	809	950	0	0	1	0	2	561.804	473.931	556.532	0	0	0.585823	0	1.17165	0.732921	0.092472	0.329997	-0.524791	-0.513059	-0.022169	-0.508428	0.207141
121	Wood-Ljungdahl	Acetyl-CoA decarbonylase/synthase	acds	cdhE	CO dehydrogenase/acetyl-CoA synthase gamma subunit (corrinoid Fe-S protein) (CdhE) (PDB:2H9A)	4Fe-4S ferredoxin	4Fe-4S binding domain	47	157	94	0	0	0	0	0	254.274	564.103	427.35	2.13675	0	0	0	0	0.390231	0.168668	0.216147	0.514317	0.0489285	0.0626974	0.0535594	0.0701584
197	Wood-Ljungdahl	Acetyl-CoA decarbonylase/synthase	acds	cdhA	CO dehydrogenase/acetyl-CoA synthase alpha subunit (CdhA) (PDB:3CF4)	anaerobic carbon-monoxide dehydrogenase, CODH/ACS complex subunit alpha [EC:1.2.7.4]	4Fe-4S dicluster domain	1540	1610	1651	0	0	0	0	0	608.936	636.615	652.827	0	0	0	0	0	0.767822	0.220501	0.399208	-0.695507	-0.683774	-0.670006	-0.679144	-0.662545
199	Wood-Ljungdahl	Acetyl-CoA decarbonylase/synthase	acds	cdhC	CO dehydrogenase/acetyl-CoA synthase beta subunit (CdhC)		ACS/CODH beta subunit C-terminal	891	980	1111	1	0	0	0	0	607.362	668.03	757.328	0.681663	0	0	0	0	0.7668	0.241506	0.463757	0.0181332	-0.447256	-0.433487	-0.442625	-0.426026
278	Wood-Ljungdahl	Acetyl-CoA decarbonylase/synthase	acds	cdhA	CO dehydrogenase/acetyl-CoA synthase alpha subunit (CdhA) (PDB:3CF4)		Prismane/CO dehydrogenase family	52	142	104	0	0	0	0	0	118.721	324.201	237.443	0	0	0	0	0	0.0617944	-0.0711706	-0.0380797	0.0659679	0.0777003	0.0914691	0.0823311	0.0989301
279	Wood-Ljungdahl	Acetyl-CoA decarbonylase/synthase	acds	cdhA	CO dehydrogenase/acetyl-CoA synthase alpha subunit (CdhA) (PDB:3CF4)		4Fe-4S binding domain	22	81	50	0	0	0	0	0	54.321	200	123.457	0	0	0	0	0	-0.272163	-0.279809	-0.319886	0.099987	0.111719	0.125488	0.11635	0.132949
280	Wood-Ljungdahl	Acetyl-CoA decarbonylase/synthase	acds	cdhC	CO dehydrogenase/acetyl-CoA synthase beta subunit (CdhC)		ACS/CODH beta subunit C-terminal	73	149	97	0	0	0	0	0	94.3152	192.506	125.323	0	0	0	0	0	-0.0393444	-0.297611	-0.315458	-0.181299	-0.169567	-0.155798	-0.164936	-0.148337
283	Wood-Ljungdahl	Acetyl-CoA decarbonylase/synthase	acds	cooC	CO dehydrogenase nickel-insertion accessory protein CooC1 (CooC) (PUBMED:15466042)	CO dehydrogenase maturation factor	AAA domain	88	183	134	0	0	0	0	0	111.111	231.061	169.192	0	0	0	0	0	0.0313273	-0.2186	-0.185725	-0.191283	-0.179551	-0.165782	-0.17492	-0.158321
506	Wood-Ljungdahl	Acetyl-CoA decarbonylase/synthase	acds	cdhD	5,10-methylenetetrahydrofolate reductase (MetF) (PDB:1B5T)!!!CO dehydrogenase/acetyl-CoA synthase delta subunit (corrinoid Fe-S protein) (CdhD)	methylenetetrahydrofolate reductase (NADPH) [EC:1.5.1.20]	Methylenetetrahydrofolate reductase	184	509	525	0	0	0	0	0	195.329	540.34	557.325	0	0	0	0	0	0.275055	0.149582	0.3308	-0.266609	-0.254877	-0.241108	-0.250246	-0.233647
658	Wood-Ljungdahl	Acetyl-CoA decarbonylase/synthase	acds	cooT	Predicted RNA-binding protein	uncharacterized protein	CO dehydrogenase accessory protein CooT	45	25	34	0	0	0	0	0	241.935	134.409	182.796	0	0	0	0	0	0.371608	-0.446484	-0.147416	0.437929	0.449661	0.46343	0.454292	0.470891
834	Wood-Ljungdahl	Acetyl-CoA decarbonylase/synthase	acds	cooC	CO dehydrogenase nickel-insertion accessory protein CooC1 (CooC) (PUBMED:15466042)	CO dehydrogenase maturation factor	AAA domain	80	240	138	0	0	0	0	0	106.667	320	184	0	0	0	0	0	0.0138438	-0.0774575	-0.149333	-0.167619	-0.155887	-0.142118	-0.151256	-0.134657
940	Wood-Ljungdahl	Acetyl-CoA decarbonylase/synthase	acds	cdhE	CO dehydrogenase/acetyl-CoA synthase gamma subunit (corrinoid Fe-S protein) (CdhE) (PDB:2H9A)	acetyl-CoA decarbonylase/synthase, CODH/ACS complex subunit gamma [EC:2.1.1.245]	CO dehydrogenase/acetyl-CoA synthase delta subunit	362	828	780	0	0	0	0	0	257.835	589.744	555.556	0	0	0	0	0	0.39505	0.187414	0.329284	-0.439925	-0.428193	-0.414424	-0.423562	-0.406963
941	Wood-Ljungdahl	Acetyl-CoA decarbonylase/synthase	acds	cooC	CO dehydrogenase/acetyl-CoA synthase delta subunit (corrinoid Fe-S protein) (CdhD)	acetyl-CoA decarbonylase/synthase, CODH/ACS complex subunit delta [EC:2.1.1.245]	CO dehydrogenase/acetyl-CoA synthase delta subunit	322	647	588	0	0	0	0	0	232.323	466.811	424.242	0	0	0	0	0	0.349876	0.0859652	0.212261	-0.434321	-0.422589	-0.40882	-0.417958	-0.401359
943	Wood-Ljungdahl	Acetyl-CoA decarbonylase/synthase	acds	cdhC	CO dehydrogenase nickel-insertion accessory protein CooC1 (CooC) (PUBMED:15466042)	CO dehydrogenase maturation factor	AAA domain	229	353	330	0	0	0	0	0	304.117	468.792	438.247	0	0	0	0	0	0.467097	0.0880831	0.226655	-0.169353	-0.157621	-0.143852	-0.15299	-0.136391
944	Wood-Ljungdahl	Acetyl-CoA decarbonylase/synthase	acds	cdhC	CO dehydrogenase/acetyl-CoA synthase beta subunit (CdhC)	acetyl-CoA decarbonylase/synthase, CODH/ACS complex subunit beta [EC:2.3.1.169]	ACS/CODH beta subunit C-terminal	966	1896	2023	0	0	0	0	0	633.858	1244.09	1327.43	0	0	0	0	0	0.785326	0.511457	0.707396	-0.475543	-0.463811	-0.450042	-0.45918	-0.442581
945	Wood-Ljungdahl	Acetyl-CoA decarbonylase/synthase	acds	cdhB	CO dehydrogenase/acetyl-CoA synthase epsilon subunit (CdhB) (PDB:1YTL)	anaerobic carbon-monoxide dehydrogenase, CODH/ACS complex subunit epsilon	CO dehydrogenase beta subunit/acetyl-CoA synthase epsilon subunit	219	380	396	0	0	0	0	0	405.556	703.704	733.333	0	0	0	0	0	0.59215	0.26445	0.450128	-0.0249517	-0.0132194	0.000549462	-0.00858853	0.00801046
946	Wood-Ljungdahl	Acetyl-CoA decarbonylase/synthase	acds	cdhA	CO dehydrogenase/acetyl-CoA synthase alpha subunit (CdhA) (PDB:3CF4)	anaerobic carbon-monoxide dehydrogenase, CODH/ACS complex subunit alpha [EC:1.2.7.4]	4Fe-4S dicluster domain	1468	2722	3052	0	0	0	0	0	616.289	1142.74	1281.28	0	0	0	0	0	0.773041	0.474515	0.691992	-0.6695	-0.657767	-0.643999	-0.653137	-0.636538
1272	Wood-Ljungdahl	Acetyl-CoA decarbonylase/synthase	acds	cdhE	CO dehydrogenase/acetyl-CoA synthase gamma subunit (corrinoid Fe-S protein) (CdhE) (PDB:2H9A)	acetyl-CoA decarbonylase/synthase, CODH/ACS complex subunit gamma [EC:2.1.1.245]	CO dehydrogenase/acetyl-CoA synthase delta subunit	851	974	819	1	0	0	0	0	594.689	680.643	572.327	0.698812	0	0	0	0	0.757654	0.249631	0.342187	0.0289237	-0.436465	-0.422696	-0.431834	-0.415235
1273	Wood-Ljungdahl	Acetyl-CoA decarbonylase/synthase	acds	cdhD	CO dehydrogenase/acetyl-CoA synthase delta subunit (corrinoid Fe-S protein) (CdhD)	acetyl-CoA decarbonylase/synthase, CODH/ACS complex subunit delta [EC:2.1.1.245]	CO dehydrogenase/acetyl-CoA synthase delta subunit	1218	1257	1175	0	0	0	0	0	812	838	783.333	0	0	0	0	0	0.892843	0.339905	0.47841	-0.468649	-0.456917	-0.443148	-0.452286	-0.435687
1275	Wood-Ljungdahl	Acetyl-CoA decarbonylase/synthase	acds	cdhC	CO dehydrogenase/acetyl-CoA synthase beta subunit (CdhC)		ACS/CODH beta subunit C-terminal	2520	1615	1762	0	0	0	0	0	1673.31	1072.38	1169.99	0	0	0	0	0	1.20677	0.446971	0.652582	-0.470383	-0.458651	-0.444882	-0.45402	-0.437421
1276	Wood-Ljungdahl	Acetyl-CoA decarbonylase/synthase	acds	cdhB	CO dehydrogenase/acetyl-CoA synthase epsilon subunit (CdhB) (PDB:1YTL)	anaerobic carbon-monoxide dehydrogenase, CODH/ACS complex subunit epsilon	CO dehydrogenase beta subunit/acetyl-CoA synthase epsilon subunit	583	367	360	0	0	0	0	0	1091.76	687.266	674.157	0	0	0	0	0	1.02161	0.254205	0.413642	-0.0200992	-0.00836686	0.00540197	-0.00373603	0.012863
1277	Wood-Ljungdahl	Acetyl-CoA decarbonylase/synthase	acds	cdhA	CO dehydrogenase/acetyl-CoA synthase alpha subunit (CdhA) (PDB:3CF4)	anaerobic carbon-monoxide dehydrogenase, CODH/ACS complex subunit alpha [EC:1.2.7.4]	4Fe-4S binding domain	3202	2040	1958	1	0	0	0	0	1334.17	850	815.833	0.416667	0	0	0	0	1.10839	0.346014	0.49599	-0.195648	-0.661037	-0.647268	-0.656406	-0.639807
1287	Wood-Ljungdahl	Acetyl-CoA decarbonylase/synthase	acds	cooC	CO dehydrogenase nickel-insertion accessory protein CooC1 (CooC) (PUBMED:15466042)	CO dehydrogenase maturation factor		33	115	85	0	0	0	0	0	89.4309	311.653	230.352	0	0	0	0	0	-0.0588724	-0.0879557	-0.0507821	0.140416	0.152148	0.165917	0.156779	0.173378
1333	Wood-Ljungdahl	Acetyl-CoA decarbonylase/synthase	acds	cooC	CO dehydrogenase nickel-insertion accessory protein CooC1 (CooC) (PUBMED:15466042)	CO dehydrogenase maturation factor	AAA domain	71	253	194	0	0	0	0	0	94.2895	335.989	257.636	0	0	0	0	0	-0.0393797	-0.0563284	-0.00359723	-0.169353	-0.157621	-0.143852	-0.15299	-0.136391
1612	Wood-Ljungdahl	Acetyl-CoA decarbonylase/synthase	acds	cdhE	Pyruvate:ferredoxin oxidoreductase or related 2-oxoacid:ferredoxin oxidoreductase, delta subunit (PorD) (PDB:5C4I)!!!CO dehydrogenase/acetyl-CoA synthase gamma subunit (corrinoid Fe-S protein) (CdhE) (PDB:2H9A)	4Fe-4S ferredoxin	4Fe-4S binding domain	39	156	108	0	0	0	0	0	85.5263	342.105	236.842	0	0	0	0	0	-0.0792585	-0.0479618	-0.039257	0.0484772	0.0602096	0.0739784	0.0648404	0.0814394
1774	Wood-Ljungdahl	Acetyl-CoA decarbonylase/synthase	acds	cooC	CO dehydrogenase nickel-insertion accessory protein CooC1 (CooC) (PUBMED:15466042)	CO dehydrogenase maturation factor	AAA domain	68	201	169	0	0	0	0	0	131.783	389.535	327.519	0	0	0	0	0	0.10615	0.00811401	0.100798	-0.00520766	0.0065247	0.0202935	0.0111555	0.0277545
506	Wood-Ljungdahl	5,10-methylene-tetrahydrofolate reductase	met	metF	5,10-methylenetetrahydrofolate reductase (MetF) (PDB:1B5T)!!!CO dehydrogenase/acetyl-CoA synthase delta subunit (corrinoid Fe-S protein) (CdhD)	methylenetetrahydrofolate reductase (NADPH) [EC:1.5.1.20]	Methylenetetrahydrofolate reductase	184	509	525	0	0	0	0	0	195.329	540.34	557.325	0	0	0	0	0	0.275055	0.149582	0.3308	-0.266609	-0.254877	-0.241108	-0.250246	-0.233647
1158	Wood-Ljungdahl	5,10-methylene-tetrahydromethanopterin reductase	mer		Flavin-dependent oxidoreductase, luciferase family (includes alkanesulfonate monooxygenase SsuD and methylene tetrahydromethanopterin reductase) (SsuD) (PDB:1BRL)		Luciferase-like monooxygenase	132	344	211	25	24	12	11	11	137.931	359.457	220.481	26.1233	25.0784	12.5392	11.4943	11.4943	0.124413	-0.0272341	-0.0713234	1.4341	1.42846	1.14997	1.10462	1.12122
1314	Wood-Ljungdahl	5,10-methylene-tetrahydromethanopterin reductase	mer		Flavin-dependent oxidoreductase, luciferase family (includes alkanesulfonate monooxygenase SsuD and methylene tetrahydromethanopterin reductase) (SsuD) (PDB:1BRL)	5,10-methylenetetrahydromethanopterin reductase [EC:1.5.98.2]	Luciferase-like monooxygenase	176	477	1781	0	0	0	0	0	137.072	371.495	1387.07	0	0	0	0	0	0.121289	-0.013103	0.726499	-0.401123	-0.389391	-0.375622	-0.38476	-0.368161
1445	Wood-Ljungdahl	5,10-methylene-tetrahydromethanopterin reductase	mer		Flavin-dependent oxidoreductase, luciferase family (includes alkanesulfonate monooxygenase SsuD and methylene tetrahydromethanopterin reductase) (SsuD) (PDB:1BRL)	5,10-methylenetetrahydromethanopterin reductase [EC:1.5.98.2]	Luciferase-like monooxygenase	116	262	163	0	0	0	0	0	110.161	248.813	154.796	0	0	0	0	0	0.0270068	-0.18681	-0.224632	-0.314986	-0.303254	-0.289485	-0.298623	-0.282024
1522	Wood-Ljungdahl	Methenyl-tetrahydromethanopterin cyclohydrolase	mch	mch	Methenyltetrahydromethanopterin cyclohydrolase (Mch) (PDB:1QLM)	methenyltetrahydromethanopterin cyclohydrolase [EC:3.5.4.27]	Cyclohydrolase (MCH)	235	471	465	0	0	0	0	0	244.029	489.097	482.866	0	0	0	0	0	0.371474	0.106344	0.268572	-0.276184	-0.264452	-0.250683	-0.259821	-0.243222
1203	Wood-Ljungdahl	Formylmethanofuran-tetrahydromethanopterin formyltransferase	ftr	ftr	Formylmethanofuran:tetrahydromethanopterin formyltransferase (Ftr) (PDB:1FTR)	formylmethanofuran--tetrahydromethanopterin N-formyltransferase [EC:2.3.1.101]	Formylmethanofuran-tetrahydromethanopterin formyltransferase	106	239	176	0	0	0	0	0	118.172	266.444	196.21	0	0	0	0	0	0.0576664	-0.156998	-0.12177	-0.24535	-0.233618	-0.219849	-0.228987	-0.212388
1246	Wood-Ljungdahl	Formylmethanofuran-tetrahydromethanopterin formyltransferase	ftr	ftr	Formylmethanofuran:tetrahydromethanopterin formyltransferase (Ftr) (PDB:1FTR)	formylmethanofuran--tetrahydromethanopterin N-formyltransferase [EC:2.3.1.101]	Formylmethanofuran-tetrahydromethanopterin formyltransferase	339	360	363	0	0	0	0	0	376.667	400	403.333	0	0	0	0	0	0.559706	0.0191514	0.19054	-0.2468	-0.235068	-0.221299	-0.230437	-0.213838
22	Wood-Ljungdahl	Formylmethanofuran dehydrogenase	fwd	fwdB	Formylmethanofuran dehydrogenase subunit B (FwdB) (PDB:5T5I)	formylmethanofuran dehydrogenase subunit B [EC:1.2.7.12]	Molybdopterin oxidoreductase	177	515	319	0	0	0	0	0	138.173	402.03	249.024	0	0	0	0	0	0.124758	0.0211682	-0.0188001	-0.400107	-0.388375	-0.374606	-0.383744	-0.367145
418	Wood-Ljungdahl	Formylmethanofuran dehydrogenase	fwd	fwdE	Formylmethanofuran dehydrogenase subunit E (FwdE) (PDB:2GLZ)	formylmethanofuran dehydrogenase subunit E [EC:1.2.7.12]	FmdE, Molybdenum formylmethanofuran dehydrogenase operon	60	221	133	0	0	0	0	0	140.845	518.779	312.207	0	0	0	0	0	0.135455	0.132453	0.0803498	0.0780324	0.0897648	0.103534	0.0943956	0.110995
774	Wood-Ljungdahl	Formylmethanofuran dehydrogenase	fwd	fwdD	Formylmethanofuran dehydrogenase subunit D (FwdD) (PDB:2KI8)	formylmethanofuran dehydrogenase subunit D [EC:1.2.7.12]	Molydopterin dinucleotide binding domain	37	164	92	0	0	0	0	0	83.3333	369.369	207.207	0	0	0	0	0	-0.0902425	-0.0147284	-0.0969631	0.0600591	0.0717914	0.0855603	0.0764223	0.0930213
1268	Wood-Ljungdahl	Formylmethanofuran dehydrogenase	fwd	fwdE	Formylmethanofuran dehydrogenase subunit E (FwdE) (PDB:2GLZ)	formylmethanofuran dehydrogenase subunit E [EC:1.2.7.12]	FmdE, Molybdenum formylmethanofuran dehydrogenase operon	81	203	134	0	0	0	0	0	104.651	262.274	173.127	0	0	0	0	0	0.00552585	-0.163688	-0.175741	-0.181299	-0.169567	-0.155798	-0.164936	-0.148337
1536	Wood-Ljungdahl	Formylmethanofuran dehydrogenase	fwd	fwdB	Formylmethanofuran dehydrogenase subunit B (FwdB) (PDB:5T5I)	formylmethanofuran dehydrogenase subunit B [EC:1.2.7.12]		150	426	337	0	0	0	0	0	107.527	305.376	241.577	0	0	0	0	0	0.0160715	-0.0981665	-0.0320223	-0.437132	-0.4254	-0.411631	-0.420769	-0.40417
1549	Wood-Ljungdahl	Formylmethanofuran dehydrogenase	fwd	fwdD	Formylmethanofuran dehydrogenase subunit D (FwdD) (PDB:2KI8)	formylmethanofuran dehydrogenase subunit D [EC:1.2.7.12]	Molydopterin dinucleotide binding domain	96	174	183	0	0	0	0	0	250	453.125	476.562	0	0	0	0	0	0.383305	0.0739529	0.263583	0.123111	0.134843	0.148612	0.139474	0.156073
1550	Wood-Ljungdahl	Formylmethanofuran dehydrogenase	fwd	fwdB	Formylmethanofuran dehydrogenase subunit B (FwdB) (PDB:5T5I)	formylmethanofuran dehydrogenase subunit B [EC:1.2.7.12]	Molybdopterin oxidoreductase	216	551	453	0	1	0	0	0	166.282	424.172	348.73	0	0.769823	0	0	0	0.204958	0.044425	0.127246	-0.406167	0.0826865	-0.380666	-0.389804	-0.373205
1551	Wood-Ljungdahl	Formylmethanofuran dehydrogenase	fwd	fwdA	Formylmethanofuran dehydrogenase subunit A (FwdA) (PDB:5T5I)	formylmethanofuran dehydrogenase subunit A [EC:1.2.7.12]	Amidohydrolase family	484	909	785	0	0	0	0	0	285.546	536.283	463.127	0	0	0	0	0	0.439233	0.146122	0.250255	-0.521728	-0.509995	-0.496226	-0.505364	-0.488765
1552	Wood-Ljungdahl	Formylmethanofuran dehydrogenase	fwd	fwdC	Formylmethanofuran dehydrogenase subunit C (FwdC) (PDB:5T5I)	formylmethanofuran dehydrogenase subunit C [EC:1.2.7.12]	GXGXG motif	340	624	500	0	0	0	1	0	429.293	787.879	631.313	0	0	0	1.26263	0	0.616501	0.313296	0.384957	-0.191283	-0.179551	-0.165782	0.302201	-0.158321
1862	Wood-Ljungdahl	Formylmethanofuran dehydrogenase	fwd	fmdE		formylmethanofuran dehydrogenase subunit E [EC:1.2.7.12]	FmdE, Molybdenum formylmethanofuran dehydrogenase operon	103	357	235	0	0	0	1	0	99.5169	344.928	227.053	0	0	0	0.966184	0	-0.0168908	-0.0451756	-0.0586713	-0.307498	-0.295766	-0.281997	0.185986	-0.274536
95	Cofactor recycling	Heterodisulfide reductase	hdr	hdrC	Heterodisulfide reductase, subunit C (HdrC) (PDB:5ODC)	heterodisulfide reductase subunit C2 [EC:1.8.7.3 1.8.98.4 1.8.98.5 1.8.98.6]	4Fe-4S dicluster domain	100	149	97	0	0	0	0	0	157.233	234.277	152.516	0	0	0	0	0	0.181818	-0.212327	-0.230174	-0.0960151	-0.0842827	-0.0705139	-0.0796519	-0.0630529
96	Cofactor recycling	Heterodisulfide reductase	hdr	hdrB	Heterodisulfide reductase, subunit B (HdrB) (PDB:5ODC)	heterodisulfide reductase subunit B2 [EC:1.8.7.3 1.8.98.4 1.8.98.5 1.8.98.6]	Cysteine-rich domain	130	318	211	0	0	0	0	0	148.402	363.014	240.868	0	0	0	0	0	0.156216	-0.022906	-0.0329156	-0.235062	-0.22333	-0.209561	-0.218699	-0.2021
102	Cofactor recycling	Heterodisulfide reductase	hdr	hdrA	Heterodisulfide reductase, subunit A (polyferredoxin) (HdrA) (PDB:5ODC)	heterodisulfide reductase subunit A2 [EC:1.8.7.3 1.8.98.4 1.8.98.5 1.8.98.6]	FAD binding domain	510	1026	925	0	0	0	0	0	260.337	523.737	472.18	0	0	0	0	0	0.399071	0.135813	0.25862	-0.584592	-0.57286	-0.559091	-0.568229	-0.55163
348	Cofactor recycling	Heterodisulfide reductase	hdr	hdrA	NADPH-dependent glutamate synthase beta chain or related oxidoreductase (GltD) (PDB:1H7X)!!!Heterodisulfide reductase, subunit A (polyferredoxin) (HdrA) (PDB:5ODC)	heterodisulfide reductase subunit A2 [EC:1.8.7.3 1.8.98.4 1.8.98.5 1.8.98.6]	Alanine dehydrogenase/PNT, C-terminal domain	850	2169	1507	24	32	15	14	7	247.886	632.546	439.487	6.99913	9.33217	4.37445	4.08282	2.04141	0.377616	0.217681	0.227368	0.862471	0.99692	0.689137	0.651036	0.381328
350	Cofactor recycling	Heterodisulfide reductase	hdr	hdrA	Heterodisulfide reductase, subunit A (polyferredoxin) (HdrA) (PDB:5ODC)	heterodisulfide reductase subunit A2 [EC:1.8.7.3 1.8.98.4 1.8.98.5 1.8.98.6]	Alanine dehydrogenase/PNT, C-terminal domain	565	1159	829	0	0	0	0	0	182.494	374.354	267.765	0	0	0	0	0	0.244741	-0.0100415	0.0122936	-0.783359	-0.771627	-0.757858	-0.766996	-0.750397
359	Cofactor recycling	Heterodisulfide reductase	hdr	hdrD	Fe-S cluster-containing oxidoreductase, includes glycolate oxidase subunit GlcF (GlpC)	heterodisulfide reductase subunit D [EC:1.8.98.1]	Cysteine-rich domain	182	600	332	0	0	0	0	0	168.519	555.556	307.407	0	0	0	0	0	0.210948	0.161578	0.072646	-0.325982	-0.314249	-0.300481	-0.309619	-0.29302
361	Cofactor recycling	Heterodisulfide reductase	hdr	hdrC	Heterodisulfide reductase, subunit C (HdrC) (PDB:5ODC)	heterodisulfide reductase subunit C2 [EC:1.8.7.3 1.8.98.4 1.8.98.5 1.8.98.6]	4Fe-4S dicluster domain	252	292	245	0	0	0	0	0	424.242	491.582	412.458	0	0	0	0	0	0.611584	0.108828	0.200543	-0.0663444	-0.054612	-0.0408432	-0.0499812	-0.0333822
362	Cofactor recycling	Heterodisulfide reductase	hdr	hdrB	Heterodisulfide reductase, subunit B (HdrB) (PDB:5ODC)	heterodisulfide reductase subunit B2 [EC:1.8.7.3 1.8.98.4 1.8.98.5 1.8.98.6]	Cysteine-rich domain	189	297	216	0	0	0	0	0	207.237	325.658	236.842	0	0	0	0	0	0.300724	-0.0700192	-0.0402588	-0.252553	-0.24082	-0.227052	-0.23619	-0.219591
445	Cofactor recycling	Heterodisulfide reductase	hdr	hdrA	Heterodisulfide reductase, subunit A (polyferredoxin) (HdrA) (PDB:5ODC)	heterodisulfide reductase subunit A2 [EC:1.8.7.3 1.8.98.4 1.8.98.5 1.8.98.6]	FAD dependent oxidoreductase	476	664	626	0	0	0	0	0	244.479	341.037	321.52	0	0	0	0	0	0.371806	-0.0503823	0.0918333	-0.581924	-0.570192	-0.556423	-0.565561	-0.548962
1625	Cofactor recycling	Heterodisulfide reductase	hdr	hdrA	Heterodisulfide reductase, subunit A (polyferredoxin) (HdrA) (PDB:5ODC)	heterodisulfide reductase subunit A2 [EC:1.8.7.3 1.8.98.4 1.8.98.5 1.8.98.6]	Flavin containing amine oxidoreductase	211	583	440	0	0	0	0	0	122.532	338.56	255.517	0	0	0	0	0	0.0723864	-0.0535036	-0.00780909	-0.528591	-0.516859	-0.50309	-0.512228	-0.495629
1626	Cofactor recycling	Heterodisulfide reductase	hdr	hdrA	Heterodisulfide reductase, subunit A (polyferredoxin) (HdrA) (PDB:5ODC)	heterodisulfide reductase subunit A2 [EC:1.8.7.3 1.8.98.4 1.8.98.5 1.8.98.6]	FAD dependent oxidoreductase	233	611	630	0	0	0	0	0	175.716	460.784	475.113	0	0	0	0	0	0.228853	0.0803416	0.26142	-0.415101	-0.403369	-0.3896	-0.398738	-0.382139
1628	Cofactor recycling	Heterodisulfide reductase	hdr	hdrD	Fe-S cluster-containing oxidoreductase, includes glycolate oxidase subunit GlcF (GlpC)	heterodisulfide reductase subunit D [EC:1.8.98.1]	Cysteine-rich domain	130	455	349	0	0	0	0	0	114.336	400.176	306.948	0	0	0	0	0	0.0429593	0.0192166	0.0719649	-0.348318	-0.336586	-0.322817	-0.331955	-0.315356
94	Cofactor recycling	[FeS]-oxidoreductase	FeS-or		Fe-S cluster-containing oxidoreductase, includes glycolate oxidase subunit GlcF (GlpC)	dimethylglycine catabolism B	Cysteine-rich domain	257	552	487	0	0	0	1	0	227.233	488.064	430.592	0	0	0	0.884173	0	0.340424	0.105358	0.21879	-0.346021	-0.334288	-0.320519	0.147464	-0.313058
349	Cofactor recycling	[FeS]-oxidoreductase	FeS-or		Fe-S cluster-containing oxidoreductase, includes glycolate oxidase subunit GlcF (GlpC)!!!Coenzyme F420-reducing hydrogenase, delta subunit (FrhD) (PDB:5ODC)	F420-non-reducing hydrogenase iron-sulfur subunit [EC:1.12.99.- 1.8.98.5 1.8.98.6]	Cysteine-rich domain	253	697	598	0	0	0	0	0	148.474	409.038	350.939	0	0	0	0	0	0.155618	0.0285633	0.129873	-0.524028	-0.512295	-0.498526	-0.507664	-0.491065
359	Cofactor recycling	[FeS]-oxidoreductase	FeS-or		Fe-S cluster-containing oxidoreductase, includes glycolate oxidase subunit GlcF (GlpC)	heterodisulfide reductase subunit D [EC:1.8.98.1]	Cysteine-rich domain	182	600	332	0	0	0	0	0	168.519	555.556	307.407	0	0	0	0	0	0.210948	0.161578	0.072646	-0.325982	-0.314249	-0.300481	-0.309619	-0.29302
1627	Cofactor recycling	[FeS]-oxidoreductase	FeS-or		Fe-S cluster-containing oxidoreductase, includes glycolate oxidase subunit GlcF (GlpC)!!!NADPH-dependent glutamate synthase beta chain or related oxidoreductase (GltD) (PDB:1H7X)		Alanine dehydrogenase/PNT, C-terminal domain	423	1246	1059	0	0	0	0	0	157.895	465.099	395.297	0	0	0	0	0	0.18199	0.0842082	0.181406	-0.720531	-0.708798	-0.695029	-0.704167	-0.687568
1628	Cofactor recycling	[FeS]-oxidoreductase	FeS-or		Fe-S cluster-containing oxidoreductase, includes glycolate oxidase subunit GlcF (GlpC)	heterodisulfide reductase subunit D [EC:1.8.98.1]	Cysteine-rich domain	130	455	349	0	0	0	0	0	114.336	400.176	306.948	0	0	0	0	0	0.0429593	0.0192166	0.0719649	-0.348318	-0.336586	-0.322817	-0.331955	-0.315356
23	Cofactor recycling	NADH dehydrogenase	ndh	ndh	NADH dehydrogenase, FAD-containing subunit (Ndh) (PDB:5NA4)	NADH:ubiquinone reductase (H+-translocating) [EC:7.1.1.2]	L-lysine 6-monooxygenase/L-ornithine 5-monooxygenase	232	581	427	0	0	0	0	0	210.145	526.268	386.775	0	0	0	0	0	0.306563	0.138069	0.172245	-0.335527	-0.323795	-0.310026	-0.319164	-0.302565
511	Cofactor recycling	NADH dehydrogenase	ndh		NADH:ubiquinone oxidoreductase 27 kD subunit (chain C) (NuoC)		Respiratory-chain NADH dehydrogenase, 30 Kd subunit	84	259	115	1	0	0	0	0	172.84	532.922	236.626	2.05761	0	0	0	0	0.22333	0.14399	-0.0397761	0.497927	0.0325381	0.046307	0.037169	0.053768
512	Cofactor recycling	NADH dehydrogenase	ndh		Ni,Fe-hydrogenase III large subunit (HycE2) (PDB:6CFW)	ech hydrogenase subunit E	Respiratory-chain NADH dehydrogenase, 49 Kd subunit	129	445	350	0	0	0	0	0	109.974	379.369	298.38	0	0	0	0	0	0.026081	-0.00396164	0.0596682	-0.361856	-0.350124	-0.336355	-0.345493	-0.328894
513	Cofactor recycling	NADH dehydrogenase	ndh		Formate hydrogenlyase subunit HyfC (HyfC) (PDB:6CFW)		NADH dehydrogenase	82	293	218	0	0	0	0	0	87.0488	311.04	231.423	0	0	0	0	0	-0.0744877	-0.0899541	-0.0503213	-0.266609	-0.254877	-0.241108	-0.250246	-0.233647
748	Cofactor recycling	NADH dehydrogenase	ndh		NADH:ubiquinone oxidoreductase subunit 1 (chain H) (NuoH) (PDB:6HUM)	F420H2:quinone oxidoreductase subunit H [EC:1.1.98.4]	NADH dehydrogenase	144	319	296	0	0	0	0	0	129.38	286.613	265.948	0	0	0	0	0	0.0964819	-0.125536	0.00980767	-0.339053	-0.327321	-0.313552	-0.32269	-0.306091
749	Cofactor recycling	NADH dehydrogenase	ndh		NADH:ubiquinone oxidoreductase 49 kD subunit (chain D) (NuoD) (PDB:2FUG)		Respiratory-chain NADH dehydrogenase, 30 Kd subunit	336	989	665	0	0	0	0	0	146.405	430.937	289.76	0	0	0	0	0	0.149312	0.0511218	0.0466435	-0.653341	-0.641608	-0.627839	-0.636977	-0.620378
1058	Cofactor recycling	NADH dehydrogenase	ndh	ndh	NADH dehydrogenase, FAD-containing subunit (Ndh) (PDB:5NA4)	sulfide:quinone oxidoreductase [EC:1.8.5.4]	Pyridine nucleotide-disulphide oxidoreductase	285	538	528	0	0	0	0	0	240.506	454.008	445.57	0	0	0	0	0	0.364997	0.073956	0.233605	-0.366276	-0.354544	-0.340775	-0.349913	-0.333314
1344	Cofactor recycling	NADH dehydrogenase	ndh	ndh	NADH dehydrogenase, FAD-containing subunit (Ndh) (PDB:5NA4)	NADH:ubiquinone reductase (H+-translocating) [EC:7.1.1.2]	FAD dependent oxidoreductase	366	1060	727	0	0	0	0	0	283.721	821.705	563.566	0	0	0	0	0	0.436593	0.33141	0.335521	-0.403148	-0.391415	-0.377646	-0.386784	-0.370185
747	Cofactor recycling	F420H2:quinone oxidoreductase	fqo	fqoI	Formate hydrogenlyase subunit 6/NADH:ubiquinone oxidoreductase 23 kD subunit (chain I) (NuoI) (PDB:1B0P)	F420H2:quinone oxidoreductase subunit I [EC:1.1.98.4]	4Fe-4S binding domain	81	241	174	0	0	0	0	0	110.204	327.891	236.735	0	0	0	0	0	0.0279795	-0.0668815	-0.0402138	-0.158845	-0.147113	-0.133344	-0.142482	-0.125883
748	Cofactor recycling	F420H2:quinone oxidoreductase	fqo	fqoH	NADH:ubiquinone oxidoreductase subunit 1 (chain H) (NuoH) (PDB:6HUM)	F420H2:quinone oxidoreductase subunit H [EC:1.1.98.4]	NADH dehydrogenase	144	319	296	0	0	0	0	0	129.38	286.613	265.948	0	0	0	0	0	0.0964819	-0.125536	0.00980767	-0.339053	-0.327321	-0.313552	-0.32269	-0.306091
749	Cofactor recycling	F420H2:quinone oxidoreductase	fqo		NADH:ubiquinone oxidoreductase 49 kD subunit (chain D) (NuoD) (PDB:2FUG)		Respiratory-chain NADH dehydrogenase, 30 Kd subunit	336	989	665	0	0	0	0	0	146.405	430.937	289.76	0	0	0	0	0	0.149312	0.0511218	0.0466435	-0.653341	-0.641608	-0.627839	-0.636977	-0.620378
750	Cofactor recycling	F420H2:quinone oxidoreductase	fqo		GTPase-interacting Yip1 domain (Yip1) (PUBMED:25702751;31417902)		Yip1 domain	50	130	126	0	0	0	0	0	82.9187	215.589	208.955	0	0	0	0	0	-0.0939167	-0.248218	-0.0939486	-0.0728753	-0.0611429	-0.0473741	-0.0565121	-0.0399131
751	Cofactor recycling	F420H2:quinone oxidoreductase	fqo	fqoA	NADH:ubiquinone oxidoreductase subunit 3 (chain A) (NuoA) (PDB:3RKO)	F420H2:quinone oxidoreductase subunit A [EC:1.1.98.4]	NADH-ubiquinone/plastoquinone oxidoreductase, chain 3	60	126	69	0	0	0	0	0	168.067	352.941	193.277	0	0	0	0	0	0.212196	-0.034089	-0.126405	0.154774	0.166506	0.180275	0.171137	0.187736
752	Cofactor recycling	F420H2:quinone oxidoreductase	fqo	fqoN	NADH:ubiquinone oxidoreductase subunit 2 (chain N) (NuoN) (PDB:4HE8)	F420H2:quinone oxidoreductase subunit N [EC:1.1.98.4]	Proton-conducting membrane transporter	91	368	269	0	0	0	0	0	71.205	287.95	210.485	0	0	0	0	0	-0.162001	-0.123605	-0.0916939	-0.399089	-0.387356	-0.373588	-0.382726	-0.366127
753	Cofactor recycling	F420H2:quinone oxidoreductase	fqo	fqoL	Membrane H+-translocase/NADH:ubiquinone oxidoreductase subunit 5 (chain L)/Multisubunit Na+/H+ antiporter, MnhA subunit (NuoL) (PDB:3RKO)	F420H2:quinone oxidoreductase subunit L [EC:1.1.98.4]	Proton-conducting membrane transporter	314	575	448	0	0	0	0	0	161.772	296.239	230.809	0	0	0	0	0	0.192704	-0.111492	-0.0519849	-0.580583	-0.568851	-0.555082	-0.56422	-0.547621
754	Cofactor recycling	F420H2:quinone oxidoreductase	fqo	fqoM	Formate hydrogenlyase subunit 3/Multisubunit Na+/H+ antiporter, MnhD subunit (HyfB) (PDB:6CFW)	F420H2:quinone oxidoreductase subunit M [EC:1.1.98.4]	Proton-conducting membrane transporter	233	666	454	0	0	0	0	0	159.48	455.852	310.746	0	0	0	0	0	0.186746	0.0756386	0.0771618	-0.457208	-0.445476	-0.431707	-0.440845	-0.424246
755	Cofactor recycling	F420H2:quinone oxidoreductase	fqo	fqoK		F420H2:quinone oxidoreductase subunit K [EC:1.1.98.4]		21	85	56	0	0	0	0	0	74.4681	301.418	198.582	0	0	0	0	0	-0.134701	-0.101794	-0.113923	0.257193	0.268925	0.282694	0.273556	0.290155
756	Cofactor recycling	F420H2:quinone oxidoreductase	fqo	fqoJ	NADH:ubiquinone oxidoreductase subunit 6 (chain J) (NuoJ) (PDB:4HE8)	F420H2:quinone oxidoreductase subunit J [EC:1.1.98.4]		56	182	146	0	0	0	0	0	124.444	404.444	324.444	0	0	0	0	0	0.0819451	0.024539	0.0969033	0.0542295	0.0659619	0.0797307	0.0705927	0.0871917
92	Electron transport	Electron transfer flavoprotein	etf	fixB	Electron transfer flavoprotein, alpha subunit FixB (FixB) (PDB:1EFP)	electron transfer flavoprotein alpha subunit	Electron transfer flavoprotein domain	261	399	380	0	0	0	0	0	264.438	404.255	385.005	0	0	0	0	0	0.406264	0.0236883	0.170316	-0.286875	-0.275143	-0.261374	-0.270512	-0.253913
93	Electron transport	Electron transfer flavoprotein	etf	fixA	Electron transfer flavoprotein, alpha and beta subunits (FixA) (PDB:5OL2)	electron transfer flavoprotein beta subunit	Electron transfer flavoprotein domain	243	496	441	0	0	0	0	0	303.371	619.226	550.562	0	0	0	0	0	0.465976	0.208775	0.325576	-0.19619	-0.184458	-0.170689	-0.179827	-0.163228
878	Electron transport	Electron transfer flavoprotein	etf	fixA	Electron transfer flavoprotein, alpha and beta subunits (FixA) (PDB:5OL2)	electron transfer flavoprotein beta subunit	Electron transfer flavoprotein domain	124	299	234	0	0	0	0	0	148.148	357.228	279.57	0	0	0	0	0	0.155553	-0.02984	0.0316955	-0.215283	-0.203551	-0.189782	-0.19892	-0.182321
898	Electron transport	Electron transfer flavoprotein	etf	fixB	Electron transfer flavoprotein, alpha subunit FixB (FixB) (PDB:1EFP)	electron transfer flavoprotein alpha subunit	Electron transfer flavoprotein domain	168	422	283	0	0	0	0	0	166.667	418.651	280.754	0	0	0	0	0	0.206249	0.0388548	0.0333707	-0.296018	-0.284286	-0.270517	-0.279655	-0.263056
1705	Electron transport	Flagellin B	flaB	flaB	Archaellin (archaeal flagellin) (FlaB) (PDB:5O4U)	archaeal flagellin FlaB	Archaebacterial flagellin	850	2410	11751	3	0	0	0	0	1409.62	3996.68	19487.6	4.97512	0	0	0	0	1.13247	1.01828	1.87405	0.772223	-0.0611429	-0.0473741	-0.0565121	-0.0399131
252	Electron transport	Type IV pilin	pilA	pilA		archaeal type IV pilus assembly protein PilA		180	320	227	0	0	0	0	0	216.606	385.078	273.165	0	0	0	0	0	0.319985	0.00271567	0.0216585	-0.212159	-0.200427	-0.186658	-0.195796	-0.179197
327	Electron transport	Type IV pilin	pilA	pilA	Serine protease, subtilisin family (AprE) (PDB:1SCJ)!!!Uncharacterized conserved protein, PKD repeat domain (PDB:2KZW)	archaeal type IV pilus assembly protein PilA	Bacterial Ig domain	266	407	247	9	14	10	3	4	172.168	263.43	159.871	5.82524	9.06149	6.47249	1.94175	2.589	0.219878	-0.162312	-0.211075	0.797267	0.992644	0.866234	0.379975	0.505718
331	Electron transport	Type IV pilin	pilA	pilA	Archaeal flagellin (archaellin), FlaG/FlaF family	archaeal type IV pilus assembly protein PilA	Archaeal Type IV pilin, N-terminal	879	326	1467	0	0	0	0	0	1744.05	646.825	2910.71	0	0	0	0	0	1.22491	0.227941	1.04843	0.0050115	0.0167439	0.0305127	0.0213747	0.0379737
1674	Electron transport	Type IV pilin	pilA	pilA	Archaeal flagellin (archaellin), FlaG/FlaF family	archaeal type IV pilus assembly protein PilA	Archaeal Type IV pilin, N-terminal	422	594	1239	0	1	0	1	1	1065.66	1500	3128.79	0	2.52525	0	2.52525	2.52525	1.01124	0.592945	1.07983	0.109747	0.5986	0.135248	0.603231	0.61983
134	Electron transport	[NiFe]-hydrogenase	hyd	hyaD	Ni,Fe-hydrogenase maturation factor (HyaD) (PDB:1CFZ) (PUBMED:15294295)	hydrogenase maturation protease [EC:3.4.23.-]	Hydrogenase maturation protease	85	193	161	0	0	0	0	0	163.776	371.869	310.212	0	0	0	0	0	0.199908	-0.0119977	0.0772833	-0.00772532	0.00400704	0.0177759	0.00863787	0.0252369
507	Electron transport	[NiFe]-hydrogenase	hyd	hycG	Ni,Fe-hydrogenase III small subunit (HycG) (PDB:6CFW)	membrane-bound hydrogenase subunit mbhJ [EC:1.12.7.2]	NADH ubiquinone oxidoreductase, 20 Kd subunit	267	651	584	1	0	0	0	0	526.627	1284.02	1151.87	1.97239	0	0	0	0	0.705425	0.525395	0.646055	0.479555	0.0141664	0.0279353	0.0187973	0.0353963
512	Electron transport	[NiFe]-hydrogenase	hyd	hycE2	Ni,Fe-hydrogenase III large subunit (HycE2) (PDB:6CFW)	ech hydrogenase subunit E	Respiratory-chain NADH dehydrogenase, 49 Kd subunit	129	445	350	0	0	0	0	0	109.974	379.369	298.38	0	0	0	0	0	0.026081	-0.00396164	0.0596682	-0.361856	-0.350124	-0.336355	-0.345493	-0.328894
1038	Electron transport	[NiFe]-hydrogenase	hyd	hyaA	Ni,Fe-hydrogenase I small subunit (HyaA) (PDB:6FPI)	hydrogenase small subunit [EC:1.12.99.6]	NiFe/NiFeSe hydrogenase small subunit C-terminal	184	344	208	0	0	0	0	0	192.872	360.587	218.029	0	0	0	0	0	0.269557	-0.0258705	-0.0761642	-0.272106	-0.260374	-0.246605	-0.255743	-0.239144
1039	Electron transport	[NiFe]-hydrogenase	hyd	hyaB	Ni,Fe-hydrogenase I large subunit (HyaB) (PDB:6FPI) (PUBMED:25905665)	hydrogenase large subunit [EC:1.12.99.6]	Nickel-dependent hydrogenase	300	729	594	1	0	0	0	0	173.913	422.609	344.348	0.57971	0	0	0	0	0.224165	0.0427249	0.121641	-0.0522258	-0.517615	-0.503846	-0.512984	-0.496385
1040	Electron transport	[NiFe]-hydrogenase	hyd	hyaD	Ni,Fe-hydrogenase maturation factor (HyaD) (PDB:1CFZ) (PUBMED:15294295)	hydrogenase maturation protease [EC:3.4.23.-]	Hydrogenase maturation protease	52	176	88	0	0	0	0	0	107.66	364.389	182.195	0	0	0	0	0	0.0193214	-0.0207138	-0.152726	0.0234949	0.0352273	0.0489961	0.0398581	0.0564571
1609	Electron transport	[NiFe]-hydrogenase	hyd	hyaD	Ni,Fe-hydrogenase maturation factor (HyaD) (PDB:1CFZ) (PUBMED:15294295)	hydrogenase 3 maturation protease [EC:3.4.23.51]	Hydrogenase maturation protease	47	104	68	0	0	0	0	0	91.0853	201.55	131.783	0	0	0	0	0	-0.0528469	-0.277045	-0.292681	-0.00520766	0.0065247	0.0202935	0.0111555	0.0277545
498	Electron transport	Formate dehydrogenase	fdh		Coenzyme F420-reducing hydrogenase, beta subunit (FrhB) (PDB:3ZFS)!!!L-lactate utilization protein LutB, contains a ferredoxin-type domain (LutB)	formate dehydrogenase (coenzyme F420) beta subunit [EC:1.17.98.3 1.8.98.6]	4Fe-4S dicluster domain	249	599	534	0	0	0	0	0	203.931	490.581	437.346	0	0	0	0	0	0.293464	0.107562	0.22551	-0.379274	-0.367541	-0.353772	-0.36291	-0.346311
499	Electron transport	Formate dehydrogenase	fdh		Predicted molibdopterin-dependent oxidoreductase YjgC (YjgC) (PDB:1AA6)	formate dehydrogenase major subunit [EC:1.17.1.9]	Molybdopterin oxidoreductase	429	909	680	0	0	0	0	0	210.604	446.244	333.824	0	0	0	0	0	0.307081	0.0663003	0.108115	-0.601549	-0.589817	-0.576048	-0.585186	-0.568587
317	Electron transport	Formate dehydrogenase	fdh		Formate dehydrogenase assembly factor FdhD, a sulfurtransferase (FdhD) (PDB:2PW9)	FdhD protein	FdhD/NarQ family	148	343	215	1	7	1	2	1	196.547	455.511	285.525	1.32802	9.29615	1.32802	2.65604	1.32802	0.282832	0.0795567	0.0539227	0.320783	1.02669	0.347519	0.55608	0.35279
1011	Electron transport	Formate dehydrogenase	fdh		Coenzyme F420-reducing hydrogenase, beta subunit (FrhB) (PDB:3ZFS)!!!Na+-translocating ferredoxin:NAD+ oxidoreductase RNF, RnfC subunit (RnfC)	formate dehydrogenase (coenzyme F420) beta subunit [EC:1.17.98.3 1.8.98.6]	4Fe-4S binding domain	224	477	389	0	0	0	0	0	188.552	401.515	327.441	0	0	0	0	0	0.2643	0.0245818	0.112961	-0.354359	-0.347419	-0.327623	-0.340912	-0.322353
Additional genes
518	Potential alkyl-CoM to acyl-CoA conversion	Aldehyde:ferredoxin reductase	aor	ydhV	Aldehyde:ferredoxin oxidoreductase (YdhV) (PDB:1AOR)		Aldehyde ferredoxin oxidoreductase, N-terminal domain	10	140	101	0	0	0	0	0	27.3224	382.514	275.956	0	0	0	0	0	-0.559183	0.000683899	0.0272631	0.143961	0.155693	0.169462	0.160324	0.176923
519	Potential alkyl-CoM to acyl-CoA conversion	Aldehyde:ferredoxin reductase	aor	ydhV	Aldehyde:ferredoxin oxidoreductase (YdhV) (PDB:1AOR)	aldehyde:ferredoxin oxidoreductase [EC:1.2.7.5]	Aldehyde ferredoxin oxidoreductase, domains 2 & 3	13	240	177	0	0	0	0	0	8.75421	161.616	119.192	0	0	0	0	0	-1.05828	-0.374123	-0.33825	-0.464284	-0.452552	-0.438783	-0.447921	-0.431322
634	Potential alkyl-CoM to acyl-CoA conversion	Aldehyde:ferredoxin reductase	aor	ydhV	Aldehyde:ferredoxin oxidoreductase (YdhV) (PDB:1AOR)	aldehyde:ferredoxin oxidoreductase [EC:1.2.7.5]	Aldehyde ferredoxin oxidoreductase, domains 2 & 3	237	617	423	0	0	0	0	0	134.812	350.967	240.614	0	0	0	0	0	0.113754	-0.0378932	-0.0338873	-0.537577	-0.525844	-0.512076	-0.521214	-0.504615
690	Potential alkyl-CoM to acyl-CoA conversion	Aldehyde:ferredoxin reductase	aor	ydhV	Aldehyde:ferredoxin oxidoreductase (YdhV) (PDB:1AOR)	aldehyde:ferredoxin oxidoreductase [EC:1.2.7.5]	Aldehyde ferredoxin oxidoreductase, domains 2 & 3	237	511	401	0	0	0	0	0	135.043	291.168	228.49	0	0	0	0	0	0.114496	-0.118943	-0.0563134	-0.536835	-0.525103	-0.511334	-0.520472	-0.503873
1789	Potential alkyl-CoM to acyl-CoA conversion	Aldehyde:ferredoxin reductase	aor	ydhV	Aldehyde:ferredoxin oxidoreductase (YdhV) (PDB:1AOR)	aldehyde:ferredoxin oxidoreductase [EC:1.2.7.5]	Aldehyde ferredoxin oxidoreductase, domains 2 & 3	406	667	528	1	0	0	0	0	211.789	347.939	275.43	0.521648	0	0	0	0	0.309548	-0.0416822	0.024701	-0.0980588	-0.563448	-0.549679	-0.558817	-0.542218

## Sheet:  MAG 1 (A. liquidiphilum
Alkane oxidation and electron transfer								Raw fragments								Fragments per kilobase (FPK)								Centered log ratio (CLR)
gene_callers_id	pathway_part	protein	protein_abbreviation	specific_gene	COG20_function	KOfam_function	Pfam_function	pentane	hexane	heptane	octane	nonane	decane	dodecane	tetradecane	pentane	hexane	heptane	octane	nonane	decane	dodecane	tetradecane	pentane	hexane	heptane	octane	nonane	decane	dodecane	tetradecane
1018	Alkane activation	Alkyl-coenzyme M reductase	acr	acrB	Methyl coenzyme M reductase, beta subunit (McorB) (PDB:5N28)	methyl-coenzyme M reductase beta subunit [EC:2.8.4.1]	Methyl-coenzyme M reductase beta subunit, C-terminal domain	0	85	6	195	310	268	289	220	0	64.1026	4.52489	147.059	233.786	202.112	217.949	165.913	-0.508523	0.106754	0.277935	0.0222019	0.12218	0.554196	0.39782	0.382149
1019	Alkane activation	Alkyl-coenzyme M reductase	acr	acrA	Methyl coenzyme M reductase, alpha subunit (McorA) (PDB:1E6V)	methyl-coenzyme M reductase alpha subunit [EC:2.8.4.1]	Methyl-coenzyme M reductase alpha subunit, C-terminal domain	31	67	1	189	187	213	253	206	18.6186	40.2402	0.600601	113.514	112.312	127.928	151.952	123.724	1.19195	-0.0947787	-0.457758	-0.0902064	-0.195751	0.355779	0.241278	0.25479
1020	Alkane activation	Alkyl-coenzyme M reductase	acr	acrG	Methyl coenzyme M reductase, gamma subunit (McorG) (PDB:5N1Q)	methyl-coenzyme M reductase gamma subunit [EC:2.8.4.1]	Methyl-coenzyme M reductase gamma subunit	0	29	1	81	76	80	109	120	0	37.037	1.27714	103.448	97.0626	102.171	139.208	153.257	-0.279741	-0.126608	-0.130105	-0.129006	-0.257438	0.25983	0.204367	0.348509
1178	Alkane activation	Alkyl-coenzyme M reductase	acr	acrA	Methyl coenzyme M reductase, alpha subunit (McorA) (PDB:1E6V)		Methyl-coenzyme M reductase alpha subunit, C-terminal domain	104	1035	26	4010	4205	5613	11452	11765	54.5073	542.453	13.6268	2101.68	2203.88	2941.82	6002.1	6166.14	1.65359	1.0319	0.730233	1.17622	1.0959	1.71645	1.83704	1.95132
1208	Alkane activation	Alkyl-coenzyme M reductase	acr	acrC	Uncharacterized conserved protein related to methyl-CoM reductase subunit C, methanogenesis marker protein 7		Methyl-coenzyme M reductase operon protein C	0	40	0	135	170	101	102	79	0	43.7158	0	147.541	185.792	110.383	111.475	86.3388	-0.347401	-0.0566343	-0.674886	0.0241168	0.0229654	0.29284	0.108017	0.10023
1253	Alkane activation	Alkyl-coenzyme M reductase	acr	acrA	Methyl coenzyme M reductase, alpha subunit (McorA) (PDB:1E6V)		Methyl-coenzyme M reductase alpha subunit, N-terminal domain	0	14	0	40	54	26	66	39	0	48.11	0	137.457	185.567	89.3471	226.804	134.021	0.150128	-0.00519322	-0.177358	-0.00283933	0.0251656	0.207148	0.417643	0.293988
1375	Alkane activation	Alkyl-coenzyme M reductase	acr	acrA	Methyl coenzyme M reductase, alpha subunit (McorA) (PDB:1E6V)		Methyl-coenzyme M reductase alpha subunit, C-terminal domain	0	186	16	894	852	624	1218	957	0	122.047	10.4987	586.614	559.055	409.449	799.213	627.953	-0.568964	0.385026	0.622064	0.622194	0.500372	0.860343	0.961555	0.959438
1393	Alkane activation	Alkyl-coenzyme M reductase	acr	acrB	Methyl coenzyme M reductase, beta subunit (McorB) (PDB:5N28)	methyl-coenzyme M reductase beta subunit [EC:2.8.4.1]	Methyl-coenzyme M reductase beta subunit, C-terminal domain	6	272	10	1167	1480	1416	2003	1611	4.34783	197.101	7.24638	845.652	1072.46	1026.09	1451.45	1167.39	0.588085	0.592819	0.468875	0.780976	0.783191	1.25913	1.22062	1.22863
1394	Alkane activation	Alkyl-coenzyme M reductase	acr	acrG	Methyl coenzyme M reductase, gamma subunit (McorG) (PDB:5N1Q)	methyl-coenzyme M reductase gamma subunit [EC:2.8.4.1]	Methyl-coenzyme M reductase gamma subunit	324	217	4	808	899	754	1530	1120	360	241.111	4.44444	897.778	998.889	837.778	1700	1244.44	2.47202	0.680549	0.286535	0.807036	0.752421	1.17121	1.28931	1.25645
1406	Alkane activation	Alkyl-coenzyme M reductase	acr	acrC	Methyl coenzyme M reductase, subunit C (McorC)	methyl-coenzyme M reductase subunit C		0	31	1	121	113	73	201	113	0	49.2063	1.5873	192.063	179.365	115.873	319.048	179.365	-0.18532	-0.00369822	-0.0356841	0.138834	0.00831741	0.314742	0.563649	0.416939
1546	Alkane activation	Alkyl-coenzyme M reductase	acr	acrD	Methyl coenzyme M reductase, subunit D (McorD)		Methyl-coenzyme M reductase operon protein D	0	48	0	163	143	118	128	110	0	123.077	0	417.949	366.667	302.564	328.205	282.051	0.022956	0.392009	-0.304529	0.476052	0.318449	0.730449	0.576553	0.613581
1694	Alkane activation	Alkyl-coenzyme M reductase	acr	acrB	Methyl coenzyme M reductase, beta subunit (McorB) (PDB:5N28)	methyl-coenzyme M reductase beta subunit [EC:2.8.4.1]	Methyl-coenzyme M reductase beta subunit, C-terminal domain	0	59	2	284	290	371	546	325	0	42.5685	1.443	204.906	209.235	267.677	393.939	234.488	-0.527743	-0.0699145	-0.156258	0.165918	0.074045	0.675991	0.654542	0.532071
1695	Alkane activation	Alkyl-coenzyme M reductase	acr	acrG	Methyl coenzyme M reductase, gamma subunit (McorG) (PDB:5N1Q)	methyl-coenzyme M reductase gamma subunit [EC:2.8.4.1]	Methyl-coenzyme M reductase gamma subunit	0	63	0	333	309	302	558	422	0	81.3953	0	430.233	399.225	390.181	720.93	545.22	-0.27472	0.211365	-0.602206	0.487954	0.354582	0.83978	0.916997	0.898369
1696	Alkane activation	Alkyl-coenzyme M reductase	acr	acrA	Methyl coenzyme M reductase, alpha subunit (McorA) (PDB:1E6V)		Methyl-coenzyme M reductase alpha subunit, N-terminal domain	0	16	1	100	101	96	190	129	0	57.3477	3.58423	358.423	362.007	344.086	681.004	462.366	0.168416	0.0692115	0.318052	0.41016	0.313524	0.786719	0.893005	0.827949
129	Beta-oxidation	Acyl-CoA dehydrogenase	acad	caiA	Acyl-CoA dehydrogenase related to the alkylation response protein AidB (CaiA) (PDB:1BUC)	acyl-CoA dehydrogenase [EC:1.3.8.7]	Acyl-CoA dehydrogenase, C-terminal domain	0	67	2	258	234	200	387	228	0	42.218	1.26024	162.571	147.448	126.024	243.856	143.667	-0.586556	-0.0739414	-0.215072	0.0654823	-0.077772	0.349333	0.446409	0.319593
235	Beta-oxidation	Acyl-CoA dehydrogenase	acad	caiA	Acyl-CoA dehydrogenase related to the alkylation response protein AidB (CaiA) (PDB:1BUC)	acyl-CoA dehydrogenase [EC:1.3.8.7]	Acyl-CoA dehydrogenase, C-terminal domain	0	147	5	654	649	401	796	542	0	95.3307	3.24254	424.125	420.882	260.052	516.213	351.492	-0.574064	0.278039	0.139843	0.481424	0.377157	0.663397	0.771816	0.707599
343	Beta-oxidation	Acyl-CoA dehydrogenase	acad	caiA	Acyl-CoA dehydrogenase related to the alkylation response protein AidB (CaiA) (PDB:1BUC)	acyl-CoA dehydrogenase [EC:1.3.8.7]	Acyl-CoA dehydrogenase, C-terminal domain	0	68	1	124	127	52	79	69	0	58.8745	0.865801	107.359	109.957	45.0216	68.3983	59.7403	-0.448561	0.0704404	-0.298926	-0.113814	-0.20441	-0.0946272	-0.1035	-0.0593135
405	Beta-oxidation	Acyl-CoA dehydrogenase	acad	caiA	Acyl-CoA dehydrogenase related to the alkylation response protein AidB (CaiA) (PDB:1BUC)	acyl-CoA dehydrogenase [EC:1.3.8.7]	Acyl-CoA dehydrogenase, C-terminal domain	0	57	1	235	231	134	206	168	0	49.8688	0.874891	205.599	202.1	117.235	180.227	146.982	-0.444026	-0.00104661	-0.29439	0.167543	0.0591669	0.318472	0.315588	0.329837
505	Beta-oxidation	Acyl-CoA dehydrogenase	acad	caiA	Acyl-CoA dehydrogenase related to the alkylation response protein AidB (CaiA) (PDB:1BUC)	acyl-CoA dehydrogenase [EC:1.3.8.7]	Acyl-CoA dehydrogenase, C-terminal domain	15	284	9	2426	2387	1111	2161	1575	13.1234	248.469	7.87402	2122.48	2088.36	972.003	1890.64	1377.95	1.04734	0.693368	0.507243	1.18053	1.07256	1.23566	1.33542	1.30066
617	Beta-oxidation	Acyl-CoA dehydrogenase	acad	caiA	Acyl-CoA dehydrogenase related to the alkylation response protein AidB (CaiA) (PDB:1BUC)	acyl-CoA dehydrogenase [EC:1.3.8.7]	Acyl-CoA dehydrogenase, C-terminal domain	0	74	5	234	326	296	257	396	0	64.4038	4.35161	203.655	283.725	257.615	223.673	344.648	-0.446299	0.109168	0.267608	0.163421	0.206225	0.6595	0.409172	0.699207
668	Beta-oxidation	Acyl-CoA dehydrogenase	acad	caiA	Acyl-CoA dehydrogenase related to the alkylation response protein AidB (CaiA) (PDB:1BUC)	acyl-CoA dehydrogenase [EC:1.3.8.7]	Acyl-CoA dehydrogenase, C-terminal domain	0	55	1	146	173	63	123	68	0	47.373	0.861326	125.754	149.009	54.2636	105.943	58.5702	-0.450812	-0.0232075	-0.301176	-0.045396	-0.0728706	-0.014263	0.0855494	-0.0678579
837	Beta-oxidation	Acyl-CoA dehydrogenase	acad	caiA	Acyl-CoA dehydrogenase related to the alkylation response protein AidB (CaiA) (PDB:1BUC)	acyl-CoA dehydrogenase [EC:1.3.8.7]	Acyl-CoA dehydrogenase, C-terminal domain	0	56	2	428	285	690	1730	1003	0	49.2524	1.75901	376.429	250.66	606.86	1521.55	882.146	-0.44174	-0.00638025	-0.0702553	0.429789	0.152508	1.0312	1.24113	1.10704
1237	Beta-oxidation	Acyl-CoA dehydrogenase	acad	caiA	Acyl-CoA dehydrogenase related to the alkylation response protein AidB (CaiA) (PDB:1BUC)	acyl-CoA dehydrogenase [EC:1.3.8.7]	Acyl-CoA dehydrogenase, C-terminal domain	0	59	1	115	152	52	73	54	0	50.4274	0.854701	98.2906	129.915	44.4444	62.3932	46.1538	-0.454165	0.00366288	-0.304529	-0.152005	-0.132254	-0.100231	-0.143184	-0.170506
457	Beta-oxidation	Enoyl-CoA hydratase	ech	caiD	Enoyl-CoA hydratase/carnithine racemase (CaiD) (PDB:1DCI)		Enoyl-CoA hydratase/isomerase	0	22	4	59	102	25	47	49	0	39.6396	7.20721	106.306	183.784	45.045	84.6847	88.2883	-0.130272	-0.0947787	0.496485	-0.116177	0.019093	-0.0899573	-0.0088847	0.111596
1346	Beta-oxidation	Enoyl-CoA hydratase	ech	caiD	Enoyl-CoA hydratase/carnithine racemase (CaiD) (PDB:1DCI)	enoyl-CoA hydratase [EC:4.2.1.17]	Enoyl-CoA hydratase/isomerase	0	46	2	87	91	48	71	81	0	58.3016	2.53485	110.266	115.336	60.8365	89.9873	102.662	-0.283056	0.0677077	0.0884281	-0.10147	-0.182994	0.0364603	0.0159437	0.175364
1495	Beta-oxidation	Enoyl-CoA hydratase	ech	caiD	Enoyl-CoA hydratase/carnithine racemase (CaiD) (PDB:1DCI)	enoyl-CoA hydratase [EC:4.2.1.17]	Enoyl-CoA hydratase/isomerase	0	69	2	594	488	346	786	701	0	87.4525	2.53485	752.852	618.504	438.53	996.198	888.466	-0.283056	0.24224	0.0884281	0.730673	0.54445	0.890422	1.05734	1.11023
1643	Beta-oxidation	Enoyl-CoA hydratase	ech	caiD	Enoyl-CoA hydratase/carnithine racemase (CaiD) (PDB:1DCI)	enoyl-CoA hydratase [EC:4.2.1.17]	Enoyl-CoA hydratase/isomerase	0	28	1	71	106	57	79	51	0	35.6234	1.27226	90.3308	134.86	72.5191	100.509	64.8855	-0.281402	-0.143246	-0.131766	-0.187518	-0.115411	0.112041	0.0636593	-0.0223316
1691	Beta-oxidation	Enoyl-CoA hydratase	ech	caiD	Enoyl-CoA hydratase/carnithine racemase (CaiD) (PDB:1DCI)	enoyl-CoA hydratase [EC:4.2.1.17]	Enoyl-CoA hydratase/isomerase	0	28	1	92	62	25	64	36	0	35.0877	1.25313	115.288	77.6942	31.3283	80.2005	45.1128	-0.287982	-0.149826	-0.138346	-0.0822625	-0.353461	-0.247667	-0.0337285	-0.178426
132	Beta-oxidation	Hydroxyacyl-CoA dehydrogenase	hadh		Dihydrolipoamide dehydrogenase (E3) component of pyruvate/2-oxoglutarate dehydrogenase complex or glutathione oxidoreductase (Lpd) (PDB:6QKG)!!!2,4-dienoyl-CoA reductase or related NADH-dependent reductase, Old Yellow Enzyme (OYE) family (FadH) (PDB:1BWK)	2,4-dienoyl-CoA reductase (NADPH2) [EC:1.3.1.34]	3-hydroxyacyl-CoA dehydrogenase, NAD binding domain	0	104	4	357	376	174	294	233	0	51.7413	1.99005	177.612	187.065	86.5672	146.269	115.92	-0.689175	0.013252	-0.0624184	0.103679	0.025231	0.186395	0.224604	0.226375
177	Beta-oxidation	Hydroxyacyl-CoA dehydrogenase	hadh	fadB	Enoyl-CoA hydratase/carnithine racemase (CaiD) (PDB:1DCI)!!!3-hydroxyacyl-CoA dehydrogenase (FadB) (PDB:5ZQZ)	enoyl-CoA hydratase / 3-hydroxyacyl-CoA dehydrogenase [EC:4.2.1.17 1.1.1.35]	3-hydroxyacyl-CoA dehydrogenase, C-terminal domain	1	181	5	1061	925	748	1538	926	0.831255	150.457	4.15628	881.962	768.911	621.779	1278.47	769.742	0.0108762	0.475943	0.247662	0.799253	0.638773	1.04172	1.16555	1.04786
456	Beta-oxidation	Hydroxyacyl-CoA dehydrogenase	hadh	fadB	3-hydroxyacyl-CoA dehydrogenase (FadB) (PDB:5ZQZ)	3-hydroxybutyryl-CoA dehydrogenase [EC:1.1.1.157]	3-hydroxyacyl-CoA dehydrogenase, C-terminal domain	6	59	3	101	167	44	66	67	6.66667	65.5556	3.33333	112.222	185.556	48.8889	73.3333	74.4444	0.773721	0.117606	0.177391	-0.0941778	0.0224344	-0.058087	-0.0727062	0.036345
1452	Beta-oxidation	Hydroxyacyl-CoA dehydrogenase	hadh	fadB	3-hydroxyacyl-CoA dehydrogenase (FadB) (PDB:5ZQZ)	3-hydroxyacyl-CoA dehydrogenase [EC:1.1.1.35]	3-hydroxyacyl-CoA dehydrogenase, C-terminal domain	0	19	1	73	78	27	34	38	0	127.315	3.47222	567.13	421.296	307.87	740.741	491.898	-0.322493	0.40418	0.195119	0.607724	0.377846	0.736979	0.92872	0.85367
1870	Beta-oxidation	Hydroxyacyl-CoA dehydrogenase	hadh		NADPH-dependent glutamate synthase beta chain or related oxidoreductase (GltD) (PDB:1H7X)!!!Heterodisulfide reductase, subunit A (polyferredoxin) (HdrA) (PDB:5ODC)		3-hydroxyacyl-CoA dehydrogenase, NAD binding domain	39	81	3	197	398	62	79	67	26.971	56.0166	2.07469	136.238	275.242	42.8769	54.6335	46.3347	1.35148	0.0483211	-0.0285351	-0.0110026	0.192922	-0.116493	-0.201086	-0.169581
267	Beta-oxidation	Acetyl-CoA acetyltransferase	acat	paaJ	Acetyl-CoA acetyltransferase (PaaJ) (PDB:1AFW)	acetyl-CoA C-acetyltransferase [EC:2.3.1.9]	Beta-ketoacyl synthase, N-terminal domain	0	70	1	160	169	133	200	148	0	59.8291	0.854701	136.752	144.444	113.675	170.94	126.496	-0.454165	0.077335	-0.304529	-0.00911219	-0.0863541	0.305091	0.292643	0.264824
479	Beta-oxidation	Acetyl-CoA acetyltransferase	acat	paaJ	Acetyl-CoA acetyltransferase (PaaJ) (PDB:1AFW)	acetyl-CoA C-acetyltransferase [EC:2.3.1.9]	Beta-ketoacyl synthase, N-terminal domain	0	40	1	87	136	78	77	78	0	33.3333	0.833333	72.5	113.333	65	64.1667	65	-0.465161	-0.174394	-0.315525	-0.283575	-0.191386	0.0634839	-0.131165	-0.0230279
863	Beta-oxidation	Acetyl-CoA acetyltransferase	acat	paaJ	Acetyl-CoA acetyltransferase (PaaJ) (PDB:1AFW)	acetyl-CoA C-acetyltransferase [EC:2.3.1.9]	Thiolase, C-terminal domain	0	49	1	118	116	39	66	59	0	42.205	0.861326	101.637	99.9139	33.5917	56.8475	50.8183	-0.450812	-0.0728952	-0.301176	-0.137515	-0.245844	-0.22044	-0.183296	-0.129032
1264	Beta-oxidation	Acetyl-CoA acetyltransferase	acat	paaJ	Acetyl-CoA acetyltransferase (PaaJ) (PDB:1AFW)	acetyl-CoA C-acetyltransferase [EC:2.3.1.9]	Beta-ketoacyl synthase, N-terminal domain	0	56	2	311	269	163	332	207	0	46.2046	1.65017	256.601	221.947	134.488	273.927	170.792	-0.469482	-0.0341224	-0.0979975	0.263554	0.0997182	0.377811	0.497004	0.394799
1493	Beta-oxidation	Acetyl-CoA acetyltransferase	acat	paaJ	Acetyl-CoA acetyltransferase (PaaJ) (PDB:1AFW)	acetyl-CoA C-acetyltransferase [EC:2.3.1.9]	Beta-ketoacyl synthase, N-terminal domain	0	58	4	930	629	507	1038	628	0	48.6986	3.35852	780.856	528.128	425.693	871.537	527.288	-0.461891	-0.0114241	0.164866	0.746403	0.475746	0.87732	0.999209	0.883677
1757	Beta-oxidation	Acetyl-CoA acetyltransferase	acat	paaJ	Acetyl-CoA acetyltransferase (PaaJ) (PDB:1AFW)	acetyl-CoA C-acetyltransferase [EC:2.3.1.9]	Beta-ketoacyl synthase, N-terminal domain	0	126	6	817	734	457	1045	821	0	104.478	4.97512	677.446	608.624	378.939	866.501	680.763	-0.467327	0.318075	0.319131	0.684739	0.537307	0.826839	0.996691	0.994544
1890	Beta-oxidation	Acetyl-CoA acetyltransferase	acat	paaJ	Acetyl-CoA acetyltransferase (PaaJ) (PDB:1AFW)		Thiolase, C-terminal domain	0	63	2	124	115	32	68	50	0	54.4041	1.72712	107.081	99.3092	27.6339	58.7219	43.1779	-0.449688	0.0363969	-0.0782034	-0.114941	-0.248464	-0.30403	-0.169303	-0.199133
340	Beta-oxidation	Methylmalonyl-CoA mutase	mcm	sbm	Methylmalonyl-CoA mutase, N-terminal domain/subunit (Sbm) (PDB:6OXC)	methylmalonyl-CoA mutase, N-terminal domain [EC:5.4.99.2]	Methylmalonyl-CoA mutase	0	130	4	576	442	209	820	382	0	76.157	2.34329	337.434	258.934	122.437	480.375	223.784	-0.618213	0.180709	0.00854414	0.382164	0.166342	0.336746	0.74056	0.511682
779	Beta-oxidation	Methylmalonyl-CoA mutase	mcm	sbm	Methylmalonyl-CoA mutase, C-terminal domain/subunit (cobalamin-binding) (Sbm) (PDB:1B1A)	methylmalonyl-CoA mutase, C-terminal domain [EC:5.4.99.2]	B12 binding domain	0	22	0	83	98	51	70	50	0	53.528	0	201.946	238.443	124.088	170.316	121.655	0.00017875	0.0356725	-0.327307	0.161443	0.132257	0.345761	0.293062	0.250733
427	Wood-Ljungdahl	Acetyl-CoA decarbonylase/synthase	acds	cooc	CO dehydrogenase nickel-insertion accessory protein CooC1 (CooC) (PUBMED:15466042)	CO dehydrogenase maturation factor	AAA domain	0	65	2	134	143	59	88	85	0	83.014	2.55428	171.137	182.631	75.3512	112.388	108.557	-0.279741	0.219811	0.0917434	0.0885592	0.0157522	0.128551	0.111896	0.199488
648	Wood-Ljungdahl	Acetyl-CoA decarbonylase/synthase	acds	cdhE	CO dehydrogenase/acetyl-CoA synthase gamma subunit (corrinoid Fe-S protein) (CdhE) (PDB:2H9A)	acetyl-CoA decarbonylase/synthase, CODH/ACS complex subunit gamma [EC:2.1.1.245]	CO dehydrogenase/acetyl-CoA synthase delta subunit	0	140	6	737	743	526	840	561	0	97.8337	4.19287	515.024	519.217	367.575	587.002	392.034	-0.541619	0.289368	0.244839	0.565721	0.468303	0.813554	0.827613	0.754994
649	Wood-Ljungdahl	Acetyl-CoA decarbonylase/synthase	acds	cdhD	CO dehydrogenase/acetyl-CoA synthase delta subunit (corrinoid Fe-S protein) (CdhD)	acetyl-CoA decarbonylase/synthase, CODH/ACS complex subunit delta [EC:2.1.1.245]	CO dehydrogenase/acetyl-CoA synthase delta subunit	1	144	3	887	805	647	1026	711	0.661376	95.2381	1.98413	586.64	532.407	427.91	678.571	470.238	-0.08841	0.277648	-0.0479186	0.622215	0.479176	0.879484	0.890522	0.833907
651	Wood-Ljungdahl	Acetyl-CoA decarbonylase/synthase	acds	cdhc	CO dehydrogenase/acetyl-CoA synthase beta subunit (CdhC)		ACS/CODH beta subunit C-terminal	0	230	9	1387	1319	1140	1822	1297	0	152.722	5.9761	920.983	875.83	756.972	1209.83	861.222	-0.563804	0.482178	0.387464	0.818007	0.695247	1.12707	1.14156	1.09657
652	Wood-Ljungdahl	Acetyl-CoA decarbonylase/synthase	acds	cdhB	CO dehydrogenase/acetyl-CoA synthase epsilon subunit (CdhB) (PDB:1YTL)	anaerobic carbon-monoxide dehydrogenase, CODH/ACS complex subunit epsilon	CO dehydrogenase beta subunit/acetyl-CoA synthase epsilon subunit	5	41	0	208	181	156	198	108	9.4162	77.2128	0	391.714	340.866	293.785	372.881	203.39	0.930319	0.190285	-0.438559	0.44761	0.286444	0.717215	0.631381	0.471619
653	Wood-Ljungdahl	Acetyl-CoA decarbonylase/synthase	acds	cdhA	CO dehydrogenase/acetyl-CoA synthase alpha subunit (CdhA) (PDB:3CF4)	anaerobic carbon-monoxide dehydrogenase, CODH/ACS complex subunit alpha [EC:1.2.7.4]	4Fe-4S binding domain	0	211	6	1454	1133	966	1343	713	0	87.4793	2.48756	602.819	469.735	400.498	556.799	295.605	-0.768357	0.240265	0.0181012	0.633935	0.424706	0.85062	0.804575	0.6323
718	Wood-Ljungdahl	Acetyl-CoA decarbonylase/synthase	acds	cooc	CO dehydrogenase nickel-insertion accessory protein CooC1 (CooC) (PUBMED:15466042)	CO dehydrogenase maturation factor	AAA domain	0	39	1	89	88	37	62	49	0	51.7928	1.32802	118.194	116.866	49.1368	82.3373	65.073	-0.262774	0.0171339	-0.113139	-0.0713733	-0.17719	-0.0549682	-0.0222003	-0.0209061
916	Wood-Ljungdahl	Acetyl-CoA decarbonylase/synthase	acds	cooT		uncharacterized protein	CO dehydrogenase accessory protein CooT	0	5	1	21	35	16	18	10	0	26.455	5.29101	111.111	185.185	84.6561	95.2381	52.9101	0.337559	-0.238767	0.487195	-0.0904247	0.0264286	0.188818	0.0494246	-0.0939888
1260	Wood-Ljungdahl	Acetyl-CoA decarbonylase/synthase	acds	cdhA	CO dehydrogenase/acetyl-CoA synthase alpha subunit (CdhA) (PDB:3CF4)	anaerobic carbon-monoxide dehydrogenase, CODH/ACS complex subunit alpha [EC:1.2.7.4]	4Fe-4S dicluster domain	14	209	6	1155	1277	679	1253	734	5.53578	82.6414	2.37248	456.702	504.943	268.486	495.453	290.233	0.67347	0.215567	-0.00247033	0.51342	0.456074	0.677036	0.75389	0.624327
1262	Wood-Ljungdahl	Acetyl-CoA decarbonylase/synthase	acds	cdhc	CO dehydrogenase/acetyl-CoA synthase beta subunit (CdhC)		ACS/CODH beta subunit C-terminal	5	112	3	627	565	380	809	413	3.42936	76.8176	2.05761	430.041	387.517	260.631	554.87	283.265	0.491656	0.184727	-0.0321243	0.487455	0.341337	0.664393	0.803174	0.614002
1302	Wood-Ljungdahl	Acetyl-CoA decarbonylase/synthase	acds	cooc	CO dehydrogenase nickel-insertion accessory protein CooC1 (CooC) (PUBMED:15466042)	CO dehydrogenase maturation factor	Adenylylsulphate kinase	0	38	1	98	127	59	97	67	0	50.6667	1.33333	130.667	169.333	78.6667	129.333	89.3333	-0.261041	0.00773124	-0.111405	-0.0280264	-0.016889	0.147251	0.172658	0.115526
1431	Wood-Ljungdahl	Acetyl-CoA decarbonylase/synthase	acds	cdhE	CO dehydrogenase/acetyl-CoA synthase gamma subunit (corrinoid Fe-S protein) (CdhE) (PDB:2H9A)	acetyl-CoA decarbonylase/synthase, CODH/ACS complex subunit gamma [EC:2.1.1.245]	CO dehydrogenase/acetyl-CoA synthase delta subunit	0	130	3	611	523	232	621	334	0	91.2281	2.10526	428.772	367.018	162.807	435.789	234.386	-0.539794	0.259127	-0.0221817	0.48618	0.317764	0.460404	0.698341	0.531865
1432	Wood-Ljungdahl	Acetyl-CoA decarbonylase/synthase	acds	cdhD	CO dehydrogenase/acetyl-CoA synthase delta subunit (corrinoid Fe-S protein) (CdhD)	acetyl-CoA decarbonylase/synthase, CODH/ACS complex subunit delta [EC:2.1.1.245]	CO dehydrogenase/acetyl-CoA synthase delta subunit	0	134	4	745	546	334	693	374	0	96.2644	2.87356	535.201	392.241	239.943	497.845	268.678	-0.529619	0.282415	0.0971384	0.582407	0.346613	0.628552	0.756122	0.591096
1434	Wood-Ljungdahl	Acetyl-CoA decarbonylase/synthase	acds	cooc	CO dehydrogenase nickel-insertion accessory protein CooC1 (CooC) (PUBMED:15466042)	CO dehydrogenase maturation factor	AAA domain	0	39	1	273	244	160	265	147	0	51.7928	1.32802	362.55	324.037	212.483	351.926	195.219	-0.262774	0.0171339	-0.113139	0.413761	0.264146	0.576476	0.605984	0.453281
1435	Wood-Ljungdahl	Acetyl-CoA decarbonylase/synthase	acds	cdhc	CO dehydrogenase/acetyl-CoA synthase beta subunit (CdhC)	acetyl-CoA decarbonylase/synthase, CODH/ACS complex subunit beta [EC:2.3.1.169]	ACS/CODH beta subunit C-terminal	0	201	3	1128	1012	612	1165	692	0	134.269	2.00401	753.507	676.019	408.818	778.223	462.258	-0.561201	0.426385	-0.0435886	0.730878	0.582835	0.85968	0.950005	0.826482
1436	Wood-Ljungdahl	Acetyl-CoA decarbonylase/synthase	acds	cdhB	CO dehydrogenase/acetyl-CoA synthase epsilon subunit (CdhB) (PDB:1YTL)	anaerobic carbon-monoxide dehydrogenase, CODH/ACS complex subunit epsilon	CO dehydrogenase beta subunit/acetyl-CoA synthase epsilon subunit	0	58	1	261	201	133	269	107	0	107.407	1.85185	483.333	372.222	246.296	498.148	198.148	-0.118373	0.332094	0.0312626	0.538677	0.324543	0.640883	0.75688	0.460298
1437	Wood-Ljungdahl	Acetyl-CoA decarbonylase/synthase	acds	cdhA	CO dehydrogenase/acetyl-CoA synthase alpha subunit (CdhA) (PDB:3CF4)	anaerobic carbon-monoxide dehydrogenase, CODH/ACS complex subunit alpha [EC:1.2.7.4]	4Fe-4S dicluster domain	0	163	1	1242	960	593	1135	524	0	67.0782	0.411523	511.111	395.062	244.033	467.078	215.638	-0.771586	0.125243	-0.62195	0.562289	0.349553	0.63561	0.728296	0.495423
1641	Wood-Ljungdahl	Acetyl-CoA decarbonylase/synthase	acds	cdhE	Pyruvate:ferredoxin oxidoreductase or related 2-oxoacid:ferredoxin oxidoreductase, delta subunit (PorD) (PDB:5C4I)!!!CO dehydrogenase/acetyl-CoA synthase gamma subunit (corrinoid Fe-S protein) (CdhE) (PDB:2H9A)	4Fe-4S ferredoxin	4Fe-4S binding domain	0	25	0	70	81	13	50	40	0	58.6854	0	164.319	190.141	30.5164	117.371	93.8967	-0.015389	0.0744624	-0.342874	0.0723782	0.0344101	-0.25128	0.132596	0.139329
1672	Wood-Ljungdahl	Acetyl-CoA decarbonylase/synthase	acds	cdhA	CO dehydrogenase/acetyl-CoA synthase alpha subunit (CdhA) (PDB:3CF4)	anaerobic carbon-monoxide dehydrogenase, CODH/ACS complex subunit alpha [EC:1.2.7.4]	Prismane/CO dehydrogenase family	0	125	1	270	341	257	333	309	0	49.1352	0.393082	106.132	134.041	101.022	130.896	121.462	-0.791497	-0.00954161	-0.641861	-0.119751	-0.119464	0.253056	0.176293	0.246427
1673	Wood-Ljungdahl	Acetyl-CoA decarbonylase/synthase	acds				CO dehydrogenase beta subunit/acetyl-CoA synthase epsilon subunit	0	30	1	83	108	35	60	63	0	67.1141	2.23714	185.682	241.611	78.2998	134.228	140.94	-0.036287	0.131324	0.113349	0.124978	0.137784	0.147716	0.190163	0.31375
1674	Wood-Ljungdahl	Acetyl-CoA decarbonylase/synthase	acds	cdhc	CO dehydrogenase/acetyl-CoA synthase beta subunit (CdhC)		ACS/CODH beta subunit C-terminal	0	52	2	108	130	106	158	144	0	37.3563	1.43678	77.5862	93.3908	76.1494	113.506	103.448	-0.529619	-0.126148	-0.158134	-0.254611	-0.275367	0.131506	0.115105	0.177512
1677	Wood-Ljungdahl	Acetyl-CoA decarbonylase/synthase	acds	cooc	CO dehydrogenase nickel-insertion accessory protein CooC1 (CooC) (PUBMED:15466042)	CO dehydrogenase maturation factor	AAA domain	0	28	2	89	88	54	115	84	0	35.6234	2.54453	113.232	111.959	68.7023	146.31	106.87	-0.281402	-0.143246	0.0900826	-0.0900009	-0.195817	0.0887695	0.225874	0.192718
1824	Wood-Ljungdahl	Acetyl-CoA decarbonylase/synthase	acds	cdhE	CO dehydrogenase/acetyl-CoA synthase gamma subunit (corrinoid Fe-S protein) (CdhE) (PDB:2H9A)	4Fe-4S ferredoxin	4Fe-4S binding domain	0	39	1	186	117	66	144	140	0	83.3333	2.13675	397.436	250	141.026	307.692	299.145	-0.0562253	0.223683	0.0934106	0.454032	0.152454	0.400371	0.548337	0.638714
1168	Wood-Ljungdahl	5,10-methylene-tetrahydrofolate reductase	met	metF	5,10-methylenetetrahydrofolate reductase (MetF) (PDB:1B5T)!!!CO dehydrogenase/acetyl-CoA synthase delta subunit (corrinoid Fe-S protein) (CdhD)	methylenetetrahydrofolate reductase (NADPH) [EC:1.5.1.20]	Methylenetetrahydrofolate reductase	20	54	4	302	285	225	334	226	21.2314	57.3248	4.24628	320.594	302.548	238.854	354.565	239.915	1.25275	0.0596774	0.266727	0.360273	0.234217	0.626891	0.60906	0.542301
384	Wood-Ljungdahl	5,10-methylene-tetrahydromethanopterin reductase	mer		Flavin-dependent oxidoreductase, luciferase family (includes alkanesulfonate monooxygenase SsuD and methylene tetrahydromethanopterin reductase) (SsuD) (PDB:1BRL)	5,10-methylenetetrahydromethanopterin reductase [EC:1.5.98.2]	Luciferase-like monooxygenase	0	59	16	446	455	681	4335	5025	0	46.0578	12.4902	348.165	355.191	531.616	3384.07	3922.72	-0.493529	-0.0357004	0.6975	0.395871	0.303601	0.973712	1.5882	1.75491
612	Wood-Ljungdahl	5,10-methylene-tetrahydromethanopterin reductase	mer		Flavin-dependent oxidoreductase, luciferase family (includes alkanesulfonate monooxygenase SsuD and methylene tetrahydromethanopterin reductase) (SsuD) (PDB:1BRL)	5,10-methylenetetrahydromethanopterin reductase [EC:1.5.98.2]	Luciferase-like monooxygenase	0	55	0	90	136	27	46	29	0	52.2317	0	85.4701	129.155	25.641	43.6847	27.5404	-0.408408	0.0191964	-0.735893	-0.212181	-0.134634	-0.3353	-0.296261	-0.391323
253	Wood-Ljungdahl	Methylene-tetrahydromethanopterin dehydrogenase	mtd	mtd	F420-dependent methylenetetrahydromethanopterin dehydrogenase (Mtd) (PDB:1QV9)	methylenetetrahydromethanopterin dehydrogenase [EC:1.5.98.1]	methylene-5,6,7,8-tetrahydromethanopterin dehydrogenase	45	158	124	204	200	147	254	191	54.5455	191.515	150.303	247.273	242.424	178.182	307.879	231.515	1.65661	0.580907	1.76628	0.247838	0.138323	0.500134	0.547949	0.526999
560	Wood-Ljungdahl	Methenyl-tetrahydromethanopterin cyclohydrolase	mch	mch	Methenyltetrahydromethanopterin cyclohydrolase (Mch) (PDB:1QLM)	methenyltetrahydromethanopterin cyclohydrolase [EC:3.5.4.27]	Cyclohydrolase (MCH)	0	47	0	142	135	42	122	73	0	48.0573	0	145.194	138.037	42.9448	124.744	74.6421	-0.376318	-0.0163135	-0.703804	0.0170746	-0.105737	-0.114154	0.156512	0.0372322
473	Wood-Ljungdahl	Formylmethanofuran-tetrahydromethanopterin formyltransferase	ftr	ftr	Formylmethanofuran:tetrahydromethanopterin formyltransferase (Ftr) (PDB:1FTR)	formylmethanofuran--tetrahydromethanopterin N-formyltransferase [EC:2.3.1.101]	Formylmethanofuran-tetrahydromethanopterin formyltransferase	0	35	0	156	151	104	153	130	0	39.1499	0	174.497	168.904	116.331	171.141	145.414	-0.337317	-0.103777	-0.664802	0.0967755	-0.0182628	0.315574	0.293486	0.325557
1450	Wood-Ljungdahl	Formylmethanofuran-tetrahydromethanopterin formyltransferase	ftr	ftr	Formylmethanofuran:tetrahydromethanopterin formyltransferase (Ftr) (PDB:1FTR)	formylmethanofuran--tetrahydromethanopterin N-formyltransferase [EC:2.3.1.101]	Formylmethanofuran-tetrahydromethanopterin formyltransferase	0	42	2	119	169	36	68	59	0	46.8227	2.22965	132.664	188.406	40.1338	75.8082	65.7748	-0.338772	-0.0270717	0.0327127	-0.0218259	0.0290394	-0.142704	-0.0583872	-0.0169918
440	Wood-Ljungdahl	Formylmethanofuran dehydrogenase	fwd	fwdD	Formylmethanofuran dehydrogenase subunit D (FwdD) (PDB:2KI8)		Molydopterin dinucleotide binding domain	1	24	1	91	134	36	44	45	2.31481	55.5556	2.31481	210.648	310.185	83.3333	101.852	104.167	0.455658	0.0510141	0.128173	0.179536	0.245901	0.174605	0.0715909	0.183811
581	Wood-Ljungdahl	Formylmethanofuran dehydrogenase	fwd	fwdB	Formylmethanofuran dehydrogenase subunit B (FwdB) (PDB:5T5I)	formylmethanofuran dehydrogenase subunit B [EC:1.2.7.12]		0	65	2	196	227	108	160	161	0	50.9804	1.56863	153.725	178.039	84.7059	125.49	126.275	-0.49149	0.00806289	-0.120005	0.041451	0.00413332	0.177715	0.15868	0.263946
869	Wood-Ljungdahl	Formylmethanofuran dehydrogenase	fwd	fwdC	Formylmethanofuran dehydrogenase subunit C (FwdC) (PDB:5T5I)	formylmethanofuran dehydrogenase subunit C [EC:1.2.7.12]	GXGXG motif	0	82	0	414	400	187	392	288	0	104.725	0	528.736	510.856	238.825	500.639	367.816	-0.279741	0.320024	-0.607227	0.577361	0.461503	0.627035	0.758793	0.727668
870	Wood-Ljungdahl	Formylmethanofuran dehydrogenase	fwd	fwdA	Formylmethanofuran dehydrogenase subunit A (FwdA) (PDB:5T5I)	formylmethanofuran dehydrogenase subunit A [EC:1.2.7.12]	Amidohydrolase family	0	154	3	753	662	423	863	503	0	90.8555	1.76991	444.248	390.56	249.558	509.145	296.755	-0.615149	0.257091	-0.0975365	0.501512	0.344678	0.645479	0.765807	0.634113
871	Wood-Ljungdahl	Formylmethanofuran dehydrogenase	fwd	fwdB	Formylmethanofuran dehydrogenase subunit B (FwdB) (PDB:5T5I)	formylmethanofuran dehydrogenase subunit B [EC:1.2.7.12]	Molybdopterin oxidoreductase	0	83	3	570	478	294	641	305	0	62.453	2.25734	428.894	359.669	221.219	482.318	229.496	-0.509504	0.0954933	0.00810821	0.486329	0.309019	0.593356	0.742386	0.52277
872	Wood-Ljungdahl	Formylmethanofuran dehydrogenase	fwd	fwdD	Formylmethanofuran dehydrogenase subunit D (FwdD) (PDB:2KI8)	formylmethanofuran dehydrogenase subunit D [EC:1.2.7.12]	Molydopterin dinucleotide binding domain	0	24	1	210	226	84	158	98	0	63.4921	2.6455	555.556	597.884	222.222	417.989	259.259	0.0365288	0.109006	0.186165	0.599359	0.530239	0.59716	0.681252	0.577228
1230	Wood-Ljungdahl	Formylmethanofuran dehydrogenase	fwd	fwdE	Formylmethanofuran dehydrogenase subunit E (FwdE) (PDB:2GLZ)	formylmethanofuran dehydrogenase subunit E [EC:1.2.7.12]	FmdE, Molybdenum formylmethanofuran dehydrogenase operon	0	40	1	98	154	37	46	38	0	96.6184	2.41546	236.715	371.981	89.372	111.111	91.7874	-0.00297977	0.287786	0.146656	0.230035	0.32459	0.204826	0.109167	0.129744
1252	Wood-Ljungdahl	Formylmethanofuran dehydrogenase	fwd	fwdA	Formylmethanofuran dehydrogenase subunit A (FwdA) (PDB:5T5I)	formylmethanofuran dehydrogenase subunit A [EC:1.2.7.12]	Amidohydrolase family	14	122	37	160	146	69	76	67	9.48509	82.6558	25.0678	108.401	98.916	46.748	51.4905	45.393	0.907332	0.216382	0.99251	-0.110013	-0.250587	-0.079306	-0.22671	-0.178499
1373	Wood-Ljungdahl	Formylmethanofuran dehydrogenase	fwd	fwdE	Formylmethanofuran dehydrogenase subunit E (FwdE) (PDB:2GLZ)	formylmethanofuran dehydrogenase subunit E [EC:1.2.7.12]	FmdE, Molybdenum formylmethanofuran dehydrogenase operon	0	45	2	80	123	33	61	68	0	55.7621	2.47831	99.1326	152.416	40.8922	75.5886	84.2627	-0.292853	0.0484696	0.0786316	-0.147479	-0.0625445	-0.134033	-0.0592837	0.0901008
1702	Wood-Ljungdahl	Formylmethanofuran dehydrogenase	fwd	fwdB	Formylmethanofuran dehydrogenase subunit B (FwdB) (PDB:5T5I)	formylmethanofuran dehydrogenase subunit B [EC:1.2.7.12]		0	56	1	107	160	46	87	49	0	46.0905	0.823045	88.0658	131.687	37.8601	71.6049	40.3292	-0.470556	-0.0351961	-0.32092	-0.199569	-0.126439	-0.169328	-0.0838536	-0.228687
1984	Wood-Ljungdahl	Formylmethanofuran dehydrogenase	fwd	fwdB	Formylmethanofuran dehydrogenase subunit B (FwdB) (PDB:5T5I)			0	14	0	8	24	22	22	15	0	59.8291	0	34.188	102.564	94.0171	94.0171	64.1026	0.244805	0.0894839	-0.0826807	-0.586198	-0.227388	0.230762	0.0416813	-0.0176004
179	Cofactor recycling	Heterodisulfide reductase	hdr	hdrC	NAD(P)H-flavin reductase (Mcr1) (PDB:3A1F)!!!Heterodisulfide reductase, subunit C (HdrC) (PDB:5ODC)	sulfhydrogenase subunit beta (sulfur reductase) [EC:1.12.98.4]	4Fe-4S dicluster domain	1	63	2	130	167	48	62	74	1.25786	79.2453	2.51572	163.522	210.063	60.3774	77.9874	93.0818	0.190775	0.199738	0.085138	0.068842	0.0763098	0.0331701	-0.0457724	0.133073
275	Cofactor recycling	Heterodisulfide reductase	hdr	hdrD	Fe-S cluster-containing oxidoreductase, includes glycolate oxidase subunit GlcF (GlpC)	heterodisulfide reductase subunit D [EC:1.8.98.1]	Cysteine-rich domain	0	46	2	171	220	179	211	133	0	37.3984	1.62602	139.024	178.862	145.528	171.545	108.13	-0.475885	-0.12512	-0.1044	-0.00204235	0.00616558	0.411955	0.29412	0.19686
621	Cofactor recycling	Heterodisulfide reductase	hdr	hdrD	Fe-S cluster-containing oxidoreductase, includes glycolate oxidase subunit GlcF (GlpC)	heterodisulfide reductase subunit D [EC:1.8.98.1]	Cysteine-rich domain	0	54	1	243	319	202	239	199	0	48.7805	0.903342	219.512	288.166	182.475	215.899	179.765	-0.430127	-0.0104193	-0.280491	0.19595	0.212985	0.510073	0.393873	0.417079
623	Cofactor recycling	Heterodisulfide reductase	hdr	hdrA	Heterodisulfide reductase, subunit A (polyferredoxin) (HdrA) (PDB:5ODC)		FAD dependent oxidoreductase	0	93	4	429	423	295	518	417	0	69.8198	3.003	322.072	317.568	221.471	388.889	313.063	-0.510484	0.143639	0.116273	0.362058	0.255011	0.593849	0.648959	0.657436
624	Cofactor recycling	Heterodisulfide reductase	hdr	hdrA	Heterodisulfide reductase, subunit A (polyferredoxin) (HdrA) (PDB:5ODC)		Flavin containing amine oxidoreductase	0	103	2	296	305	264	349	227	0	59.8142	1.16144	171.893	177.12	153.31	202.671	131.823	-0.622013	0.076239	-0.250528	0.0895902	0.00164017	0.434188	0.366129	0.282232
854	Cofactor recycling	Heterodisulfide reductase	hdr	hdrA	Heterodisulfide reductase, subunit A (polyferredoxin) (HdrA) (PDB:5ODC)	heterodisulfide reductase subunit A2 [EC:1.8.7.3 1.8.98.4 1.8.98.5 1.8.98.6]	FAD dependent oxidoreductase	0	155	3	558	492	348	571	379	0	78.1644	1.51286	281.392	248.109	175.492	287.948	191.125	-0.683302	0.191739	-0.16569	0.303299	0.147746	0.492676	0.518408	0.443173
938	Cofactor recycling	Heterodisulfide reductase	hdr	hdrA	Fe-S-cluster-containing dehydrogenase component (DMSO reductase) (HybA) (PDB:2VPW)!!!Heterodisulfide reductase, subunit A (polyferredoxin) (HdrA) (PDB:5ODC)!!!Coenzyme F420-reducing hydrogenase, delta subunit (FrhD) (PDB:5ODC)	ferredoxin	4Fe-4S binding domain	753	2010	1097	547	882	191	253	213	358.571	957.143	522.381	260.476	420	90.9524	120.476	101.429	2.46991	1.27842	2.30575	0.269763	0.376158	0.207745	0.140473	0.168462
1159	Cofactor recycling	Heterodisulfide reductase	hdr	hdrC	Heterodisulfide reductase, subunit C (HdrC) (PDB:5ODC)	heterodisulfide reductase subunit C2 [EC:1.8.7.3 1.8.98.4 1.8.98.5 1.8.98.6]	4Fe-4S dicluster domain	0	40	0	137	118	42	91	51	0	73.2601	0	250.916	216.117	76.9231	166.667	93.4066	-0.123172	0.167594	-0.450657	0.254709	0.0891878	0.138992	0.282943	0.135898
1160	Cofactor recycling	Heterodisulfide reductase	hdr	hdrB	Heterodisulfide reductase, subunit B (HdrB) (PDB:5ODC)	heterodisulfide reductase subunit B2 [EC:1.8.7.3 1.8.98.4 1.8.98.5 1.8.98.6]	Cysteine-rich domain	0	61	2	147	190	49	88	65	0	69.6347	2.28311	167.808	216.895	55.9361	100.457	74.2009	-0.328484	0.143703	0.043001	0.0798865	0.090053	-0.000103387	0.0631538	0.0350209
1176	Cofactor recycling	Heterodisulfide reductase	hdr	hdrA	Heterodisulfide reductase, subunit A (polyferredoxin) (HdrA) (PDB:5ODC)!!!Coenzyme F420-reducing hydrogenase, delta subunit (FrhD) (PDB:5ODC)		4Fe-4S binding domain	0	43	2	186	230	149	166	210	0	44.1026	2.05128	190.769	235.897	152.821	170.256	215.385	-0.374984	-0.0531836	-0.00349946	0.135273	0.126328	0.433432	0.291124	0.495531
1239	Cofactor recycling	Heterodisulfide reductase	hdr	hdrA	Heterodisulfide reductase, subunit A (polyferredoxin) (HdrA) (PDB:5ODC)	heterodisulfide reductase subunit A2 [EC:1.8.7.3 1.8.98.4 1.8.98.5 1.8.98.6]	FAD binding domain	0	180	7	1034	757	468	1013	557	0	91.8836	3.57325	527.82	386.422	238.897	517.101	284.329	-0.678014	0.261775	0.170592	0.576295	0.34001	0.626471	0.772504	0.615494
1720	Cofactor recycling	Heterodisulfide reductase	hdr	hdrD	Fe-S cluster-containing oxidoreductase, includes glycolate oxidase subunit GlcF (GlpC)	heterodisulfide reductase subunit D [EC:1.8.98.1]	Cysteine-rich domain	0	130	5	238	392	96	160	133	0	118.397	4.55373	216.758	357.013	87.4317	145.719	121.129	-0.426582	0.37234	0.287325	0.190485	0.305899	0.19172	0.223587	0.246163
1723	Cofactor recycling	Heterodisulfide reductase	hdr	hdrC	Heterodisulfide reductase, subunit C (HdrC) (PDB:5ODC)	heterodisulfide reductase subunit C2 [EC:1.8.7.3 1.8.98.4 1.8.98.5 1.8.98.6]	4Fe-4S binding domain	0	6	0	85	97	38	63	56	0	10.1523	0	143.824	164.129	64.2978	106.599	94.7547	-0.157567	-0.661342	-0.485052	0.0139773	-0.0299208	0.0616688	0.0899009	0.141745
1724	Cofactor recycling	Heterodisulfide reductase	hdr	hdrB	Heterodisulfide reductase, subunit B (HdrB) (PDB:5ODC)	heterodisulfide reductase subunit B2 [EC:1.8.7.3 1.8.98.4 1.8.98.5 1.8.98.6]	Cysteine-rich domain	0	39	5	151	135	78	119	68	0	46.4286	5.95238	179.762	160.714	92.8571	141.667	80.9524	-0.310259	-0.0303504	0.403649	0.109732	-0.0396779	0.218386	0.211803	0.072695
1725	Cofactor recycling	Heterodisulfide reductase	hdr	hdrA	Heterodisulfide reductase, subunit A (polyferredoxin) (HdrA) (PDB:5ODC)		Alanine dehydrogenase/PNT, C-terminal domain	0	137	3	552	523	167	371	244	0	53.5994	1.17371	215.962	204.617	65.3365	145.149	95.4617	-0.79354	0.0280736	-0.275928	0.18837	0.0640179	0.0642495	0.221113	0.142002
1767	Cofactor recycling	Heterodisulfide reductase	hdr	hdrA	Heterodisulfide reductase, subunit A (polyferredoxin) (HdrA) (PDB:5ODC)	heterodisulfide reductase subunit A2 [EC:1.8.7.3 1.8.98.4 1.8.98.5 1.8.98.6]	Alanine dehydrogenase/PNT, C-terminal domain	0	154	2	514	524	247	461	354	0	49.6454	0.644745	165.7	168.923	79.626	148.614	114.12	-0.877621	-0.00538154	-0.506137	0.0733422	-0.0192342	0.149729	0.231245	0.219258
1770	Cofactor recycling	Heterodisulfide reductase	hdr	hdrA	NADPH-dependent glutamate synthase beta chain or related oxidoreductase (GltD) (PDB:1H7X)!!!Heterodisulfide reductase, subunit A (polyferredoxin) (HdrA) (PDB:5ODC)		4Fe-4S binding domain	0	232	4	566	1009	193	231	170	0	110.005	1.89663	268.374	478.426	91.5126	109.531	80.6069	-0.710056	0.339678	-0.0832989	0.282722	0.432692	0.2104	0.0991891	0.0689315
1870	Cofactor recycling	Heterodisulfide reductase	hdr	hdrA	NADPH-dependent glutamate synthase beta chain or related oxidoreductase (GltD) (PDB:1H7X)!!!Heterodisulfide reductase, subunit A (polyferredoxin) (HdrA) (PDB:5ODC)		3-hydroxyacyl-CoA dehydrogenase, NAD binding domain	39	81	3	197	398	62	79	67	26.971	56.0166	2.07469	136.238	275.242	42.8769	54.6335	46.3347	1.35148	0.0483211	-0.0285351	-0.0110026	0.192922	-0.116493	-0.201086	-0.169581
1158	Cofactor recycling	[FeS]-oxidoreductase	FeS-or		Fe-S cluster-containing oxidoreductase, includes glycolate oxidase subunit GlcF (GlpC)!!!Nitrate reductase gamma subunit (NarI) (PDB:1Y5L)	dimethylglycine catabolism B	Cysteine-rich domain	0	59	2	369	375	172	277	187	0	52.0282	1.76367	325.397	330.688	151.675	244.268	164.903	-0.440592	0.0172357	-0.0691079	0.3666	0.272659	0.429972	0.447365	0.379672
275	Cofactor recycling	[FeS]-oxidoreductase	FeS-or		Fe-S cluster-containing oxidoreductase, includes glycolate oxidase subunit GlcF (GlpC)	heterodisulfide reductase subunit D [EC:1.8.98.1]	Cysteine-rich domain	0	46	2	171	220	179	211	133	0	37.3984	1.62602	139.024	178.862	145.528	171.545	108.13	-0.475885	-0.12512	-0.1044	-0.00204235	0.00616558	0.411955	0.29412	0.19686
618	Cofactor recycling	[FeS]-oxidoreductase	FeS-or		Fe-S cluster-containing oxidoreductase, includes glycolate oxidase subunit GlcF (GlpC)		Cysteine-rich domain	0	32	0	29	78	14	19	14	0	67.9406	0	61.5711	165.605	29.724	40.3397	29.724	-0.0590003	0.136194	-0.386486	-0.3496	-0.0254892	-0.263857	-0.324272	-0.350369
621	Cofactor recycling	[FeS]-oxidoreductase	FeS-or		Fe-S cluster-containing oxidoreductase, includes glycolate oxidase subunit GlcF (GlpC)	heterodisulfide reductase subunit D [EC:1.8.98.1]	Cysteine-rich domain	0	54	1	243	319	202	239	199	0	48.7805	0.903342	219.512	288.166	182.475	215.899	179.765	-0.430127	-0.0104193	-0.280491	0.19595	0.212985	0.510073	0.393873	0.417079
622	Cofactor recycling	[FeS]-oxidoreductase	FeS-or		Fe-S cluster-containing oxidoreductase, includes glycolate oxidase subunit GlcF (GlpC)!!!NADPH-dependent glutamate synthase beta chain or related oxidoreductase (GltD) (PDB:1H7X)		Flavin containing amine oxidoreductase	0	251	7	840	1162	704	797	757	0	93.6917	2.61292	313.55	433.744	262.785	297.499	282.568	-0.813952	0.269897	0.0346537	0.350164	0.390082	0.667704	0.532473	0.612694
1720	Cofactor recycling	[FeS]-oxidoreductase	FeS-or		Fe-S cluster-containing oxidoreductase, includes glycolate oxidase subunit GlcF (GlpC)	heterodisulfide reductase subunit D [EC:1.8.98.1]	Cysteine-rich domain	0	130	5	238	392	96	160	133	0	118.397	4.55373	216.758	357.013	87.4317	145.719	121.129	-0.426582	0.37234	0.287325	0.190485	0.305899	0.19172	0.223587	0.246163
1769	Cofactor recycling	[FeS]-oxidoreductase	FeS-or		Fe-S cluster-containing oxidoreductase, includes glycolate oxidase subunit GlcF (GlpC)!!!Coenzyme F420-reducing hydrogenase, delta subunit (FrhD) (PDB:5ODC)	F420-non-reducing hydrogenase iron-sulfur subunit [EC:1.12.99.- 1.8.98.5 1.8.98.6]	Cysteine-rich domain	0	86	5	260	338	53	136	95	0	51.9324	3.01932	157.005	204.106	32.0048	82.1256	57.3671	-0.60504	0.0152875	0.108868	0.050346	0.0631604	-0.242911	-0.025213	-0.0777732
1876	Cofactor recycling	[FeS]-oxidoreductase	FeS-or		Fe-S cluster-containing oxidoreductase, includes glycolate oxidase subunit GlcF (GlpC)		Cysteine-rich domain	0	44	0	87	97	42	51	24	0	41.0831	0	81.2325	90.5696	39.2157	47.619	22.409	-0.415769	-0.0840977	-0.743254	-0.234183	-0.288123	-0.153605	-0.259268	-0.47934
1878	Cofactor recycling	[FeS]-oxidoreductase	FeS-or		Fe-S cluster-containing oxidoreductase, includes glycolate oxidase subunit GlcF (GlpC)		4Fe-4S dicluster domain	0	33	1	65	77	14	25	28	0	56.701	1.71821	111.684	132.302	24.055	42.9553	48.11	-0.150902	0.0574536	-0.00126658	-0.095083	-0.122959	-0.355759	-0.299668	-0.148794
183	Cofactor recycling	NADH dehydrogenase	ndh	ndh	NADH dehydrogenase, FAD-containing subunit (Ndh) (PDB:5NA4)	NADH:ubiquinone reductase (H+-translocating) [EC:7.1.1.2]	L-lysine 6-monooxygenase/L-ornithine 5-monooxygenase	0	104	6	282	369	95	127	111	0	94.2029	5.43478	255.435	334.239	86.0507	115.036	100.543	-0.428949	0.273479	0.357509	0.261648	0.277307	0.18483	0.121256	0.16559
192	Cofactor recycling	NADH dehydrogenase	ndh		NADH:ubiquinone oxidoreductase 27 kD subunit (chain C) (NuoC)!!!Ni,Fe-hydrogenase III large subunit (HycE2) (PDB:6CFW)		Respiratory-chain NADH dehydrogenase, 30 Kd subunit	2	28	0	71	96	17	40	28	4.19287	58.7002	0	148.847	201.258	35.6394	83.8574	58.7002	0.634472	0.0736583	-0.391983	0.0293863	0.058671	-0.187685	-0.0123487	-0.0623898
193	Cofactor recycling	NADH dehydrogenase	ndh		Ni,Fe-hydrogenase III large subunit (HycE2) (PDB:6CFW)		Respiratory-chain NADH dehydrogenase, 49 Kd subunit	1	18	3	78	104	25	39	21	2.88184	60.5187	0.960615	143.132	175.793	40.3458	60.5187	35.5427	0.441668	0.0826548	-0.253794	0.0107891	-0.00115256	-0.141266	-0.155962	-0.282136
194	Cofactor recycling	NADH dehydrogenase	ndh		Formate hydrogenlyase subunit HyfC (HyfC) (PDB:6CFW)		NADH dehydrogenase	1	18	3	78	104	25	39	21	1.05152	18.9274	3.15457	82.0189	109.359	26.2881	41.0095	22.082	0.112961	-0.413677	0.153453	-0.229712	-0.206402	-0.323845	-0.322869	-0.484458
540	Cofactor recycling	NADH dehydrogenase	ndh	ndh	NADH dehydrogenase, FAD-containing subunit (Ndh) (PDB:5NA4)	NADH:ubiquinone reductase (H+-translocating) [EC:7.1.1.2]	FAD dependent oxidoreductase	1	92	1	235	335	217	198	237	0.799361	73.5412	0.799361	187.85	267.786	173.461	158.273	189.448	-0.00611548	0.166216	-0.333601	0.128332	0.181097	0.487997	0.259218	0.43969
948	Cofactor recycling	NADH dehydrogenase	ndh		NADH:ubiquinone oxidoreductase subunit 1 (chain H) (NuoH) (PDB:6HUM)	F420H2:quinone oxidoreductase subunit H [EC:1.1.98.4]	NADH dehydrogenase	0	50	0	148	189	49	76	53	0	46.1681	0	136.657	174.515	45.2447	70.1754	48.9381	-0.420608	-0.0340053	-0.748093	-0.00930337	-0.00435714	-0.0922277	-0.0922524	-0.144991
949	Cofactor recycling	NADH dehydrogenase	ndh		NADH:ubiquinone oxidoreductase 49 kD subunit (chain D) (NuoD) (PDB:2FUG)		Respiratory-chain NADH dehydrogenase, 30 Kd subunit	0	151	3	514	577	132	237	204	0	65.7952	1.30719	223.965	251.416	57.5163	103.268	88.8889	-0.746762	0.116962	-0.22915	0.204201	0.153431	0.00922871	0.0735956	0.111194
1133	Cofactor recycling	NADH dehydrogenase	ndh	ndh	NADH dehydrogenase, FAD-containing subunit (Ndh) (PDB:5NA4)	sulfide:quinone oxidoreductase [EC:1.8.5.4]	Pyridine nucleotide-disulphide oxidoreductase	0	83	4	390	351	224	345	193	0	70.0422	3.37553	329.114	296.203	189.03	291.139	162.869	-0.459698	0.1453	0.167059	0.371501	0.224869	0.525294	0.523444	0.374246
1174	Cofactor recycling	NADH dehydrogenase	ndh		Ni,Fe-hydrogenase III large subunit (HycE2) (PDB:6CFW)	ech hydrogenase subunit E	Respiratory-chain NADH dehydrogenase, 49 Kd subunit	4	75	1	325	329	113	249	200	3.41006	63.9386	0.852515	277.067	280.477	96.3342	212.276	170.503	0.498965	0.105981	-0.305642	0.296852	0.20122	0.233493	0.386487	0.3941
1175	Cofactor recycling	NADH dehydrogenase	ndh		Formate hydrogenlyase subunit HyfC (HyfC) (PDB:6CFW)		NADH dehydrogenase	0	53	1	226	189	102	232	207	0	56.2633	1.06157	239.915	200.637	108.28	246.285	219.745	-0.36003	0.0516347	-0.210394	0.234616	0.0562204	0.284468	0.451087	0.504251
947	Cofactor recycling	F420H2:quinone oxidoreductase	fqo	fqoI	Formate hydrogenlyase subunit 6/NADH:ubiquinone oxidoreductase 23 kD subunit (chain I) (NuoI) (PDB:1B0P)	F420H2:quinone oxidoreductase subunit I [EC:1.1.98.4]	4Fe-4S binding domain	0	35	0	140	100	27	46	32	0	46.8541	0	187.416	133.869	36.1446	61.5797	42.838	-0.2593	-0.0257605	-0.586785	0.127954	-0.118492	-0.186192	-0.147153	-0.200154
948	Cofactor recycling	F420H2:quinone oxidoreductase	fqo	fqoH	NADH:ubiquinone oxidoreductase subunit 1 (chain H) (NuoH) (PDB:6HUM)	F420H2:quinone oxidoreductase subunit H [EC:1.1.98.4]	NADH dehydrogenase	0	50	0	148	189	49	76	53	0	46.1681	0	136.657	174.515	45.2447	70.1754	48.9381	-0.420608	-0.0340053	-0.748093	-0.00930337	-0.00435714	-0.0922277	-0.0922524	-0.144991
949	Cofactor recycling	F420H2:quinone oxidoreductase	fqo		NADH:ubiquinone oxidoreductase 49 kD subunit (chain D) (NuoD) (PDB:2FUG)		Respiratory-chain NADH dehydrogenase, 30 Kd subunit	0	151	3	514	577	132	237	204	0	65.7952	1.30719	223.965	251.416	57.5163	103.268	88.8889	-0.746762	0.116962	-0.22915	0.204201	0.153431	0.00922871	0.0735956	0.111194
950	Cofactor recycling	F420H2:quinone oxidoreductase	fqo		GTPase-interacting Yip1 domain (Yip1) (PUBMED:25702751;31417902)		Yip1 domain	0	23	1	59	75	11	26	15	0	37.037	1.61031	95.0081	120.773	17.7134	41.868	24.1546	-0.179071	-0.124692	-0.0294352	-0.164976	-0.162483	-0.484598	-0.311131	-0.441476
951	Cofactor recycling	F420H2:quinone oxidoreductase	fqo	fqoA	NADH:ubiquinone oxidoreductase subunit 3 (chain A) (NuoA) (PDB:3RKO)	F420H2:quinone oxidoreductase subunit A [EC:1.1.98.4]	NADH-ubiquinone/plastoquinone oxidoreductase, chain 3	0	24	0	36	50	15	12	11	0	68.3761	0	102.564	142.45	42.735	34.188	31.339	0.0687135	0.141191	-0.258772	-0.129416	-0.0893536	-0.10718	-0.389682	-0.323326
952	Cofactor recycling	F420H2:quinone oxidoreductase	fqo	fqoN	NADH:ubiquinone oxidoreductase subunit 2 (chain N) (NuoN) (PDB:4HE8)	F420H2:quinone oxidoreductase subunit N [EC:1.1.98.4]	Proton-conducting membrane transporter	0	42	2	95	135	42	50	51	0	34.2298	1.62999	77.4246	110.024	34.2298	40.7498	41.5648	-0.474824	-0.163124	-0.103339	-0.255243	-0.204243	-0.21266	-0.326839	-0.215754
953	Cofactor recycling	F420H2:quinone oxidoreductase	fqo	fqoL	Membrane H+-translocase/NADH:ubiquinone oxidoreductase subunit 5 (chain L)/Multisubunit Na+/H+ antiporter, MnhA subunit (NuoL) (PDB:3RKO)	F420H2:quinone oxidoreductase subunit L [EC:1.1.98.4]	Proton-conducting membrane transporter	0	73	9	249	238	120	161	102	0	37.7261	4.65116	128.682	122.997	62.0155	83.2041	52.7132	-0.67266	-0.123062	0.278608	-0.0360118	-0.15653	0.0421016	-0.0197938	-0.114673
954	Cofactor recycling	F420H2:quinone oxidoreductase	fqo	fqoM	Formate hydrogenlyase subunit 3/Multisubunit Na+/H+ antiporter, MnhD subunit (HyfB) (PDB:6CFW)	F420H2:quinone oxidoreductase subunit M [EC:1.1.98.4]	Proton-conducting membrane transporter	0	63	2	137	169	56	70	60	0	43.1211	1.36893	93.7714	115.674	38.3299	47.9124	41.0678	-0.55063	-0.0645447	-0.179145	-0.172749	-0.182818	-0.164806	-0.257746	-0.221611
955	Cofactor recycling	F420H2:quinone oxidoreductase	fqo	fqoK		F420H2:quinone oxidoreductase subunit K [EC:1.1.98.4]		0	14	0	28	50	4	10	10	0	51.8519	0	103.704	185.185	14.8148	37.037	37.037	0.182657	0.027336	-0.144829	-0.12292	0.0245897	-0.530356	-0.35146	-0.248891
956	Cofactor recycling	F420H2:quinone oxidoreductase	fqo	fqoJ	NADH:ubiquinone oxidoreductase subunit 6 (chain J) (NuoJ) (PDB:4HE8)	F420H2:quinone oxidoreductase subunit J [EC:1.1.98.4]		0	17	1	46	47	24	27	26	0	37.7778	2.22222	102.222	104.444	53.3333	60	57.7778	-0.0391919	-0.112843	0.110444	-0.132161	-0.223857	-0.0162509	-0.155165	-0.0686829
399	Electron transport	Electron transfer flavoprotein	fqo	fixA	Electron transfer flavoprotein, alpha and beta subunits (FixA) (PDB:5OL2)	electron transfer flavoprotein beta subunit	Electron transfer flavoprotein domain	0	63	2	117	117	54	93	81	0	78.3582	2.48756	145.522	145.522	67.1642	115.672	100.746	-0.291235	0.194849	0.0802491	0.0183805	-0.0825561	0.078936	0.12427	0.167185
907	Electron transport	Electron transfer flavoprotein	fqo	fixB	Electron transfer flavoprotein, alpha subunit FixB (FixB) (PDB:1EFP)	electron transfer flavoprotein alpha subunit	Electron transfer flavoprotein domain	0	46	0	131	224	60	70	52	0	45.6349	0	129.96	222.222	59.5238	69.4444	51.5873	-0.38944	-0.0386758	-0.716925	-0.0309361	0.100418	0.0260904	-0.0965567	-0.122018
1156	Electron transport	Electron transfer flavoprotein	fqo	fixB	Electron transfer flavoprotein, alpha subunit FixB (FixB) (PDB:1EFP)	electron transfer flavoprotein alpha subunit	Electron transfer flavoprotein domain	0	92	0	510	395	219	387	302	0	93.2118	0	516.717	400.203	221.884	392.097	305.978	-0.380297	0.269156	-0.707782	0.567277	0.355491	0.594913	0.652669	0.647692
1157	Electron transport	Electron transfer flavoprotein	fqo	fixA	Electron transfer flavoprotein, alpha and beta subunits (FixA) (PDB:5OL2)	electron transfer flavoprotein beta subunit	Electron transfer flavoprotein domain	0	115	3	570	511	222	444	331	0	144.654	3.77358	716.981	642.767	279.245	558.491	416.352	-0.286347	0.459547	0.231266	0.709487	0.561141	0.694758	0.806219	0.7814
168	Electron transport	Flagellin B	flaB	flaB	Archaellin (archaeal flagellin) (FlaB) (PDB:5O4U)	archaeal flagellin FlaB	Archaebacterial flagellin	0	131	3	939	469	855	725	566	0	221.658	5.07614	1588.83	793.57	1446.7	1226.73	957.699	-0.157567	0.64467	0.360046	1.05491	0.65271	1.40843	1.14776	1.1429
169	Electron transport	Flagellin B	flaB	flaB	Archaellin (archaeal flagellin) (FlaB) (PDB:5O4U)	archaeal flagellin FlaB	Archaebacterial flagellin	0	175	3	1278	608	1026	923	738	0	239.071	4.09836	1745.9	830.601	1401.64	1260.93	1008.2	-0.250491	0.677098	0.267122	1.09579	0.672412	1.39464	1.15964	1.16512
170	Electron transport	Flagellin B	flaB	flaB	Archaellin (archaeal flagellin) (FlaB) (PDB:5O4U)	archaeal flagellin FlaB	Archaebacterial flagellin	0	93	1	725	419	522	626	501	0	166.667	1.79211	1299.28	750.896	935.484	1121.86	897.849	-0.132614	0.521509	0.0170222	0.967602	0.62876	1.21925	1.109	1.11492
1332	Electron transport	Type IV pilin	pilA	pilA	Archaeal flagellin (archaellin), FlaG/FlaF family	archaeal type IV pilus assembly protein PilA	Archaeal Type IV pilin, N-terminal	13	494	0	2089	859	1183	866	1212	30.9524	1176.19	0	4973.81	2045.24	2816.67	2061.9	2885.71	1.42214	1.36825	-0.336714	1.55039	1.06366	1.69771	1.37323	1.62172
1499	Electron transport	Type IV pilin	pilA	pilA	Archaeal flagellin (archaellin), FlaG/FlaF family	archaeal type IV pilus assembly protein PilA	Archaeal Type IV pilin, N-terminal	0	75	1	450	251	229	300	372	0	148.81	1.98413	892.857	498.016	454.365	595.238	738.095	-0.08841	0.472848	0.0612259	0.804863	0.45077	0.906148	0.834129	1.02998
1801	Electron transport	Type IV pilin	pilA	pilA		archaeal type IV pilus assembly protein PilA	Archaeal Type IV pilin, N-terminal	156	180	76	52	60	16	26	20	366.197	422.535	178.404	122.066	140.845	37.5587	61.0329	46.9484	2.48016	0.924399	1.84182	-0.0556517	-0.0949921	-0.16413	-0.147449	-0.156372
1804	Electron transport	Type IV pilin	pilA	pilA	Archaeal flagellin (archaellin), FlaG/FlaF family	archaeal type IV pilus assembly protein PilA	Archaeal Type IV pilin, N-terminal	129	7	3	78	72	19	29	22	268.75	14.5833	6.25	162.5	150	39.5833	60.4167	45.8333	2.34608	-0.508848	0.450392	0.0672271	-0.0682411	-0.143411	-0.152705	-0.167775
1805	Electron transport	Type IV pilin	pilA	pilA	Archaeal flagellin (archaellin), FlaG/FlaF family	archaeal type IV pilus assembly protein PilA	Archaeal Type IV pilin, N-terminal	30	33	13	123	116	19	34	30	37.8788	41.6667	16.4141	155.303	146.465	23.9899	42.9293	37.8788	1.50063	-0.0763486	0.819174	0.0465404	-0.0797372	-0.360895	-0.302191	-0.253142
1872	Electron transport	Type IV pilin	pilA	pilA		archaeal type IV pilus assembly protein PilA	Archaeal Type IV pilin, N-terminal	138	4612	152	164	85	2607	12836	28736	85.8209	2868.16	94.5274	101.99	52.8607	1621.27	7982.59	17870.6	1.85021	1.75498	1.56455	-0.136522	-0.521658	1.45773	1.96088	2.41343
189	Electron transport	[NiFe]-hydrogenase	hyd	hycG	Ni,Fe-hydrogenase III small subunit (HycG) (PDB:6CFW)		NADH ubiquinone oxidoreductase, 20 Kd subunit	1	14	1	17	14	4	7	2	2.73224	38.2514	2.73224	46.4481	38.2514	10.929	19.1257	5.46448	0.527661	-0.104781	0.200175	-0.466844	-0.649451	-0.662473	-0.629705	-1.00426
193	Electron transport	[NiFe]-hydrogenase	hyd	hycE2	Ni,Fe-hydrogenase III large subunit (HycE2) (PDB:6CFW)		Respiratory-chain NADH dehydrogenase, 49 Kd subunit	1	18	3	78	104	25	39	21	2.88184	60.5187	0.960615	143.132	175.793	40.3458	60.5187	35.5427	0.441668	0.0826548	-0.253794	0.0107891	-0.00115256	-0.141266	-0.155962	-0.282136
836	Electron transport	[NiFe]-hydrogenase	hyd	hyaD	Ni,Fe-hydrogenase maturation factor (HyaD) (PDB:1CFZ) (PUBMED:15294295)	hydrogenase maturation protease [EC:3.4.23.-]	Hydrogenase maturation protease	0	19	0	49	44	17	31	18	0	34.2342	0	88.2883	79.2793	30.6306	55.8559	32.4324	-0.130272	-0.156927	-0.457758	-0.196089	-0.343271	-0.253459	-0.187268	-0.315838
1002	Electron transport	[NiFe]-hydrogenase	hyd	hyaA	Ni,Fe-hydrogenase I small subunit (HyaA) (PDB:6FPI)	hydrogenase small subunit [EC:1.12.99.6]	NiFe/NiFeSe hydrogenase small subunit C-terminal	0	64	0	281	273	206	261	155	0	67.086	0	294.549	286.164	215.933	273.585	162.474	-0.365528	0.127343	-0.693013	0.323529	0.210071	0.583167	0.496638	0.373466
1003	Electron transport	[NiFe]-hydrogenase	hyd	hyaB	Ni,Fe-hydrogenase I large subunit (HyaB) (PDB:6FPI) (PUBMED:25905665)	hydrogenase large subunit [EC:1.12.99.6]	Nickel-dependent hydrogenase	0	144	6	806	625	462	802	476	0	83.3333	3.47222	466.435	361.69	267.361	464.12	275.463	-0.623523	0.219656	0.162935	0.522659	0.311346	0.675364	0.725616	0.601803
1005	Electron transport	[NiFe]-hydrogenase	hyd	hyaD	Ni,Fe-hydrogenase maturation factor (HyaD) (PDB:1CFZ) (PUBMED:15294295)	hydrogenase maturation protease [EC:3.4.23.-]	Hydrogenase maturation protease	0	57	0	94	128	27	41	42	0	118.012	0	194.617	265.01	55.9006	84.8861	86.9565	-0.0699266	0.373052	-0.397412	0.145083	0.177618	0.00318108	-0.00718437	0.105726
1169	Electron transport	[NiFe]-hydrogenase	hyd	hycG	Ni,Fe-hydrogenase III small subunit (HycG) (PDB:6CFW)	membrane-bound hydrogenase subunit mbhJ [EC:1.12.7.2]	NADH ubiquinone oxidoreductase, 20 Kd subunit	0	37	0	297	217	305	316	282	0	79.5699	0	638.71	466.667	655.914	679.57	606.452	-0.0534324	0.20391	-0.380918	0.659633	0.422668	1.06535	0.891635	0.944849
1174	Electron transport	[NiFe]-hydrogenase	hyd	hycE2	Ni,Fe-hydrogenase III large subunit (HycE2) (PDB:6CFW)	ech hydrogenase subunit E	Respiratory-chain NADH dehydrogenase, 49 Kd subunit	4	75	1	325	329	113	249	200	3.41006	63.9386	0.852515	277.067	280.477	96.3342	212.276	170.503	0.498965	0.105981	-0.305642	0.296852	0.20122	0.233493	0.386487	0.3941
1644	Electron transport	[NiFe]-hydrogenase	hyd	hyaD	Ni,Fe-hydrogenase maturation factor (HyaD) (PDB:1CFZ) (PUBMED:15294295)	hydrogenase 3 maturation protease [EC:3.4.23.51]	Hydrogenase maturation protease	0	33	0	52	61	13	34	36	0	63.9535	0	100.775	118.217	25.1938	65.8915	69.7674	-0.0986291	0.109727	-0.426115	-0.138892	-0.171112	-0.33452	-0.116116	0.0109269
518	Electron transport	Formate dehydrogenase	fdh		Predicted molibdopterin-dependent oxidoreductase YjgC (YjgC) (PDB:1AA6)	formate dehydrogenase major subunit [EC:1.17.1.9]	Molybdopterin oxidoreductase	0	171	2	404	583	174	357	228	0	84.195	0.984737	198.917	287.051	85.6721	175.775	112.26	-0.693689	0.223886	-0.322205	0.152807	0.210993	0.181881	0.304281	0.21246
519	Electron transport	Formate dehydrogenase	fdh		Coenzyme F420-reducing hydrogenase, beta subunit (FrhB) (PDB:3ZFS)!!!L-lactate utilization protein LutB, contains a ferredoxin-type domain (LutB)	formate dehydrogenase (coenzyme F420) beta subunit [EC:1.17.98.3 1.8.98.6]	4Fe-4S dicluster domain	0	109	3	306	443	127	204	146	0	88.6179	2.43902	248.78	360.163	103.252	165.854	118.699	-0.475885	0.246841	0.0417281	0.250124	0.309651	0.263401	0.279503	0.237216
926	Electron transport	Formate dehydrogenase	fdh		Predicted molibdopterin-dependent oxidoreductase YjgC (YjgC) (PDB:1AA6)	formate dehydrogenase major subunit [EC:1.17.1.9]	Molybdopterin oxidoreductase	871	2424	1667	2107	1604	625	926	578	318.697	886.937	609.952	770.948	586.901	228.686	338.822	211.489	2.41868	1.24531	2.37299	0.740727	0.521362	0.607383	0.58892	0.486947
927	Electron transport	Formate dehydrogenase	fdh		Fe-S-cluster-containing dehydrogenase component (DMSO reductase) (HybA) (PDB:2VPW)	formate dehydrogenase iron-sulfur subunit	4Fe-4S binding domain	192	674	405	476	406	155	222	113	345.946	1214.41	729.73	857.658	731.532	279.279	400	203.604	2.45519	1.38202	2.45126	0.787369	0.61743	0.695233	0.661752	0.471987
929	Electron transport	Formate dehydrogenase	fdh	fdhD	Formate dehydrogenase assembly factor FdhD, a sulfurtransferase (FdhD) (PDB:2PW9)	FdhD protein	FdhD/NarQ family	0	43	1	60	68	16	26	11	0	112.861	2.62467	157.48	178.478	41.9948	68.2415	28.8714	0.0330956	0.354896	0.182731	0.054429	0.00742769	-0.115646	-0.0989644	-0.358943
1539	Electron transport	Formate dehydrogenase	fdh		Coenzyme F420-reducing hydrogenase, beta subunit (FrhB) (PDB:3ZFS)!!!L-lactate utilization protein LutB, contains a ferredoxin-type domain (LutB)	formate dehydrogenase (coenzyme F420) beta subunit [EC:1.17.98.3 1.8.98.6]	4Fe-4S binding domain	0	90	3	289	388	212	274	219	0	75.7576	2.52525	243.266	326.599	178.451	230.64	184.343	-0.460796	0.179164	0.0568167	0.240431	0.267237	0.500338	0.422441	0.427902
1657	Electron transport	Formate dehydrogenase	fdh	fdhD	Formate dehydrogenase assembly factor FdhD, a sulfurtransferase (FdhD) (PDB:2PW9)	FdhD/NarQ family	FdhD protein	2	29	1	66	76	9	36	35	2.69906	39.1363	1.34953	89.0688	102.564	12.1457	48.583	47.2335	0.455838	-0.100896	-0.103592	-0.198733	-0.236782	-0.652926	-0.26159	-0.169756
1722	Electron transport	Formate dehydrogenase	fdh		L-lactate utilization protein LutB, contains a ferredoxin-type domain (LutB)	formate dehydrogenase (coenzyme F420) beta subunit [EC:1.17.98.3 1.8.98.6]	4Fe-4S binding domain	0	37	1	186	203	83	146	87	0	37.2608	1.00705	187.311	204.431	83.5851	147.029	87.6133	-0.370263	-0.123818	-0.230723	0.121994	0.0609902	0.163906	0.214824	0.0948931
Additional genes							doa
279	Potential alkyl-CoM to acyl-CoA conversion	Aldehyde:ferredoxin reductase	aor	ydhV	Aldehyde:ferredoxin oxidoreductase (YdhV) (PDB:1AOR)	aldehyde:ferredoxin oxidoreductase [EC:1.2.7.5]	Aldehyde ferredoxin oxidoreductase, domains 2 & 3	0	76	1	186	226	213	315	232	0	41.1255	0.541126	100.649	122.294	115.26	170.455	125.541	-0.640016	-0.0839407	-0.500475	-0.147759	-0.162259	0.301864	0.278233	0.249555
683	Potential alkyl-CoM to acyl-CoA conversion	Aldehyde:ferredoxin reductase	aor	ydhV	Aldehyde:ferredoxin oxidoreductase (YdhV) (PDB:1AOR)	aldehyde:ferredoxin oxidoreductase [EC:1.2.7.5]	Aldehyde ferredoxin oxidoreductase, domains 2 & 3	0	72	0	232	221	91	208	143	0	41.3081	0	133.104	126.793	52.2088	119.334	82.0425	-0.614612	-0.0818596	-0.952192	-0.0266105	-0.146549	-0.0407078	0.123744	0.0653888
923	Potential alkyl-CoM to acyl-CoA conversion	Aldehyde:ferredoxin reductase	aor	ydhV	Aldehyde:ferredoxin oxidoreductase (YdhV) (PDB:1AOR)	aldehyde:ferredoxin oxidoreductase [EC:1.2.7.5]	Aldehyde ferredoxin oxidoreductase, domains 2 & 3	0	97	2	263	256	167	278	183	0	51.0795	1.05319	138.494	134.808	87.941	146.393	96.3665	-0.651839	0.00957945	-0.29045	-0.00948042	-0.120063	0.184658	0.212236	0.134945
1036	Potential alkyl-CoM to acyl-CoA conversion	Aldehyde:ferredoxin reductase	aor	ydhV	Aldehyde:ferredoxin oxidoreductase (YdhV) (PDB:1AOR)	aldehyde:ferredoxin oxidoreductase [EC:1.2.7.5]	Aldehyde ferredoxin oxidoreductase, N-terminal domain	0	29	1	47	61	49	30	52	0	45.5975	1.57233	73.8994	95.9119	77.044	47.1698	81.761	-0.176771	-0.0345353	-0.0372306	-0.2785	-0.265207	0.130317	-0.273222	0.0665365
1054	Potential alkyl-CoM to acyl-CoA conversion	Aldehyde:ferredoxin reductase	aor	ydhV	Aldehyde:ferredoxin oxidoreductase (YdhV) (PDB:1AOR)	aldehyde:ferredoxin oxidoreductase [EC:1.2.7.5]	Aldehyde ferredoxin oxidoreductase, domains 2 & 3	0	98	3	290	426	132	165	131	0	56.032	1.71527	165.809	243.568	75.4717	94.3396	74.8999	-0.616104	0.0497462	-0.108587	0.0686203	0.136504	0.118595	0.0219437	0.0259703
1939	Potential alkyl-CoM to acyl-CoA conversion	Aldehyde:ferredoxin reductase	aor	ydhV	Aldehyde:ferredoxin oxidoreductase (YdhV) (PDB:1AOR)	aldehyde:ferredoxin oxidoreductase [EC:1.2.7.5]	Aldehyde ferredoxin oxidoreductase, domains 2 & 3	0	47	3	109	184	112	85	78	0	32.8442	2.09644	76.1705	128.581	78.2669	59.399	54.5073	-0.528954	-0.179846	-0.0214364	-0.267962	-0.140268	0.134681	-0.177738	-0.110936

## Sheet: MAG 24 (T. syntrophicum)
Dissimilatory sulfate reduction and electron transfer								Raw fragments								Fragments per kilobase (FPK)								Centered log ratio (CLR)
gene_callers_id	pathway_part	protein	protein_abbreviation	specific_gene	COG20_function	KOfam_function	Pfam_function	pentane	hexane	heptane	octane	nonane	decane	dodecane	tetradecane	pentane	hexane	heptane	octane	nonane	decane	dodecane	tetradecane	pentane	hexane	heptane	octane	nonane	decane	dodecane	tetradecane
1306	Sulfate reduction	ATP sulfurylase	sat		ATP sulfurylase (sulfate adenylyltransferase) (MET3) (PDB:1G8F)	sulfate adenylyltransferase [EC:2.7.7.4]		96	111	36	50	31	19	36	14	240.602	278.195	90.2256	125.313	77.6942	47.619	90.2256	35.0877	0.170802	0.431633	0.341841	0.438803	0.393727	0.395934	0.87931	0.655728
1303	Sulfate reduction	APS reductase	apr		Succinate dehydrogenase/fumarate reductase, flavoprotein subunit (SdhA) (PDB:1KF6)	adenylylsulfate reductase, subunit A [EC:1.8.99.2]	FAD dependent oxidoreductase	259	199	103	99	79	48	34	17	208.535	160.225	82.9308	79.7101	63.6071	38.6473	27.3752	13.6876	0.107264	0.191153	0.30134	0.240186	0.302635	0.298493	0.361688	0.244249
1304	Sulfate reduction	APS reductase	apr		NAD-dependent dihydropyrimidine dehydrogenase, PreA subunit (PreA)	adenylylsulfate reductase, subunit B [EC:1.8.99.2]	FAD binding domain	366	784	548	419	421	254	297	142	182.909	391.804	273.863	209.395	210.395	126.937	148.426	70.9645	0.0500749	0.578677	0.818451	0.65797	0.81994	0.811313	1.09023	0.947901
699	Sulfate reduction	Dissimilatory sulfite reductase	dsr		Sulfur transfer complex TusBCD TusE component, DsrC family (tRNA 2-thiouridine synthesizing protein C) (TusE) (PDB:1JI8)	dissimilatory sulfite reductase related protein	Helix-hairpin-helix motif	41	39	16	12	8	2	3	3	99.7567	94.8905	38.9294	29.1971	19.4647	4.86618	7.29927	7.29927	-0.208546	-0.0319135	-0.0158364	-0.180447	-0.188033	-0.509029	-0.151784	0.0255592
1428	Sulfate reduction	Dissimilatory sulfite reductase	dsr		Dissimilatory sulfite reductase (desulfoviridin), alpha and beta subunits (DsrA)	dissimilatory sulfite reductase alpha subunit [EC:1.8.99.5]	Type II/IV secretion system protein	364	235	87	80	62	39	17	11	179.487	115.878	42.8994	39.4477	30.572	19.2308	8.38264	5.42406	0.0418776	0.0502542	0.0154616	-0.0647874	-0.0147982	-0.00359833	-0.14604	-0.151037
1429	Sulfate reduction	Dissimilatory sulfite reductase	dsr		Dissimilatory sulfite reductase (desulfoviridin), alpha and beta subunits (DsrA)	dissimilatory sulfite reductase beta subunit [EC:1.8.99.5]	Nitrite and sulphite reductase 4Fe-4S domain	367	266	204	189	141	52	92	40	282.525	204.773	157.044	145.497	108.545	40.0308	70.8237	30.7929	0.238896	0.297419	0.577606	0.500485	0.533537	0.313423	0.770523	0.589179
1431	Sulfate reduction	Dissimilatory sulfite reductase	dsr		Predicted phosphotransferase, aminoglycoside/choline kinase (APH/ChoK) family	N-acetylmuramate 1-kinase [EC:2.7.1.221]	Dissimilatory sulfite reductase D (DsrD)	32	38	17	14	10	12	11	11	125.49	149.02	66.6667	54.902	39.2157	47.0588	43.1373	43.1373	-0.107409	0.164252	0.217019	0.0913125	0.111039	0.397242	0.572148	0.749491
172	Sulfate reduction	Dissimilatory sulfite reductase	dsr		Dissimilatory sulfite reductase (desulfoviridin), alpha and beta subunits (DsrA)			3	4	0	0	0	1	0	0	22.7273	30.303	0	0	0	7.57576	0	0	-0.789258	-0.48203	-1.04108	-1.08512	-0.925214	-0.23761	-0.503614	-0.326271
642	Electron transport	Type IV pilin	pilA	pilA		type IV pilus assembly protein PilA		70	48	23	24	19	17	4	5	143.149	98.1595	47.0348	49.0798	38.8548	34.7648	8.17996	10.2249	-0.0538717	-0.0182359	0.0622805	0.0363419	0.0971155	0.260602	-0.118106	0.146387
643	Electron transport	Type IV pilin	pilA	pilA	Type IV pilus assembly protein, major pilin PilA (PilA) (PDB:1AY2)		Prokaryotic N-terminal methylation motif	54	80	17	43	22	25	24	11	139.535	206.718	43.9276	111.111	56.8475	64.5995	62.0155	28.4238	-0.0640665	0.303416	0.0358486	0.387263	0.260861	0.525702	0.719445	0.56832
816	Electron transport	Type IV pilin	pilA	pilA	Type IV pilus assembly protein, major pilin PilA (PilA) (PDB:1AY2)		Mechanosensitive ion channel	187	69	41	33	42	18	17	7	182.796	67.4487	40.0782	32.2581	41.0557	17.5953	16.6178	6.84262	0.0503736	-0.18256	-0.011306	-0.148346	0.114903	-0.0358314	0.151153	-0.0394814
500	Electron transport	Multi-heme c-type cytochrome	cyt		Predicted Zn-dependent protease (PDB:2X7M)	archaemetzincin [EC:3.4.-.-]	Cytochrome c7 and related cytochrome c	604	357	154	175	122	50	64	27	222.468	131.492	56.7219	64.4567	44.9355	18.4162	23.5727	9.94475	0.134874	0.104837	0.13568	0.146992	0.150756	-0.0236059	0.29378	0.100896
1561	Electron transport	Multi-heme c-type cytochrome	cyt		Fe-S cluster-containing oxidoreductase, includes glycolate oxidase subunit GlcF (GlpC)		Cytochrome c7 and related cytochrome c	305	260	102	114	81	44	45	18	175.287	149.425	58.6207	65.5172	46.5517	25.2874	25.8621	10.3448	0.03171	0.16059	0.150696	0.154741	0.166998	0.114683	0.335452	0.121955
106	Electron transport	Multi-heme c-type cytochrome	cyt		Signal recognition particle GTPase FtsY (FtsY) (PDB:4AK9)	fused signal recognition particle receptor	Cytochrome c7 and related cytochrome c	200	136	61	68	29	23	16	5	189.934	129.155	57.9297	64.5774	27.5404	21.8424	15.1947	4.74834	0.066934	0.0980355	0.146968	0.149747	-0.0562167	0.055512	0.113046	-0.186733
987	Electron transport	Multi-heme c-type cytochrome	cyt				Cytochrome c554 and c-prime	156	113	51	59	39	29	11	6	125.604	90.9823	41.0628	47.504	31.401	23.3494	8.85668	4.83092	-0.112359	-0.0537945	-0.00179288	0.01688	-0.0011348	0.0825729	-0.115434	-0.185875
498	Electron transport	Multi-heme c-type cytochrome	cyt		Thiosulfate reductase cytochrome b subunit (YdhU)	formate dehydrogenase subunit gamma	Cytochrome c7 and related cytochrome c	95	69	42	32	28	17	13	12	251.323	182.54	111.111	84.6561	74.0741	44.9735	34.3915	31.746	0.18976	0.249824	0.431419	0.270876	0.373743	0.372419	0.470832	0.614751
429	Electron transport	Multi-heme c-type cytochrome	cyt		Fe-S cluster-containing oxidoreductase, includes glycolate oxidase subunit GlcF (GlpC)	heterodisulfide reductase iron-sulfur subunit		78	19	11	14	7	7	10	0	201.55	49.0956	28.4238	36.1757	18.0879	18.0879	25.8398	0	0.0944067	-0.312345	-0.146492	-0.0898583	-0.21626	-0.00577718	0.351469	-0.793408
404	Electron transport	[NiFe]-hydrogenase	hyd	hyaA	Ni,Fe-hydrogenase I small subunit (HyaA) (PDB:6FPI)	[NiFe] hydrogenase small subunit [EC:1.12.2.1]	Aldehyde ferredoxin oxidoreductase, domains 2 & 3	444	259	119	117	104	57	30	21	226.3	132.008	60.6524	59.633	53.0071	29.052	15.2905	10.7034	0.142421	0.10677	0.16519	0.113824	0.222807	0.173841	0.109591	0.135072
405	Electron transport	[NiFe]-hydrogenase	hyd	hyaB	Ni,Fe-hydrogenase I large subunit (HyaB) (PDB:6FPI) (PUBMED:25905665)		NiFe/NiFeSe hydrogenase small subunit C-terminal	133	146	121	188	129	133	115	38	144.88	159.041	131.808	204.793	140.523	144.88	125.272	41.3943	-0.0501134	0.188326	0.502255	0.648953	0.645817	0.869511	1.01773	0.717951
190	Electron transport	[NiFe]-hydrogenase	hyd	hyaD	Ni,Fe-hydrogenase maturation factor (HyaD) (PDB:1CFZ) (PUBMED:15294295)	hydrogenase maturation protease [EC:3.4.23.-]	Hydrogenase/urease nickel incorporation, metallochaperone, hypA	24	14	9	4	2	6	4	0	58.8235	34.3137	22.0588	9.80392	4.90196	14.7059	9.80392	0	-0.434246	-0.463961	-0.252415	-0.620963	-0.71633	-0.0908743	-0.0394574	-0.816357
426	Electron transport	[NiFe]-hydrogenase	hyd		Ni/Fe-hydrogenase 2 integral membrane subunit HybB (HybB)	dimethyl sulfoxide reductase membrane subunit	AAA domain	218	142	62	67	58	31	14	9	156.272	101.792	44.4444	48.0287	41.5771	22.2222	10.0358	6.45161	-0.0178748	-0.00542809	0.0318273	0.0212142	0.118971	0.0606089	-0.065216	-0.0715176
1127	Electron transport	[NiFe]-hydrogenase	hyd	hyaD	Ni,Fe-hydrogenase maturation factor (HyaD) (PDB:1CFZ) (PUBMED:15294295)	hydrogenase maturation protease [EC:3.4.23.-]	Bacterial extracellular solute-binding protein	222	144	48	56	49	16	21	5	264.286	171.429	57.1429	66.6667	58.3333	19.0476	25	5.95238	0.210299	0.22092	0.141984	0.164254	0.266716	7.71814e-05	0.326149	-0.0885836
1558	Electron transport	[NiFe]-hydrogenase	hyd	hybB	Ni/Fe-hydrogenase 2 integral membrane subunit HybB (HybB)			4	2	0	3	0	0	0	0	33.3333	16.6667	0	25	0	0	0	0	-0.638721	-0.69591	-0.99969	-0.198629	-0.883822	-0.673339	-0.462221	-0.284878
226	Electron transport	Formate dehydrogenase	fdh		Anaerobic selenocysteine-containing dehydrogenase (BisC) (PDB:1EU1)	formate dehydrogenase major subunit [EC:1.17.1.9]	Molybdopterin oxidoreductase Fe4S4 domain	139	165	95	85	47	36	43	27	246.454	292.553	168.44	150.709	83.3333	63.8298	76.2411	47.8723	0.180543	0.45285	0.609246	0.517172	0.421804	0.517886	0.8052	0.783387
227	Electron transport	Formate dehydrogenase	fdh		Fe-S-cluster-containing dehydrogenase component (DMSO reductase) (HybA) (PDB:2VPW)	formate dehydrogenase iron-sulfur subunit	Molybdopterin oxidoreductase	511	604	398	359	214	166	181	61	207.471	245.229	161.592	145.757	86.8859	67.3975	73.4876	24.7665	0.104629	0.375263	0.589485	0.500719	0.436353	0.536822	0.785402	0.492744
228	Electron transport	Formate dehydrogenase	fdh	fdhE	Formate dehydrogenase maturation protein FdhE (FdhE) (PDB:2FIY)	FdhE protein	4Fe-4S binding domain	112	172	123	82	52	40	54	27	156.206	239.888	171.548	114.365	72.5244	55.788	75.3138	37.6569	-0.0171186	0.366601	0.616669	0.397419	0.36103	0.458808	0.798868	0.679147
229	Electron transport	Formate dehydrogenase	fdh		Uncharacterized membrane protein, BrkB/YihY/UPF0761 family (not an RNase) (BrkB)	membrane protein	Protein involved in formate dehydrogenase formation	178	69	31	43	20	18	8	7	239.247	92.7419	41.6667	57.7957	26.8817	24.1935	10.7527	9.4086	0.167313	-0.0442569	0.00725911	0.103401	-0.0634294	0.102471	-0.0241638	0.0988213
